# Supplementary material for: Accessing chiral 2,2-disubstituted morpholines via organocatalytic enantioselective chlorocycloetherification
Source: Royal Society of Chemistry journal article supplement (doi:10.1039/d2qo00390b), 2022-01-01

# **Accessing Chiral 2,2-Disubstituted Morpholines via Organocatalytic Enantioselective Chlorocycloetherification**

Haijing Zhong, Tengbo Ding, Qifeng Guo, Zeng Tian, Pei Yu,\* and Xiaojian Jiang\*

International Cooperative Laboratory of Traditional Chinese Medicine Modernization and Innovative Drug Development  
of Chinese Ministry of Education (MOE), College of Pharmacy, Jinan University, Guangzhou 510632, China

E-mail: pennypeiyu@163.com; chemjxj2015@jnu.edu.cn

## Table of Contents

### GENERAL METHODS

|                                                                                       |   |
|---------------------------------------------------------------------------------------|---|
| General procedures-----                                                               | 3 |
| Materials -----                                                                       | 3 |
| Instrumentation -----                                                                 | 3 |
| Scheme 1. Catalyst screening -----                                                    | 4 |
| Figure 1. <sup>1</sup> H-NMR analysis of (DHQD) <sub>2</sub> PHAL and <b>1i</b> ----- | 5 |
| Evaluation of Antibacterial Activity -----                                            | 5 |
| Table 1. Substrate scope -----                                                        | 6 |

### SYNTHESIS OF ALKENOL SUBSTRATES AND ASYMMETRIC

#### CHLOROCYCLOETHERIFICATION REACTIONS

|                                                                                             |    |
|---------------------------------------------------------------------------------------------|----|
| General Procedure for the Synthesis of Alkenol Substrates-----                              | 7  |
| General Procedure for the asymmetric chlorocycloetherification -----                        | 12 |
| Representative Procedure for the asymmetric chlorocycloetherification (1.0 mmol scale)----- | 13 |
| Synthesis of <b>4</b> -----                                                                 | 35 |
| X-ray of <i>ent</i> - <b>2a</b> -----                                                       | 36 |
| <sup>1</sup> H/ <sup>13</sup> C Spectra -----                                               | 38 |

## GENERAL METHODS

### General Procedures

All reactions were generally performed open air or in dried glassware under an atmosphere of dry N<sub>2</sub>. Reaction mixtures were stirred magnetically unless otherwise indicated and monitored by thin layer chromatography (TLC) on Merck precoated glass-backed silica gel 60 F-254 0.25 mm plates with visualization by fluorescence quenching at 254 nm. TLC plates were stained using potassium permanganate. Chromatography purification of products (flash column chromatography) was performed on silica gel 60 (70-230 mesh, Merck) using a forced flow of eluent at 0.3-0.5 bar. Concentration of reaction product solutions and chromatography fractions under reduced pressure was performed by rotary evaporation at 35-45°C at the appropriate pressure and then at rt, ca. 10 mmHg (vacuum pump) unless otherwise indicated.

### Materials

All chemicals, including dry solvents were purchased from Aldrich, Fluka, Acros, TCI, Merck, Strem, or Alfa Aesar and used as such unless stated otherwise. Yields given refer to chromatographically purified compounds unless otherwise demonstrated.

### Instrumentation

Melting points were determined on a Sinoinstrument melting point apparatus. <sup>1</sup>H NMR spectra were recorded on Bruker 300 MHz or Bruker 400 MHz spectrometer. <sup>13</sup>C NMR spectra were recorded on Bruker 75 MHz or Bruker 100 MHz spectrometer. <sup>13</sup>C NMR chemical shifts are expressed in parts per million (δ) downfield from tetramethylsilane (with the central peak of CHCl<sub>3</sub> at 77.16 ppm used as standard). <sup>1</sup>H NMR chemical shifts are expressed in parts per million (δ) downfield from tetramethylsilane (with the peak of CHCl<sub>3</sub> at 7.26 ppm used as standard; with the peak of benzene at 7.36 ppm used as standard). All <sup>13</sup>C spectra were measured with complete proton decoupling. NMR coupling constants (J) are reported in Hertz (Hz), and splitting patterns are indicated as follows: br, broad; s, singlet; d, doublet; dd, doublet of doublet; ddd, doublet of doublet of doublet; dt, doublet of triplet; t, triplet; q, quartet; m, multiplet. High resolution mass spectrometric measurements (HRMS) were performed by the AB SCIEX, Triple TOF 5600+. Enantiomeric excesses were determined by HPLC analysis on Shimadzu HPLC units, including the following instruments: pump, LC-16; detector, SPD-16; column, Daicel Chiralpak AD-H, OD-H, OJ-H, and IC.

**Scheme 1. Catalyst screening<sup>a</sup>**

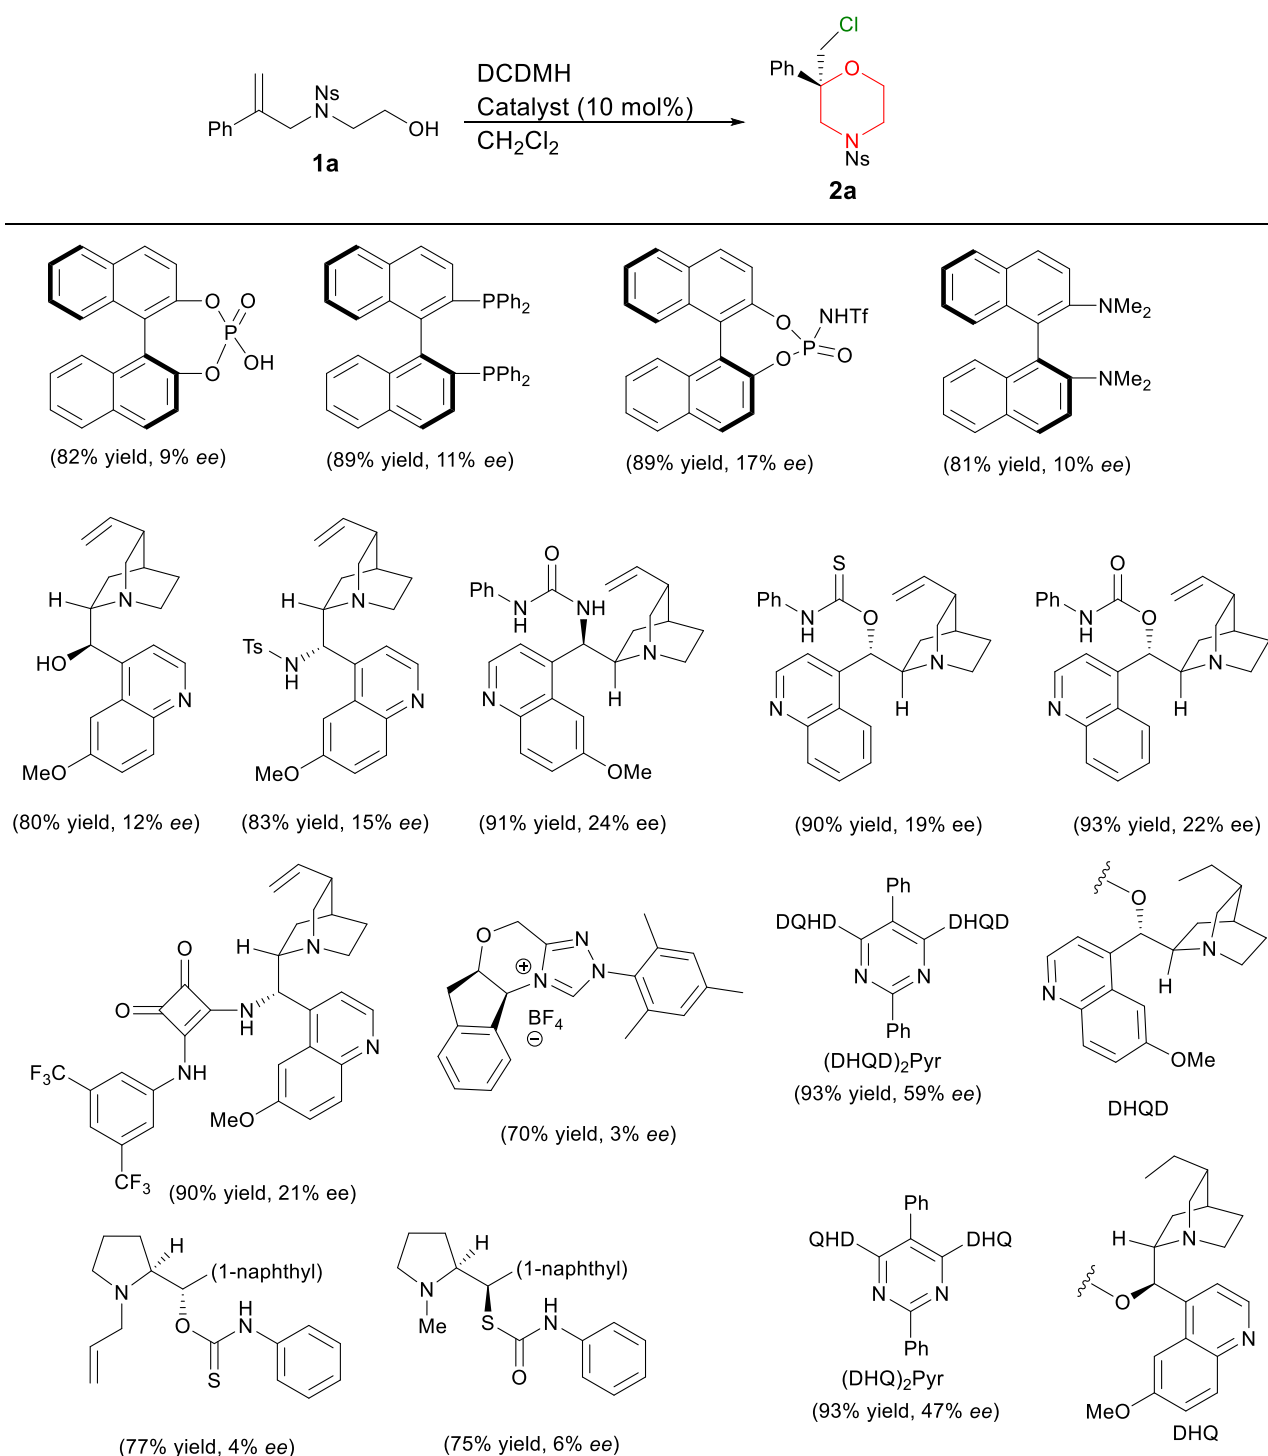

<sup>a</sup> Reactions were carried out with substrate **1a** (0.1 mmol), catalyst (0.01 mmol), and DCDMH (0.12 mmol) in  $\text{CH}_2\text{Cl}_2$  (4 mL). The yield was isolated yield and the ee was determined by chiral HPLC.



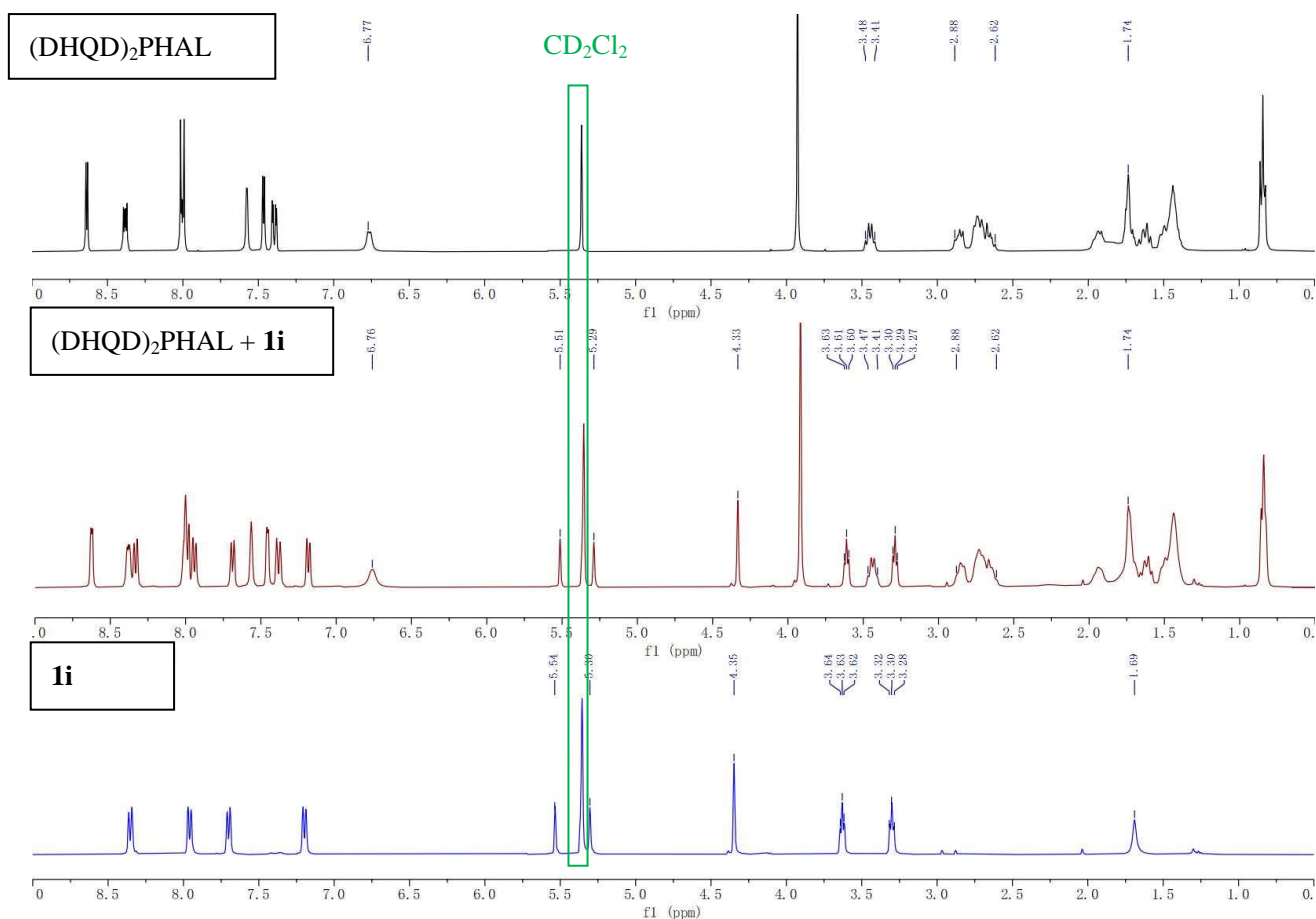

**Figure 1.**  $^1\text{H-NMR}$  analysis of  $(\text{DHQd})_2\text{PHAL}$  and  $\mathbf{1i}$

### Evaluation of antibacterial activity.

The compounds were diluted in 10% DMSO and  $2\mu\text{L}$  of the dilution was added to a  $200\mu\text{L}$  reaction so that the final concentration of DMSO is 0.1% in all of reactions. Minimum inhibitory concentrations (MIC) for compounds were determined following Luria-Bertani broth dilution guidelines. MIC values were determined as the lowest concentration of inhibitor to prevent visible *Staphylococcus aureus* growth after 18 h of incubation at  $37\text{ }^\circ\text{C}$ .  $\text{OD}_{550\text{nm}}$  absorbance signal was measured using a multi-well spectrophotometer (Molecular Devices SpectraMax M5 microplate reader).

The compounds were diluted in 10% DMSO and  $2\mu\text{L}$  of the dilution was added to a  $200\mu\text{L}$  reaction so that the final concentration of DMSO is 0.1% in all of reactions. Minimum inhibitory concentrations (MIC) for compounds were determined following Luria-Bertani broth dilution guidelines. MIC values were determined as the lowest concentration of inhibitor to prevent visible *Staphylococcus aureus* (MRSA) growth after 18 h of incubation at  $37\text{ }^\circ\text{C}$ .  $\text{OD}_{550\text{nm}}$  absorbance signal was measured using a multi-well spectrophotometer (Molecular Devices SpectraMax M5 microplate reader).

*Staphylococcus aureus* MIC results table

| Compound               | MIC                    |
|------------------------|------------------------|
| <b>2h</b>              | 1000 $\mu\text{g/ml}$  |
| <b>4</b>               | 33 $\mu\text{g/ml}$    |
| <b>PhSSPh</b>          | >1000 $\mu\text{g/ml}$ |
| Benzylpenicilin sodium | 0.003 $\mu\text{g/ml}$ |

*Staphylococcus aureus* (MRSA) MIC results table

| Compound               | MIC                   |
|------------------------|-----------------------|
| <b>2h</b>              | 1000 $\mu\text{g/ml}$ |
| <b>4</b>               | 33 $\mu\text{g/ml}$   |
| Benzylpenicilin sodium | 0.1 $\mu\text{g/ml}$  |

**Table 1** Substrate Scope<sup>a</sup>

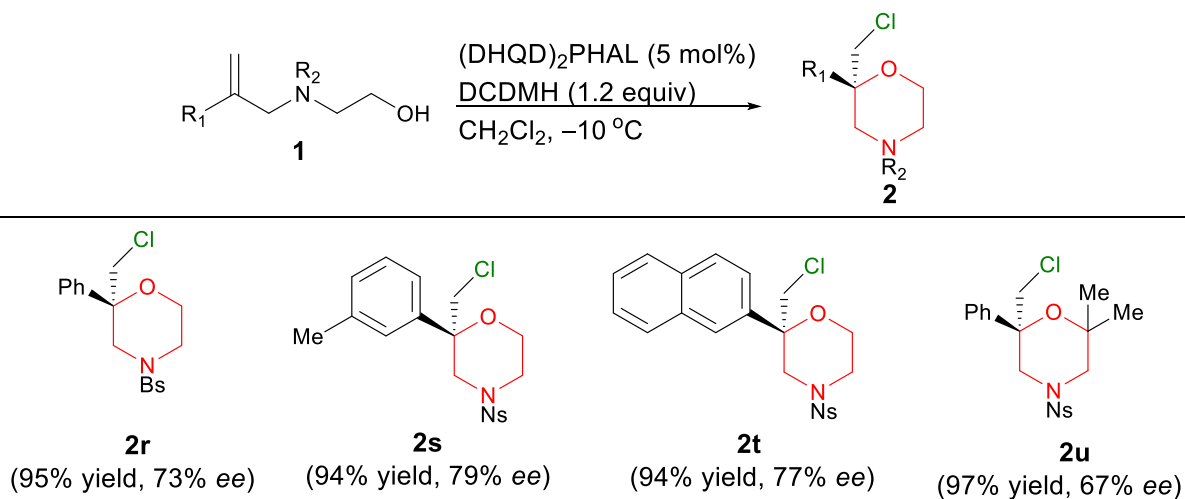

<sup>a</sup> Reactions were carried out with substrate **1** (0.1 mmol), (DHQD)<sub>2</sub>PHAL (0.005 mmol), and DCDMH (0.12 mmol) in CH<sub>2</sub>Cl<sub>2</sub> (4 mL) at -10 °C. The yield is isolated yield and the ee was determined by chiral HPLC.

# SYNTHESIS OF ALKENOL SUBSTRATES AND ASYMMETRIC CHLOROCYCLOETHERIFICATION REACTIONS

## General Procedure for the Synthesis of Alkenol Substrates.

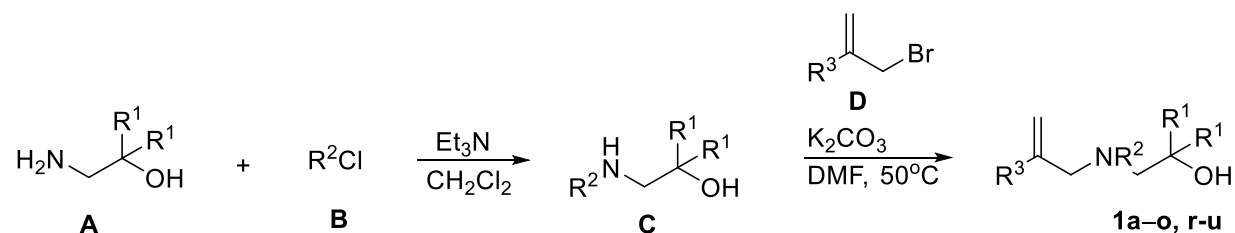

To a solution of **A** (2.0 mmol, 1.0 equiv) and  $\text{Et}_3\text{N}$  (202.2 mg, 2.0 mmol, 1.0 equiv) in  $\text{CH}_2\text{Cl}_2$  (5.0 mL) was added **B** (2.0 mmol, 1.0 equiv) at room temperature. The mixture was then stirred for 2 h at room temperature. Water (10.0 mL) and EtOAc (15.0 mL) were added. The organic layer was washed with water, and dried over magnesium sulfate. Concentration of the organic layer offered the crude product **C**, which was used without further purification.

To a solution of **C** (1.0 mmol, 1.0 equiv) and  $\text{K}_2\text{CO}_3$  (138.0 mg, 1.0 mmol, 1.0 equiv) in DMF (2.0 mL) was added **D** (1.0 mmol, 1.0 equiv) at room temperature. The mixture was then stirred for 24 h at  $50^\circ\text{C}$ . Water (10.0 mL) and EtOAc (15.0 mL) were added. The organic layer was washed with water, and dried over magnesium sulfate. Concentration of the organic layer offered the crude product that was further purified by flash column chromatography (hexane/EtOAc) to give the pure alkenol substrates **1a–t**.

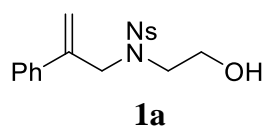

322.2 mg, 89%, yellow solid; MP  $146–147^\circ\text{C}$ ;  $^1\text{H}$  NMR ( $\text{CDCl}_3$ , 400 MHz):  $\delta$  8.30 (d,  $J = 12.0$  Hz, 2H), 7.92 (d,  $J = 8.0$  Hz, 2H), 7.39–7.31 (m, 5H), 5.49 (s, 1H), 5.25 (s, 1H), 4.39 (s, 2H), 3.68 (t,  $J = 4.0$  Hz, 2H), 3.32 (t,  $J = 4.0$  Hz, 2H);  $^{13}\text{C}$  NMR ( $\text{CDCl}_3$ , 100 MHz):  $\delta$  150.0, 144.9, 142.5, 137.9, 128.7, 128.5, 128.4, 126.5, 124.3, 117.5, 60.5, 52.9, 49.5; HRMS (TOF)  $m/z$ :  $[\text{M} + \text{H}]^+$  Calcd for  $\text{C}_{17}\text{H}_{18}\text{N}_2\text{O}_5\text{S}$  363.1755; found 363.1756.

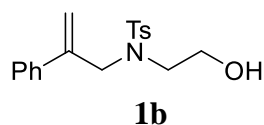

304.5 mg, 92%, yellow solid; MP  $113–114^\circ\text{C}$ ;  $^1\text{H}$  NMR ( $\text{CDCl}_3$ , 400 MHz):  $\delta$  7.71–7.32 (m, 9H), 5.52 (s, 1H), 5.25 (s, 1H), 4.27 (s, 2H), 3.60 (t,  $J = 4.0$  Hz, 2H), 3.20 (t,  $J = 4.0$  Hz, 2H), 2.46 (s, 3H);  $^{13}\text{C}$  NMR ( $\text{CDCl}_3$ , 100 MHz):  $\delta$  143.7, 143.1, 137.8, 135.2, 129.8, 128.6, 128.3, 127.6, 126.5, 116.8, 61.0, 53.7, 50.2, 21.6; HRMS (TOF)  $m/z$ :  $[\text{M} + \text{H}]^+$  Calcd for  $\text{C}_{18}\text{H}_{21}\text{NO}_3\text{S}$  332.4927; found 332.4928.

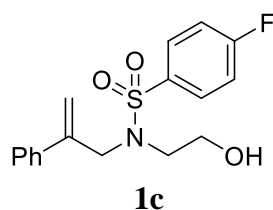

304.9 mg, 91%, white solid; MP 109–110 °C;  $^1\text{H}$  NMR ( $\text{CDCl}_3$ , 400 MHz):  $\delta$  7.81-7.16 (m, 9H), 5.51 (s, 1H), 5.25 (s, 1H), 4.30 (s, 2H), 3.63 (t,  $J = 4.0$  Hz, 2H), 3.23 (t,  $J = 8.0$  Hz, 2H), 2.11 (s, broad, 1H);  $^{13}\text{C}$  NMR ( $\text{CDCl}_3$ , 100 MHz):  $\delta$  166.4 (d,  $J = 253.0$  Hz), 142.9, 137.9, 134.6, 130.2 (d,  $J = 10.0$  Hz), 128.6 (d,  $J = 29.0$  Hz), 126.5, 117.0, 116.5 (d,  $J = 22.0$  Hz), 60.8, 53.3, 49.9; HRMS (TOF)  $m/z$ :  $[\text{M}+\text{H}]^+$  Calcd for  $\text{C}_{17}\text{H}_{18}\text{FNO}_3\text{S}$  336.7719; found 336.7720.

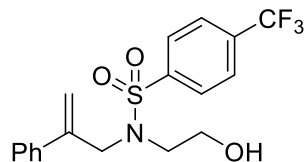

**1d**

365.8 mg, 94%, white solid; MP 122–123 °C;  $^1\text{H}$  NMR ( $\text{CDCl}_3$ , 400 MHz):  $\delta$  7.89-7.31 (m, 9H), 5.49 (s, 1H), 5.26 (s, 1H), 4.35 (s, 2H), 3.66 (t,  $J = 4.0$  Hz, 2H), 3.29 (t,  $J = 8.0$  Hz, 2H), 2.06 (s, broad, 1H);  $^{13}\text{C}$  NMR ( $\text{CDCl}_3$ , 100 MHz):  $\delta$  142.7, 137.9, 128.6, 128.4, 127.9, 126.5, 126.3 (q,  $J = 40.0$  Hz), 117.4, 60.7, 53.2, 49.7; HRMS (TOF)  $m/z$ :  $[\text{M}+\text{H}]^+$  Calcd for  $\text{C}_{18}\text{H}_{18}\text{F}_3\text{NO}_3\text{S}$  386.4971; found 386.4972.

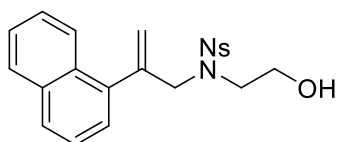

**1e**

362.6 mg, 88%, yellow solid; MP 168–169 °C;  $^1\text{H}$  NMR ( $\text{CDCl}_3$ , 400 MHz):  $\delta$  7.78-7.13 (m, 11H), 5.65 (s, 1H), 5.32 (s, 1H), 4.45 (s, 2H), 3.91 (t,  $J = 4.0$  Hz, 2H), 3.61 (t,  $J = 4.0$  Hz, 2H), 2.52 (s, broad, 1H);  $^{13}\text{C}$  NMR ( $\text{CDCl}_3$ , 100 MHz):  $\delta$  149.0, 145.1, 142.3, 137.2, 133.6, 130.8, 128.4, 128.2, 127.4, 126.4, 126.1, 125.8, 125.2, 124.6, 123.4, 121.5, 60.5, 54.0, 48.4; HRMS (TOF)  $m/z$ :  $[\text{M}+\text{H}]^+$  Calcd for  $\text{C}_{21}\text{H}_{20}\text{N}_2\text{O}_5\text{S}$  413.7411; found 413.7412.

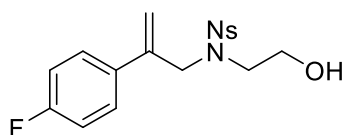

**1f**

330.6 mg, 87%, yellow solid; MP 130–131 °C;  $^1\text{H}$  NMR ( $\text{CDCl}_3$ , 400 MHz):  $\delta$  8.34 (d,  $J = 8.0$  Hz, 2H), 7.97 (d,  $J = 8.0$  Hz, 2H), 7.42-7.01 (m, 4H), 5.46 (s, 1H), 5.23 (s, 1H), 4.34 (s, 2H), 3.65 (t,  $J = 4.0$  Hz, 2H), 3.30 (t,  $J = 4.0$  Hz, 2H), 1.94 (s, broad, 1H);  $^{13}\text{C}$  NMR ( $\text{CDCl}_3$ , 100 MHz):  $\delta$  164.0 (d,  $J = 247.0$  Hz), 164.0, 150.1, 144.8, 141.6, 133.8, 128.6, 128.3 (d,  $J = 8.0$  Hz), 124.3, 117.3, 115.7 (d,  $J = 21.0$  Hz), 60.6, 53.2, 49.7; HRMS (TOF)  $m/z$ :  $[\text{M}+\text{H}]^+$  Calcd for  $\text{C}_{17}\text{H}_{17}\text{FN}_2\text{O}_5\text{S}$  381.5014; found 381.5015.

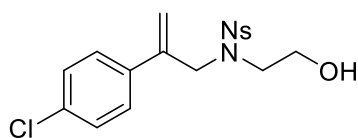

**1g**

352.4 mg, 89%, yellow oil;  $^1\text{H}$  NMR ( $\text{CDCl}_3$ , 400 MHz):  $\delta$  8.35 (d,  $J = 8.0$  Hz, 2H), 7.97 (d,  $J = 8.0$  Hz, 2H), 7.37-7.28 (m, 4H), 5.50 (s, 1H), 5.27 (s, 1H), 4.35 (s, 2H), 3.67 (t,  $J = 4.0$  Hz, 2H), 3.31 (t,  $J = 4.0$  Hz, 2H), 1.82 (s, broad, 1H);  $^{13}\text{C}$  NMR ( $\text{CDCl}_3$ , 100 MHz):  $\delta$  150.1, 144.8, 141.6, 136.2, 134.5, 128.8, 128.5, 127.8, 124.3, 117.8, 60.7, 53.1, 49.6; HRMS (TOF)  $m/z$ :  $[\text{M}+\text{H}]^+$  Calcd for  $\text{C}_{17}\text{H}_{17}\text{ClN}_2\text{O}_5\text{S}$  397.4425; found 397.4426.

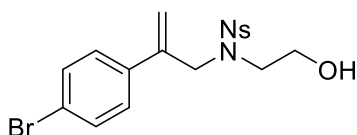

**1h**

378.4 mg, 86%, yellow solid; MP 161–162 °C;  $^1\text{H}$  NMR ( $\text{CDCl}_3$ , 400 MHz):  $\delta$  8.34 (d,  $J = 8.0$  Hz, 2H), 7.97 (d,  $J = 8.0$  Hz, 2H), 7.61-7.53 (m, 4H), 5.59 (s, 1H), 5.8 (s, 1H), 4.40 (s, 2H), 3.67 (t,  $J = 4.0$  Hz, 2H), 3.33 (t,  $J = 4.0$  Hz, 2H), 1.90 (s, broad, 1H);  $^{13}\text{C}$  NMR ( $\text{CDCl}_3$ , 100 MHz):  $\delta$  150.1, 144.8, 141.6, 141.4, 128.5, 126.9, 125.6 (t,  $J = 4.0$  Hz), 124.3, 119.1, 60.6, 52.9, 49.6; HRMS (TOF)  $m/z$ :  $[\text{M}+\text{H}]^+$  Calcd for  $\text{C}_{17}\text{H}_{17}\text{BrN}_2\text{O}_5\text{S}$  441.2986; found 441.2987.

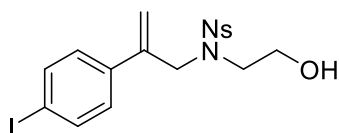

**1i**

434.3 mg, 89%, yellow solid; MP 192–193 °C;  $^1\text{H}$  NMR ( $\text{CDCl}_3$ , 400 MHz):  $\delta$  8.35 (dd,  $J_1 = 8.0$  Hz,  $J_1 = 160.0$  Hz, 4H), 7.68 (dd,  $J_1 = 8.0$  Hz,  $J_1 = 204.0$  Hz, 4H), 5.51 (s, 1H), 5.32 (s, 1H), 4.34 (s, 2H), 3.67 (t,  $J = 4.0$  Hz, 2H), 3.31 (t,  $J = 8.0$  Hz, 2H), 1.83 (s, broad, 1H);  $^{13}\text{C}$  NMR ( $\text{CDCl}_3$ , 100 MHz):  $\delta$  150.1, 144.7, 137.8, 137.3, 128.5, 128.3, 124.4, 118.0, 94.3, 60.6, 53.0, 49.6; HRMS (TOF)  $m/z$ :  $[\text{M}+\text{H}]^+$  Calcd for  $\text{C}_{17}\text{H}_{17}\text{IN}_2\text{O}_5\text{S}$  489.3044; found 489.3045.

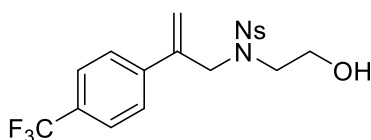

**1j**

374.1 mg, 87%, yellow solid; MP 147–148 °C;  $^1\text{H}$  NMR ( $\text{CDCl}_3$ , 400 MHz):  $\delta$  8.34 (d,  $J = 8.0$  Hz, 2H), 7.97 (d,  $J = 8.0$  Hz, 2H), 7.61-7.53 (m, 4H), 5.59 (s, 1H), 5.38 (s, 1H), 4.40 (s, 2H), 3.67 (t,  $J = 4.0$  Hz, 2H), 3.33 (t,  $J = 4.0$  Hz, 2H), 1.90 (s, broad, 1H);  $^{13}\text{C}$  NMR ( $\text{CDCl}_3$ , 100 MHz):  $\delta$  150.1, 144.8, 141.6, 141.4, 128.5, 126.9, 125.6 (d,  $J = 4.0$  Hz), 124.3, 119.1, 60.6, 52.9, 49.6; HRMS (TOF)  $m/z$ :  $[\text{M}+\text{H}]^+$  Calcd for  $\text{C}_{18}\text{H}_{17}\text{F}_3\text{N}_2\text{O}_5\text{S}$  431.4750; found 431.4751.

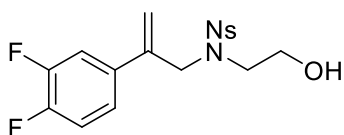

**1k**

350.2 mg, 88%, yellow solid; MP 147–148 °C;  $^1\text{H}$  NMR ( $\text{CDCl}_3$ , 400 MHz):  $\delta$  8.83 (d,  $J = 12.0$  Hz, 2H), 8.01 (d,  $J = 8.0$  Hz, 2H), 7.28-7.11 (m, 3H), 5.50 (s, 1H), 5.29 (s, 1H), 4.31 (s, 2H), 3.66 (t,  $J =$

4.0 Hz, 2H), 3.31 (t,  $J = 4.0$  Hz, 2H);  $^{13}\text{C}$  NMR ( $\text{CDCl}_3$ , 100 MHz):  $\delta$  151.5 (d,  $J = 240.0$  Hz), 150.1, 149.0, 144.7, 140.7, 134.8, 128.6, 124.4, 122.7, 122.6, 118.2, 117.6 (d,  $J = 18.0$  Hz), 115.6 (d,  $J = 18.0$  Hz), 60.7, 53.1, 49.7; HRMS (TOF)  $m/z$ :  $[\text{M}+\text{H}]^+$  Calcd for  $\text{C}_{17}\text{H}_{16}\text{F}_2\text{N}_2\text{O}_5\text{S}$  399.2945; found 399.2946.

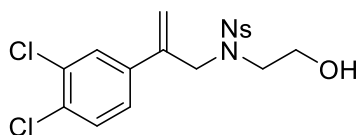

### 1l

387.0 mg, 90%, yellow solid; MP 155–156 °C;  $^1\text{H}$  NMR ( $\text{CDCl}_3$ , 400 MHz):  $\delta$  8.35 (d,  $J = 8.0$  Hz, 2H), 7.97 (d,  $J = 8.0$  Hz, 2H), 7.43–7.26 (m, 3H), 5.53 (s, 1H), 5.33 (s, 1H), 4.33 (s, 2H), 3.70 (t,  $J = 4.0$  Hz, 2H), 3.34 (t,  $J = 4.0$  Hz, 2H);  $^{13}\text{C}$  NMR ( $\text{CDCl}_3$ , 100 MHz):  $\delta$  150.1, 144.8, 140.6, 137.9, 132.8, 132.6, 130.6, 128.5, 128.4, 125.8, 124.4, 118.9, 60.6, 52.8, 49.6; HRMS (TOF)  $m/z$ :  $[\text{M}+\text{H}]^+$  Calcd for  $\text{C}_{17}\text{H}_{16}\text{Cl}_2\text{N}_2\text{O}_5\text{S}$  431.5090; found 431.5089.

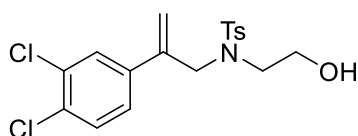

### 1m

363.1 mg, 91%, yellow solid; MP 126–127 °C;  $^1\text{H}$  NMR ( $\text{CDCl}_3$ , 400 MHz):  $\delta$  7.69–7.31 (m, 7H), 5.51 (s, 1H), 5.32 (s, 1H), 4.22 (s, 2H), 3.62 (t,  $J = 4.0$  Hz, 2H), 3.21 (t,  $J = 4.0$  Hz, 2H), 2.46 (s, 3H), 2.08 (s, broad, 1H);  $^{13}\text{C}$  NMR ( $\text{CDCl}_3$ , 100 MHz):  $\delta$  144.0, 141.1, 138.0, 135.3, 132.7, 132.3, 130.5, 130.0, 128.4, 127.4, 127.1, 125.9, 118.4; HRMS (TOF)  $m/z$ :  $[\text{M}+\text{H}]^+$  Calcd for  $\text{C}_{18}\text{H}_{19}\text{Cl}_2\text{NO}_3\text{S}$  400.6237; found 400.6238.

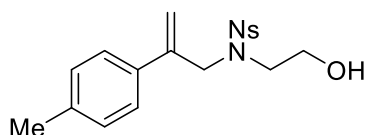

### 1n

349.7 mg, 93%, yellow oil;  $^1\text{H}$  NMR ( $\text{CDCl}_3$ , 400 MHz):  $\delta$  8.24 (d,  $J = 12.0$  Hz, 2H), 7.91 (d,  $J = 8.0$  Hz, 2H), 7.25 (d,  $J = 12.0$  Hz, 2H), 7.09 (d,  $J = 32.0$  Hz, 2H), 5.42 (s, 1H), 5.19 (s, 1H), 4.34 (s, 2H), 3.65 (t,  $J = 4.0$  Hz, 2H), 3.33 (t,  $J = 4.0$  Hz, 2H), 2.55 (s, 1H), 2.31 (s, 3H);  $^{13}\text{C}$  NMR ( $\text{CDCl}_3$ , 100 MHz):  $\delta$  149.8, 145.0, 142.3, 138.3, 135.1, 129.3, 128.5, 126.3, 124.3, 116.7, 60.4, 52.8, 49.4, 21.1; HRMS (TOF)  $m/z$ :  $[\text{M}+\text{H}]^+$  Calcd for  $\text{C}_{18}\text{H}_{20}\text{N}_2\text{O}_5\text{S}$  377.4129; found 377.4130.

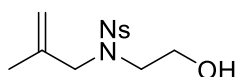

### 1o

249.0 mg, 83%, white solid; MP 93–94 °C;  $^1\text{H}$  NMR ( $\text{CDCl}_3$ , 400 MHz):  $\delta$  8.38 (d,  $J = 8.0$  Hz, 2H), 8.06 (d,  $J = 8.0$  Hz, 2H), 4.96 (s, 1H), 4.89 (s, 1H), 3.84 (s, 2H), 3.74 (t,  $J = 4.0$  Hz, 2H), 3.34 (t,  $J = 4.0$  Hz, 2H), 1.71 (m, 3H);  $^{13}\text{C}$  NMR ( $\text{CDCl}_3$ , 100 MHz):  $\delta$  150.0, 145.4, 139.9, 128.5, 124.4, 115.3, 60.6, 55.4, 50.0, 19.8; HRMS (TOF)  $m/z$ :  $[\text{M}+\text{H}]^+$  Calcd for  $\text{C}_{12}\text{H}_{16}\text{N}_2\text{O}_5\text{S}$  301.6912; found 301.6913.

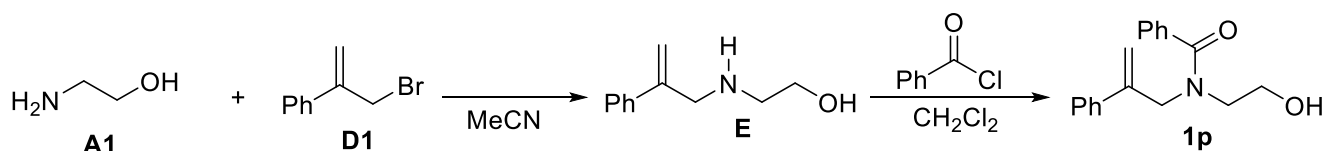

To a solution of **A1** (610.1 mg, 10.0 mmol, 3.3 equiv) in MeCN (10.0 mL) was added **D1** (588.0 mg, 3.0 mmol, 1.0 equiv) at room temperature. The mixture was then stirred for 2 h at room temperature. After removal of MeCN, water (30.0 mL) and EtOAc (50.0 mL) were added. The organic layer was washed with water, and dried over magnesium sulfate. Concentration of the organic layer offered the crude product that was further purified by flash column chromatography (hexane/EtOAc) to give the pure alkenol substrates **E**. 318.6 mg, 60%, yellow oil;  $^1\text{H}$  NMR ( $\text{CDCl}_3$ , 400 MHz):  $\delta$  7.45-7.29 (m, 5H), 5.43 (s, 1H), 5.34 (s, 1H), 5.26 (s, 1H), 3.71 (s, 2H), 3.64 (t,  $J = 4.0$  Hz, 2H), 2.81 (t,  $J = 4.0$  Hz, 2H), 2.16 (s, 1H, contains  $\text{H}_2\text{O}$ );  $^{13}\text{C}$  NMR ( $\text{CDCl}_3$ , 100 MHz):  $\delta$  146.1, 139.6, 128.5, 127.8, 126.2, 113.8, 60.8, 52.9, 50.2; HRMS (TOF)  $m/z$ :  $[\text{M}+\text{H}]^+$  Calcd for  $\text{C}_{11}\text{H}_{15}\text{NO}$  178.6154; found 178.6153.

To a solution of **E** (137.0 mg, 1.0 mmol, 1.0 equiv) in  $\text{CH}_2\text{Cl}_2$  (4.0 mL) was added benzoyl chloride (140.7 mg, 1.0 mmol, 1.0 equiv) at room temperature. The mixture was then stirred for 2 h at room temperature. After removal of  $\text{CH}_2\text{Cl}_2$ , water (10.0 mL) and EtOAc (15.0 mL) were added. The organic layer was washed with water, and dried over magnesium sulfate. Concentration of the organic layer offered the crude product that was further purified by flash column chromatography (hexane/EtOAc) to give the pure alkenol substrates **1p**. 267.0 mg, 95%, yellow oil;  $^1\text{H}$  NMR ( $\text{CDCl}_3$ , 400 MHz):  $\delta$  7.61-7.27 (m, 10H), 6.49 (s, broad, 1H), 5.56 (s, 1H), 5.34 (s, 1H), 4.46 (s, 2H), 3.66-3.63 (m, 4H);  $^{13}\text{C}$  NMR ( $\text{CDCl}_3$ , 100 MHz):  $\delta$  167.4, 144.0, 138.3, 134.4, 131.4, 128.5, 128.0, 127.0, 126.1, 115.3, 73.1, 68.4, 39.7; HRMS (TOF)  $m/z$ :  $[\text{M}+\text{H}]^+$  Calcd for  $\text{C}_{18}\text{H}_{19}\text{NO}_2$  282.4761; found 282.4762.

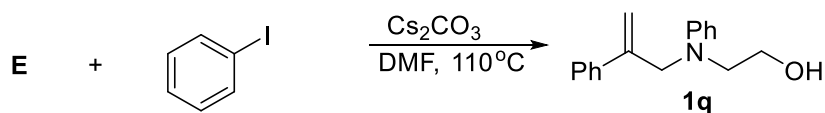

To a solution of **E** (137.0 mg, 1.0 mmol, 1.0 equiv) and  $\text{Cs}_2\text{CO}_3$  (651.6 mg, 2.0 mmol, 2.0 equiv) in DMF (2.0 mL) was added iodobenzene (408.0 mg, 2.0 mmol, 2.0 equiv) at room temperature. The mixture was then stirred for 8 h at  $110^\circ\text{C}$ . Water (10.0 mL) and EtOAc (15.0 mL) were added. The organic layer was washed with water, and dried over magnesium sulfate. Concentration of the organic layer offered the crude product that was further purified by flash column chromatography (hexane/EtOAc) to give the pure alkenol substrates **1q**. 179.6 mg, 71%, yellow oil;  $^1\text{H}$  NMR ( $\text{CDCl}_3$ , 400 MHz):  $\delta$  7.49-6.88 (m, 10H), 5.46 (s, 1H), 5.32 (s, 1H), 4.12 (t,  $J = 4.0$  Hz, 2H), 3.78 (s, 2H), 3.08 (m, 4H), 1.96 (s, broad, 1H);  $^{13}\text{C}$  NMR ( $\text{CDCl}_3$ , 100 MHz):  $\delta$  158.8, 146.1, 139.8, 129.5, 128.5, 127.8, 126.2, 120.8, 114.5, 113.6, 67.1, 53.3, 48.0; HRMS (TOF)  $m/z$ :  $[\text{M}+\text{H}]^+$  Calcd for  $\text{C}_{17}\text{H}_{19}\text{NO}$  254.7139; found 254.7140.

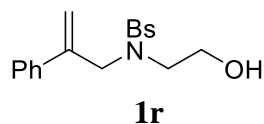

288.5 mg, 91%, yellow solid; MP 104–105 °C;  $^1\text{H}$  NMR ( $\text{CDCl}_3$ , 400 MHz):  $\delta$  7.82-7.32 (m, 10H), 5.51 (s, 1H), 5.25 (s, 1H), 4.29 (s, 2H), 3.61 (t,  $J = 4.0$  Hz, 2H), 3.22 (t,  $J = 4.0$  Hz, 2H), 2.05 (s, broad, 1H);  $^{13}\text{C}$  NMR ( $\text{CDCl}_3$ , 100 MHz):  $\delta$  143.0, 138.3, 137.8, 132.9, 129.2, 128.6, 128.3, 127.5, 126.5, 116.9, 60.9, 53.6, 50.1; HRMS (TOF)  $m/z$ :  $[\text{M}+\text{H}]^+$  Calcd for  $\text{C}_{17}\text{H}_{19}\text{NO}_3\text{S}$  318.5124; found 318.5123.

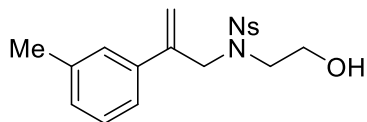

**1s**

349.7 mg, 93%, yellow oil;  $^1\text{H}$  NMR ( $\text{CDCl}_3$ , 400 MHz):  $\delta$  8.26 (d,  $J = 12.0$  Hz, 2H), 7.90 (d,  $J = 8.0$  Hz, 2H), 7.21-7.11 (m, 4H), 5.44 (s, 1H), 5.21 (s, 1H), 4.37 (s, 2H), 3.69 (t,  $J = 4.0$  Hz, 2H), 3.34 (t,  $J = 4.0$  Hz, 2H), 3.32 (s, 3H);  $^{13}\text{C}$  NMR ( $\text{CDCl}_3$ , 100 MHz):  $\delta$  149.9, 145.1, 142.6, 138.3, 138.0, 129.1, 128.5, 127.2, 124.2, 123.6, 117.2, 60.4, 52.8, 49.5, 21.4; HRMS (TOF)  $m/z$ :  $[\text{M}+\text{H}]^+$  Calcd for  $\text{C}_{18}\text{H}_{20}\text{N}_2\text{O}_5\text{S}$  377.4129; found 377.4128.

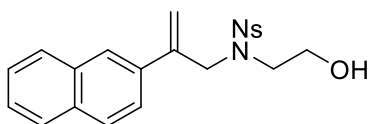

**1t**

370.8 mg, 90%, yellow solid; MP 161–162 °C;  $^1\text{H}$  NMR ( $\text{CDCl}_3$ , 400 MHz):  $\delta$  8.05-7.45 (m, 11H), 5.59 (s, 1H), 5.35 (s, 1H), 4.49 (s, 2H), 3.72 (t,  $J = 4.0$  Hz, 2H), 3.39 (t,  $J = 4.0$  Hz, 2H), 2.28 (s, broad, 1H);  $^{13}\text{C}$  NMR ( $\text{CDCl}_3$ , 100 MHz):  $\delta$  149.6, 145.1, 142.5, 135.3, 133.0, 128.3, 128.2, 128.1, 127.6, 126.6, 125.5, 124.5, 124.0, 118.3, 60.5, 52.9, 49.3; HRMS (TOF)  $m/z$ :  $[\text{M}+\text{H}]^+$  Calcd for  $\text{C}_{21}\text{H}_{20}\text{N}_2\text{O}_5\text{S}$  413.7411; found 413.7410.

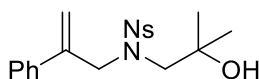

**1u**

354.9 mg, 91%, yellow oil;  $^1\text{H}$  NMR ( $\text{CDCl}_3$ , 400 MHz):  $\delta$  8.26 (d,  $J = 12.0$  Hz, 2H), 7.89 (d,  $J = 12.0$  Hz, 2H), 7.29-7.22 (m, 5H), 5.39 (s, 1H), 5.18 (s, 1H), 4.52 (t,  $J = 4.0$  Hz, 2H), 3.30 (s, 2H), 1.27 (s, 6H);  $^{13}\text{C}$  NMR ( $\text{CDCl}_3$ , 100 MHz):  $\delta$  149.9, 145.3, 142.7, 138.7, 128.6, 128.5, 128.3, 126.5, 124.1, 117.5, 71.8, 58.1, 53.8, 27.9; HRMS (TOF)  $m/z$ :  $[\text{M}+\text{H}]^+$  Calcd for  $\text{C}_{19}\text{H}_{22}\text{N}_2\text{O}_5\text{S}$  391.6274; found 391.6275.

### General Procedure for the asymmetric chlorocycloetherification.

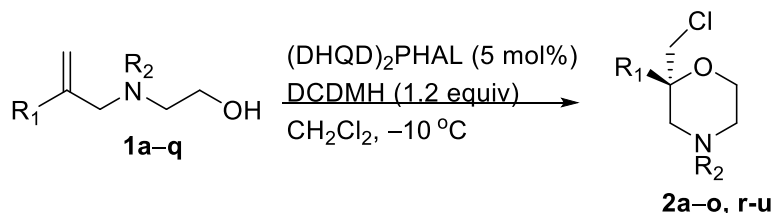

To a solution of **1a-o, r-u** (0.1 mmol, 1.0 equiv) and  $(\text{DHQD})_2\text{PHAL}$  (3.9 mg, 0.005 mmol, 0.05 equiv) in  $\text{CH}_2\text{Cl}_2$  (4.0 mL) was added DCDMH (23.6 mg, 1.2 mmol, 1.2 equiv) at  $-10$  °C. The mixture was then stirred for 2–3 days at  $-10$  °C. The reaction was quenched with saturated  $\text{Na}_2\text{SO}_3$  (1.0 mL) at  $-10$  °C. The solution was diluted with water (3.0 mL) and extracted with EtOAc,



dried over  $\text{MgSO}_4$  and concentrated in vacuo. The residue was purified by flash column chromatography (hexane/EtOAc) to yield the corresponding morpholines **2a–o**, **r–u**.

To a solution of **1a,b, l, r–u** (0.1 mmol, 1.0 equiv) and  $(\text{ECin})_2\text{PHAL}$  (3.6 mg, 0.005 mmol, 0.05 equiv) in  $\text{CH}_2\text{Cl}_2$  (4.0 mL) was added DCDMH (23.6 mg, 1.2 mmol, 1.2 equiv) at  $-10\text{ }^\circ\text{C}$ . The mixture was then stirred for 2–3 days at  $-10\text{ }^\circ\text{C}$ . The reaction was quenched with saturated  $\text{Na}_2\text{SO}_3$  (1.0 mL) at  $-10\text{ }^\circ\text{C}$ . The solution was diluted with water (3.0 mL) and extracted with EtOAc, dried over  $\text{MgSO}_4$  and concentrated in vacuo. The residue was purified by flash column chromatography (hexane/EtOAc) to yield the corresponding morpholines *ent*-**2a,b, l, r–u**.

#### Representative Procedure for the asymmetric chlorocycloetherification (1.0 mmol scale).

To a solution of **1a** (362.1 mg, 1.0 mmol, 1.0 equiv) and  $(\text{DHQD})_2\text{PHAL}$  (39.0 mg, 0.05 mmol, 0.05 equiv) in  $\text{CH}_2\text{Cl}_2$  (40.0 mL) was added DCDMH portionwise (236.2 mg, 1.2 mmol, 1.2 equiv) at  $-10\text{ }^\circ\text{C}$ . The mixture was then stirred for 3 days at  $-10\text{ }^\circ\text{C}$ . The reaction was quenched with saturated  $\text{Na}_2\text{SO}_3$  (10.0 mL) at  $-10\text{ }^\circ\text{C}$ . The solution was diluted with water (30.0 mL) and extracted with EtOAc, dried over  $\text{MgSO}_4$  and concentrated in vacuo. The residue was purified by flash column chromatography (hexane/EtOAc) to yield **2a**.

To a solution of **1a** (362.1 mg, 1.0 mmol, 1.0 equiv) and  $(\text{ECin})_2\text{PHAL}$  (36.0 mg, 0.05 mmol, 0.05 equiv) in  $\text{CH}_2\text{Cl}_2$  (40.0 mL) was added DCDMH portionwise (236.2 mg, 1.2 mmol, 1.2 equiv) at  $-10\text{ }^\circ\text{C}$ . The mixture was then stirred for 3 days at  $-10\text{ }^\circ\text{C}$ . The reaction was quenched with saturated  $\text{Na}_2\text{SO}_3$  (10.0 mL) at  $-10\text{ }^\circ\text{C}$ . The solution was diluted with water (30.0 mL) and extracted with EtOAc, dried over  $\text{MgSO}_4$  and concentrated in vacuo. The residue was purified by flash column chromatography (hexane/EtOAc) to yield *ent*-**2a**.

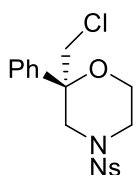

#### **2a**

386.1 mg (1.0 mmol scale), 97%, yellow solid; MP  $189\text{--}190\text{ }^\circ\text{C}$ ;  $[\alpha]_D^{25} = -19.2$  (*c* 1.0, MeOH, 82% ee);  $^1\text{H NMR}$  ( $\text{CDCl}_3$ , 400 MHz):  $\delta$  8.45 (d,  $J = 8.0$  Hz, 2H), 8.00 (d,  $J = 12.0$  Hz, 2H), 7.52–7.38 (m, 5H), 4.18–4.15 (m, 1H), 3.85–3.65 (m, 4H), 3.34–3.31 (m, 1H), 3.03 (d,  $J = 12.0$  Hz, 1H), 2.85–2.75 (m, 1H);  $^{13}\text{C NMR}$  ( $\text{CDCl}_3$ , 100 MHz):  $\delta$  150.5, 141.1, 137.5, 129.0, 128.6, 127.0, 124.6, 76.8, 60.9, 50.2, 49.1, 45.4; HRMS (TOF)  $m/z$ :  $[\text{M} + \text{H}]^+$  Calcd for  $\text{C}_{17}\text{H}_{17}\text{ClN}_2\text{O}_5\text{S}$  397.6944; found 397.6945; HPLC (Daicel Chiralcel AD-H, *i*-PrOH/Hexane = 35/65, 1.0 mL/min, 210 nm)  $t_1 = 10.9$  min (minor),  $t_2 = 14.5$  min (major).

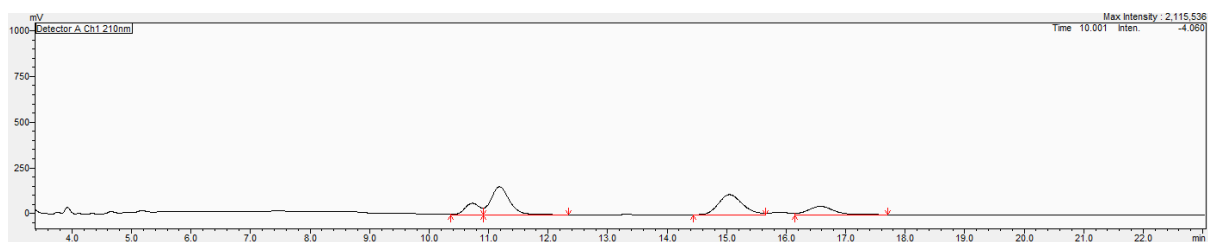

| Peak# | Ret. Time | Area    | Height | Mark | Conc.   |
|-------|-----------|---------|--------|------|---------|
| 1     | 10.725    | 1110079 | 63240  | V    | 12.129  |
| 2     | 11.185    | 3400306 | 153568 | V    | 37.153  |
| 3     | 15.047    | 3183638 | 110982 | V    | 34.785  |
| 4     | 16.574    | 1458250 | 46697  | V    | 15.933  |
| Total |           | 9152273 | 374486 |      | 100.000 |

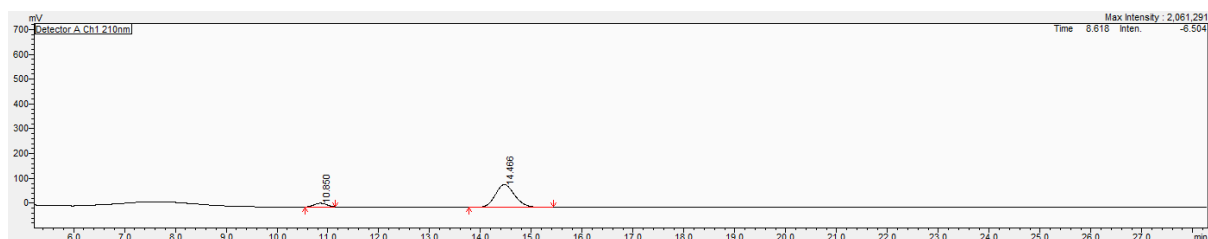

| Peak# | Ret. Time | Area    | Height | Mark | Conc.   |
|-------|-----------|---------|--------|------|---------|
| 1     | 10.850    | 250331  | 14638  | M    | 9.171   |
| 2     | 14.466    | 2479150 | 93072  | M    | 90.829  |
| Total |           | 2729480 | 107710 |      | 100.000 |

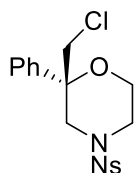

*ent-2a*

382.0 mg (1.0 mmol scale), 96%;  $[\alpha]_D^{25} = +18.9$  (*c* 1.0, MeOH, 82% ee); HPLC (Daicel Chiralcel AD-H, *i*-PrOH/Hexane = 35/65, 1.0 mL/min, 254 nm)  $t_1 = 11.3$  min (major),  $t_2 = 15.0$  min (minor).

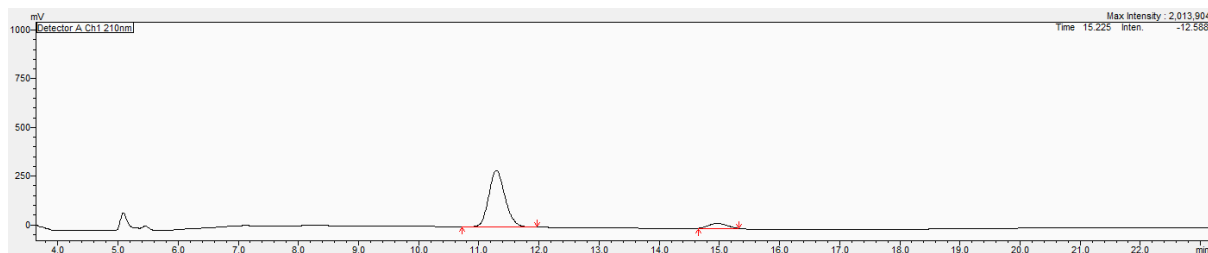

| Peak# | Ret. Time | Area    | Height | Mark | Conc.   |
|-------|-----------|---------|--------|------|---------|
| 1     | 11.291    | 5440536 | 289201 | M    | 91.073  |
| 2     | 14.965    | 533251  | 25167  | M    | 8.927   |
| Total |           | 5973787 | 314368 |      | 100.000 |

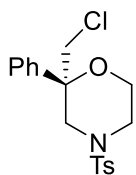

### 2b

34.7 mg, 95%, yellow solid; MP 177–178 °C;  $[\alpha]_D^{25} = -58.2$  (*c* 1.0, MeOH, 80% ee);  $^1\text{H}$  NMR ( $\text{CDCl}_3$ , 400 MHz):  $\delta$  7.69–7.34 (m, 9H), 4.03–4.00 (m, 1H), 3.83–3.68 (m, 4H), 3.23–3.20 (m, 1H), 3.00 (d, *J* = 12.0 Hz, 1H), 2.79–2.73 (m, 1H);  $^{13}\text{C}$  NMR ( $\text{CDCl}_3$ , 100 MHz):  $\delta$  144.1, 138.2, 132.1, 129.9, 128.8, 128.3, 127.9, 127.0, 76.7, 61.1, 50.0, 49.4, 45.5, 21.6; HRMS (TOF) *m/z*:  $[\text{M}+\text{H}]^+$  Calcd for  $\text{C}_{18}\text{H}_{20}\text{ClNO}_3\text{S}$  366.8199; found 366.8198; HPLC (Daicel Chiralcel OJ-H, *i*-PrOH/Hexane = 35/65, 1.0 mL/min, 210 nm)  $t_1 = 13.3$  min (minor),  $t_2 = 15.4$  min (major).

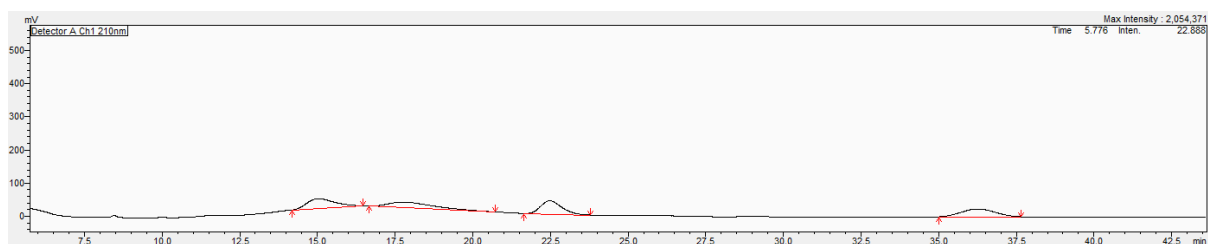

| Peak# | Ret. Time | Area    | Height | Mark | Conc.   |
|-------|-----------|---------|--------|------|---------|
| 1     | 15.038    | 1855689 | 29455  | M    | 25.458  |
| 2     | 17.804    | 1751268 | 17209  | M    | 24.025  |
| 3     | 22.477    | 1887734 | 39954  |      | 25.897  |
| 4     | 36.254    | 1794662 | 23717  | M    | 24.620  |
| Total |           | 7289352 | 110335 |      | 100.000 |

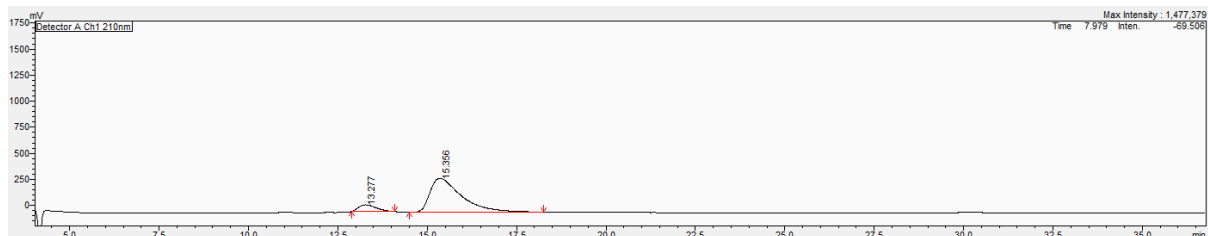

| Peak# | Ret. Time | Area     | Height | Mark | Conc.   |
|-------|-----------|----------|--------|------|---------|
| 1     | 13.277    | 2181589  | 63580  | M    | 9.915   |
| 2     | 15.356    | 19821288 | 324644 | M    | 90.085  |
| Total |           | 22002877 | 388225 |      | 100.000 |

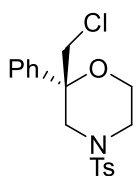

### ent-2b

34.7 mg, 95%;  $[\alpha]_D^{25} = +57.6$  (*c* 1.0, MeOH, 83% ee); HPLC (Daicel Chiralcel OJ-H, *i*-PrOH/Hexane = 35/65, 1.0 mL/min, 210 nm)  $t_1 = 14.0$  min (major),  $t_2 = 17.1$  min (minor).

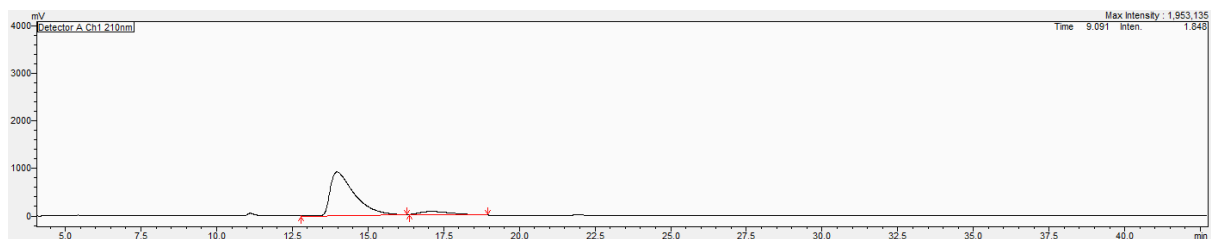

| Peak# | Ret. Time | Area     | Height | Mark | Conc.   |
|-------|-----------|----------|--------|------|---------|
| 1     | 13.980    | 50906385 | 917707 | M    | 91.413  |
| 2     | 17.091    | 4782089  | 65563  | M    | 8.587   |
| Total |           | 55688474 | 983271 |      | 100.000 |

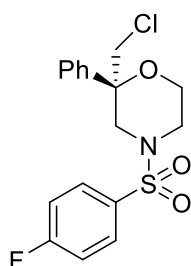

### 2c

33.7 mg, 91%, yellow solid; MP 182–183 °C;  $[\alpha]_D^{25} = +79.2$  ( $c$  1.0, MeOH, >99% ee);  $^1\text{H}$  NMR ( $\text{CDCl}_3$ , 400 MHz):  $\delta$  7.83-7.25 (m, 9H), 4.08 (d,  $J = 12.0$  Hz, 1H), 3.83-3.70 (m, 4H), 3.26-2.72 (m, 3H);  $^{13}\text{C}$  NMR ( $\text{CDCl}_3$ , 100 MHz):  $\delta$  166.8 (d,  $J = 254.0$  Hz), 137.9, 130.6 (d,  $J = 9.0$  Hz), 128.9, 128.5, 127.0, 116.8 (d,  $J = 22.0$  Hz), 76.8, 61.0, 50.1, 49.3, 45.5; HRMS (TOF)  $m/z$ :  $[\text{M} + \text{H}]^+$  Calcd for  $\text{C}_{17}\text{H}_{17}\text{ClFNO}_3\text{S}$  370.8264; found 370.8265; HPLC (Daicel Chiralcel AD-H,  $i$ -PrOH/Hexane = 1/99, 1.0 mL/min, 210 nm)  $t_1 = 10.4$  min (minor),  $t_2 = 11.9$  min (major).

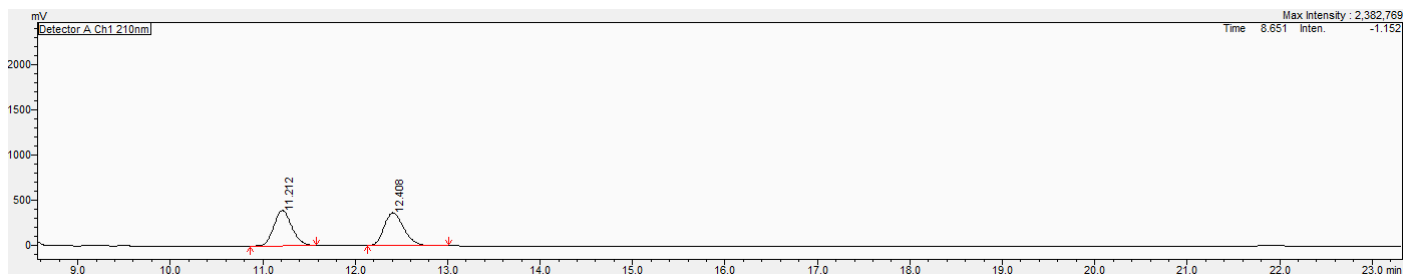

| Peak# | Ret. Time | Area     | Height | Mark | Conc.   |
|-------|-----------|----------|--------|------|---------|
| 1     | 11.212    | 5322769  | 392382 | M    | 49.559  |
| 2     | 12.408    | 5417519  | 365960 | M    | 50.441  |
| Total |           | 10740288 | 758342 |      | 100.000 |

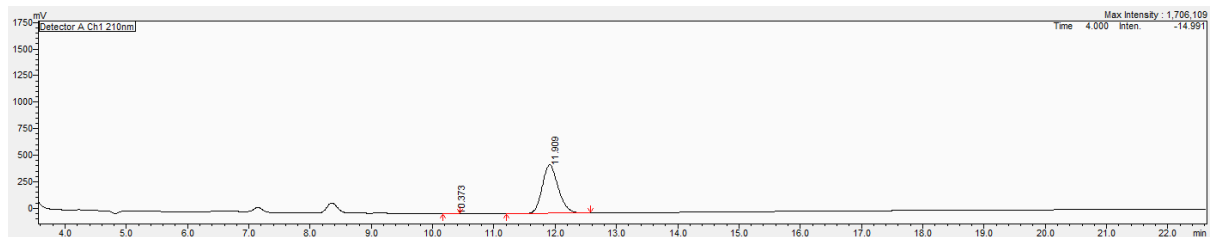

| Peak# | Ret. Time | Area    | Height | Mark | Conc.   |
|-------|-----------|---------|--------|------|---------|
| 1     | 10.373    | 2611    | 209    |      | 0.032   |
| 2     | 11.909    | 8269794 | 456004 | M    | 99.968  |
| Total |           | 8272405 | 456214 |      | 100.000 |

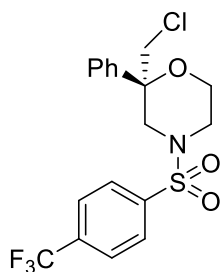

**2d**

38.5 mg, 92%, yellow solid; MP 189–190 °C;  $[\alpha]_D^{25} = +62.7$  (*c* 1.0, MeOH, 99.5% ee);  $^1\text{H}$  NMR ( $\text{CDCl}_3$ , 400 MHz):  $\delta$  7.95–7.86 (m, 4H), 7.53–7.36 (m, 5H), 4.14 (d, *J* = 12.0 Hz, 1H), 3.84–3.70 (m, 4H), 3.03–2.76 (m, 3H);  $^{13}\text{C}$  NMR ( $\text{CDCl}_3$ , 100 MHz):  $\delta$  138.9, 137.7, 135.1 (q, *J* = 32.0 Hz), 128.9, 128.5, 128.3, 127.0, 126.6, 126.5, 76.8, 60.9, 50.1, 49.2, 45.4; HRMS (TOF) *m/z*:  $[\text{M} + \text{H}]^+$  Calcd for  $\text{C}_{18}\text{H}_{17}\text{ClF}_3\text{NO}_3\text{S}$  420.6102; found 420.6103; HPLC (Daicel Chiralcel IC, *i*-PrOH/Hexane = 10/90, 1.0 mL/min, 210 nm)  $t_1 = 10.4$  min (minor),  $t_2 = 11.9$  min (major).

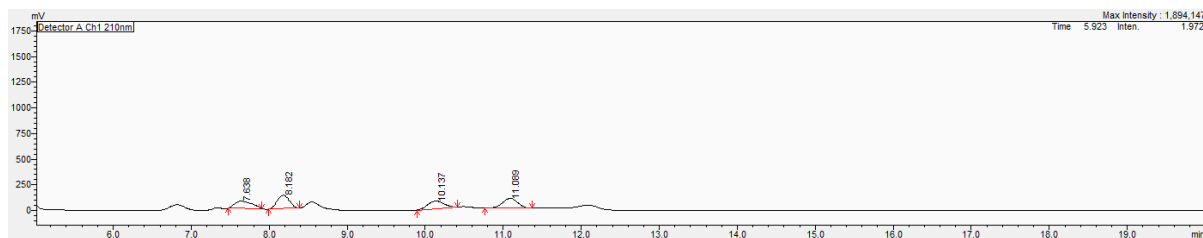

| Peak# | Ret. Time | Area    | Height | Mark | Conc.   |
|-------|-----------|---------|--------|------|---------|
| 1     | 7.638     | 1070441 | 69783  | M    | 21.961  |
| 2     | 8.182     | 1428180 | 130993 | M    | 29.300  |
| 3     | 10.137    | 1028040 | 71994  | M    | 21.091  |
| 4     | 11.089    | 1347605 | 97283  | M    | 27.647  |
| Total |           | 4874265 | 370053 |      | 100.000 |

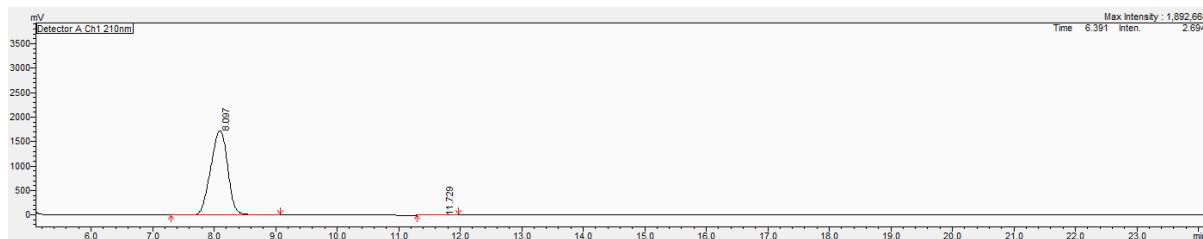

| Peak# | Ret. Time | Area     | Height  | Mark | Conc.   |
|-------|-----------|----------|---------|------|---------|
| 1     | 8.097     | 33107528 | 1716662 | M    | 99.725  |
| 2     | 11.729    | 91312    | 4778    | M    | 0.275   |
| Total |           | 33198840 | 1721440 |      | 100.000 |

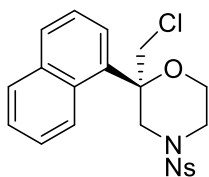

### 2e

36.6 mg, 82%, yellow solid; MP 204–205 °C;  $[\alpha]_D^{25} = -47.3$  (*c* 1.0, MeOH, 96% ee);  $^1\text{H}$  NMR ( $\text{CDCl}_3$ , 400 MHz):  $\delta$  8.74–8.71 (m, 1H), 8.50 (d,  $J = 12.0$  Hz, 2H), 8.06 (d,  $J = 8.0$  Hz, 2H), 7.91–7.50 (m, 6H), 4.74 (d,  $J = 12.0$  Hz, 1H), 4.07 (dd,  $J_1 = 12.0$  Hz,  $J_2 = 48.0$  Hz, 2H), 3.83–3.49 (m, 3H), 2.91 (d,  $J = 12.0$  Hz, 1H), 2.69–2.62 (m, 1H);  $^{13}\text{C}$  NMR ( $\text{CDCl}_3$ , 100 MHz):  $\delta$  150.6, 141.1, 135.0, 131.2, 130.8, 130.4, 129.7, 129.6, 129.1, 126.5, 125.6, 125.1, 125.0, 124.6, 79.7, 61.2, 50.2, 49.1, 45.3; HRMS (TOF)  $m/z$ :  $[\text{M} + \text{H}]^+$  Calcd for  $\text{C}_{21}\text{H}_{19}\text{ClN}_2\text{O}_5\text{S}$  447.8358; found 447.8359; HPLC (Daicel Chiralcel AD-H, *i*-PrOH/Hexane = 35/65, 1.0 mL/min, 254 nm)  $t_1 = 10.2$  min (minor),  $t_2 = 12.1$  min (major).

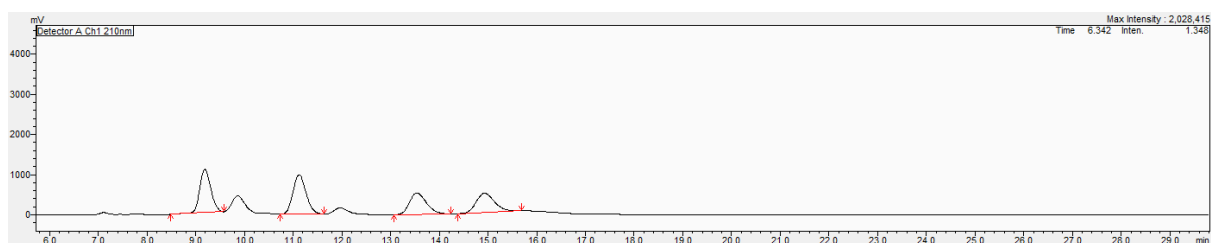

| Peak# | Ret. Time | Area     | Height  | Mark | Conc.   |
|-------|-----------|----------|---------|------|---------|
| 1     | 9.188     | 17300350 | 1083019 | M    | 28.374  |
| 2     | 11.125    | 18210912 | 979773  |      | 29.868  |
| 3     | 13.543    | 12853486 | 534943  |      | 21.081  |
| 4     | 14.930    | 12607172 | 477917  |      | 20.677  |
| Total |           | 60971919 | 3075652 |      | 100.000 |

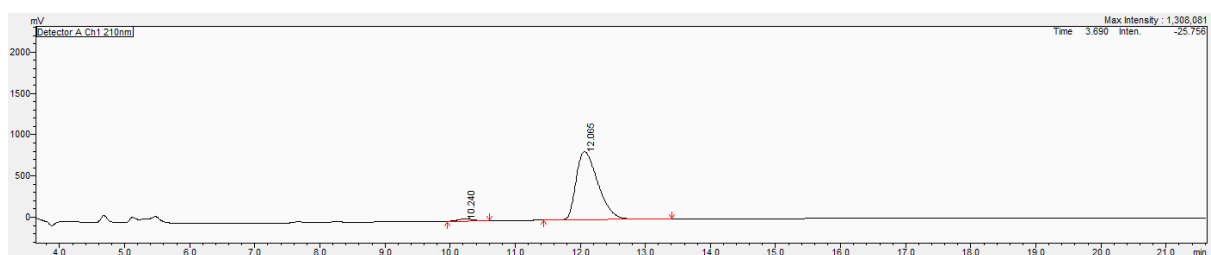

| Peak# | Ret. Time | Area     | Height | Mark | Conc.   |
|-------|-----------|----------|--------|------|---------|
| 1     | 10.240    | 394902   | 25469  | M    | 1.999   |
| 2     | 12.065    | 19359612 | 823628 | M    | 98.001  |
| Total |           | 19754514 | 849097 |      | 100.000 |

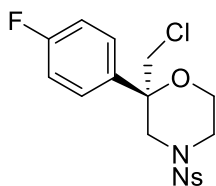

### 2f

39.3 mg, 95%, yellow solid; MP 172–173 °C;  $[\alpha]_D^{25} = +77.2$  ( $c$  1.0, MeOH, 90% ee);  $^1\text{H}$  NMR ( $\text{CDCl}_3$ , 400 MHz):  $\delta$  8.43 (d,  $J = 12.0$  Hz, 2H), 8.00 (d,  $J = 8.0$  Hz, 2H), 7.52–7.12 (m, 4H), 4.17–3.69 (m, 3H), 3.66 (s, 2H), 3.36–2.94 (m, 3H);  $^{13}\text{C}$  NMR ( $\text{CDCl}_3$ , 100 MHz):  $\delta$  163.9 (d,  $J = 248.0$  Hz), 150.5, 141.1, 133.3 (d,  $J = 3.0$  Hz), 129.1 (d,  $J = 9.0$  Hz), 124.6, 116.0 (d,  $J = 22.0$  Hz), 76.5, 60.9, 50.1, 49.3, 45.4; HRMS (TOF)  $m/z$ :  $[\text{M}+\text{H}]^+$  Calcd for  $\text{C}_{17}\text{H}_{16}\text{ClFN}_2\text{O}_5\text{S}$  415.3826; found 415.3827; HPLC (Daicel Chiralcel IC, *i*-PrOH/Hexane = 20/80, 1.0 mL/min, 210 nm)  $t_1 = 18.0$  min (major),  $t_2 = 16.0$  min (minor).

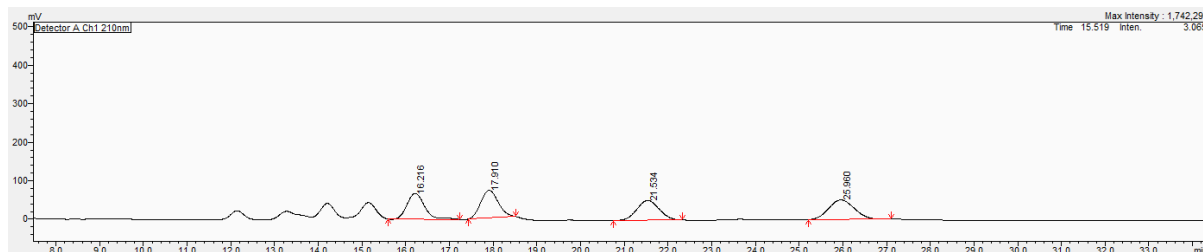

| Peak# | Ret. Time | Area    | Height | Mark | Conc.   |
|-------|-----------|---------|--------|------|---------|
| 1     | 16.216    | 1870215 | 67256  | M    | 24.073  |
| 2     | 17.910    | 2004615 | 71928  | M    | 25.803  |
| 3     | 21.534    | 1832932 | 51532  | M    | 23.593  |
| 4     | 25.960    | 2061115 | 50608  | M    | 26.530  |
| Total |           | 7768878 | 241323 |      | 100.000 |

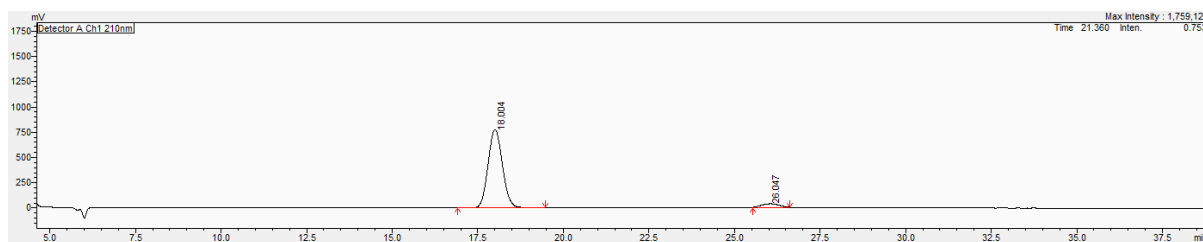

| Peak# | Ret. Time | Area     | Height | Mark | Conc.   |
|-------|-----------|----------|--------|------|---------|
| 1     | 18.004    | 22463327 | 776354 | M    | 94.762  |
| 2     | 26.047    | 1241760  | 35531  | M    | 5.238   |
| Total |           | 23705087 | 811885 |      | 100.000 |

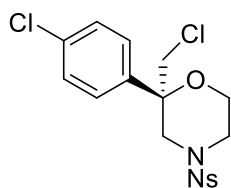

**2g**

41.3 mg, 96%, yellow solid; MP 177–178 °C;  $[\alpha]_D^{25} = +96.3$  ( $c$  1.0, MeOH, 91% ee);  $^1\text{H}$  NMR ( $\text{CDCl}_3$ , 400 MHz):  $\delta$  8.46 (d,  $J = 8.0$  Hz, 2H), 8.00 (d,  $J = 8.0$  Hz, 2H), 7.47–7.42 (m, 4H), 4.17–3.85 (m, 3H), 3.65 (s, 2H), 3.37–2.73 (m, 3H);  $^{13}\text{C}$  NMR ( $\text{CDCl}_3$ , 100 MHz):  $\delta$  150.5, 141.1, 136.1, 134.7, 129.0, 128.6, 124.6, 76.6, 61.0, 49.9, 49.2, 45.4; HRMS (TOF)  $m/z$ :  $[\text{M}+\text{H}]^+$  Calcd for  $\text{C}_{17}\text{H}_{16}\text{Cl}_2\text{N}_2\text{O}_5\text{S}$  431.5090; found 431.5089; HPLC (Daicel Chiralcel OD-H, *i*-PrOH/Hexane = 30/70, 1.0 mL/min, 210 nm)  $t_1 = 17.2$  min (major),  $t_2 = 23.0$  min (minor).

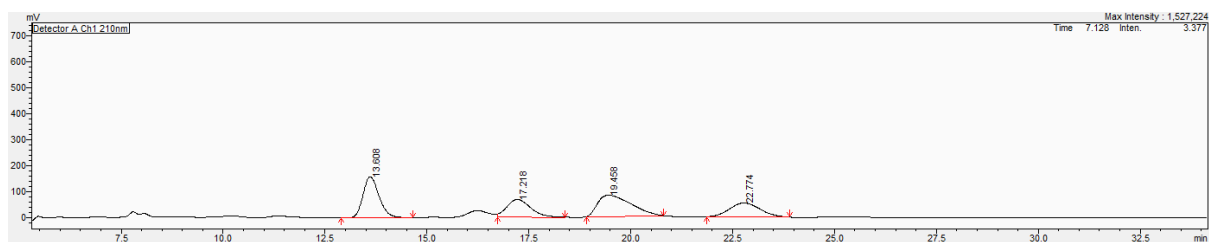

| Peak# | Ret. Time | Area     | Height | Mark | Conc.   |
|-------|-----------|----------|--------|------|---------|
| 1     | 13.608    | 4289135  | 157292 | M    | 29.703  |
| 2     | 17.218    | 2763472  | 67768  | M    | 19.138  |
| 3     | 19.458    | 4578086  | 81149  | M    | 31.704  |
| 4     | 22.774    | 2809361  | 53842  | M    | 19.455  |
| Total |           | 14440054 | 360051 |      | 100.000 |

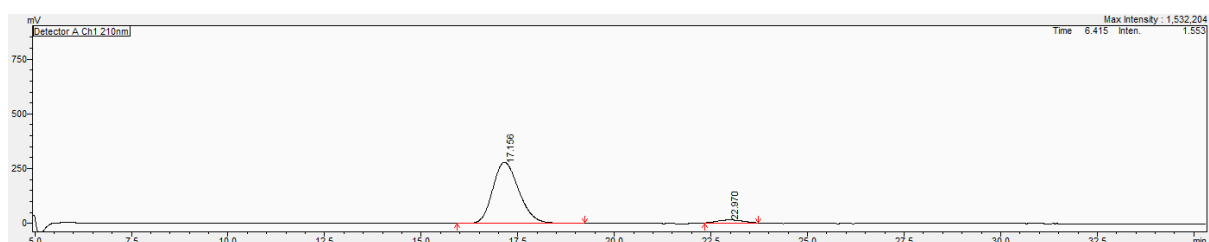

| Peak# | Ret. Time | Area     | Height | Mark | Conc.   |
|-------|-----------|----------|--------|------|---------|
| 1     | 17.156    | 13100560 | 278986 | M    | 95.491  |
| 2     | 22.970    | 618583   | 13522  | M    | 4.509   |
| Total |           | 13719144 | 292508 |      | 100.000 |

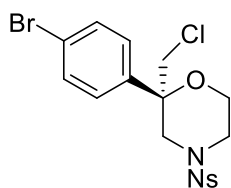

**2h**

45.5 mg, 96%, yellow solid; MP 197–198 °C;  $[\alpha]_D^{25} = +73.0$  (*c* 1.0, MeOH, 94% ee);  $^1\text{H}$  NMR ( $\text{CDCl}_3$ , 400 MHz):  $\delta$  8.46 (d, *J* = 12.0 Hz, 2H), 7.99 (d, *J* = 8.0 Hz, 2H), 7.60 (d, *J* = 8.0 Hz, 2H), 7.40 (d, *J* = 8.0 Hz, 2H), 4.15–3.65 (m, 5H), 3.36–2.74 (m, 3H);  $^{13}\text{C}$  NMR ( $\text{CDCl}_3$ , 100 MHz):  $\delta$  150.5, 141.0, 136.6, 132.1, 129.0, 128.9, 124.6, 122.9, 76.7, 61.0, 49.8, 49.2, 45.5; HRMS (TOF) *m/z*:  $[\text{M} + \text{H}]^+$  Calcd for  $\text{C}_{17}\text{H}_{16}\text{ClBrN}_2\text{O}_5\text{S}$  475.1367; found 475.1368; HPLC (Daicel Chiralcel IC, *i*-PrOH/Hexane = 30/70, 1.0 mL/min, 254 nm)  $t_1 = 31.7$  min (major),  $t_2 = 36.9$  min (minor).

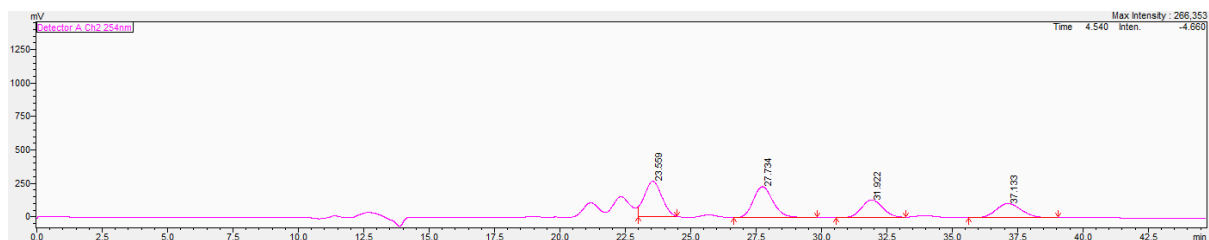



| Peak# | Ret. Time | Area     | Height | Mark | Conc.   |
|-------|-----------|----------|--------|------|---------|
| 1     | 23.559    | 12378526 | 266120 | M    | 31.888  |
| 2     | 27.734    | 12103191 | 231191 |      | 31.178  |
| 3     | 31.922    | 7226324  | 131519 |      | 18.615  |
| 4     | 37.133    | 7111194  | 105816 |      | 18.319  |
| Total |           | 38819235 | 734646 |      | 100.000 |

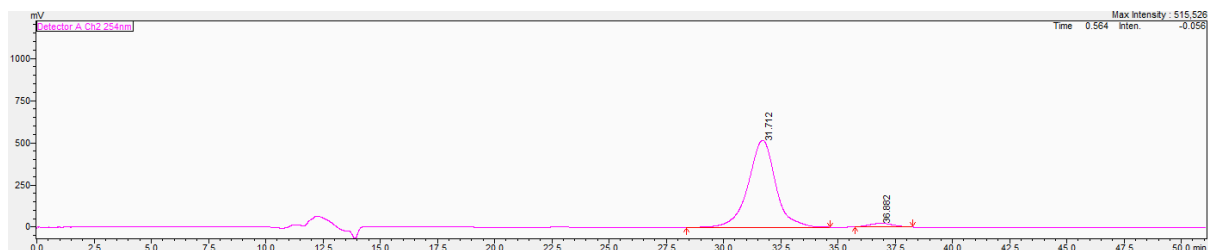

| Peak# | Ret. Time | Area     | Height | Mark | Conc.   |
|-------|-----------|----------|--------|------|---------|
| 1     | 31.712    | 42575767 | 515916 | M    | 96.926  |
| 2     | 36.882    | 1350465  | 20135  | M    | 3.074   |
| Total |           | 43926232 | 536050 |      | 100.000 |

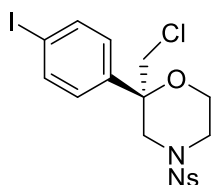

2i

48.5 mg, 93%, yellow solid; MP 217–218 °C;  $[\alpha]_D^{25} = +64.9$  (*c* 1.0, MeOH, 90% ee);  $^1\text{H}$  NMR ( $\text{CDCl}_3$ , 400 MHz):  $\delta$  8.45 (d, *J* = 8.0 Hz, 2H), 7.99 (d, *J* = 8.0 Hz, 2H), 7.80 (d, *J* = 8.0 Hz, 2H), 7.27 (d, *J* = 8.0 Hz, 2H), 4.14–3.64 (m, 5H), 3.35–2.74 (m, 3H);  $^{13}\text{C}$  NMR ( $\text{CDCl}_3$ , 100 MHz):  $\delta$  150.5, 141.0, 138.1, 137.3, 129.1, 129.0, 124.6, 94.7, 76.8, 61.0, 49.8, 49.1, 45.4; HRMS (TOF) *m/z*:  $[\text{M} + \text{H}]^+$  Calcd for  $\text{C}_{17}\text{H}_{16}\text{ClIN}_2\text{O}_5\text{S}$  523.7125; found 523.7126; HPLC (Daicel Chiralcel IC, *i*-PrOH/Hexane = 30/70, 1.0 mL/min, 210 nm)  $t_1 = 12.9$  min (minor),  $t_2 = 16.8$  min (major).

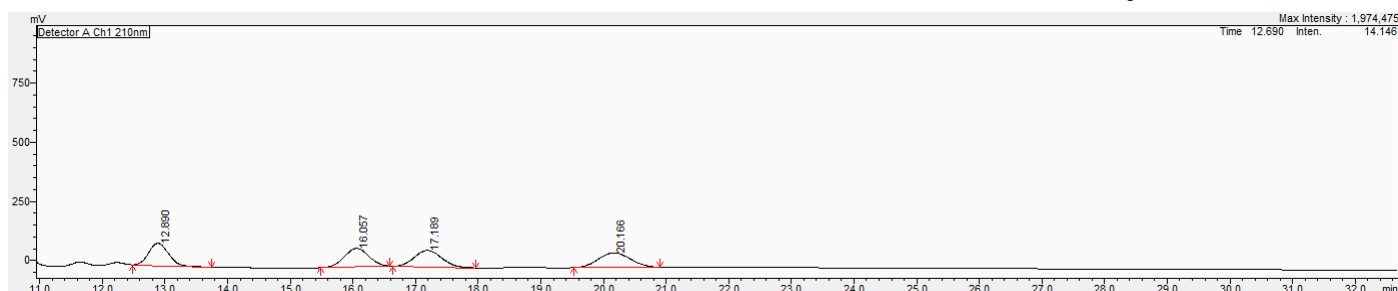

| Peak# | Ret. Time | Area    | Height | Mark | Conc.   |
|-------|-----------|---------|--------|------|---------|
| 1     | 12.890    | 2064815 | 94111  |      | 24.314  |
| 2     | 16.057    | 2116939 | 77879  | M    | 24.928  |
| 3     | 17.189    | 2089055 | 69261  |      | 24.600  |
| 4     | 20.166    | 2221368 | 61995  | M    | 26.158  |
| Total |           | 8492177 | 303246 |      | 100.000 |

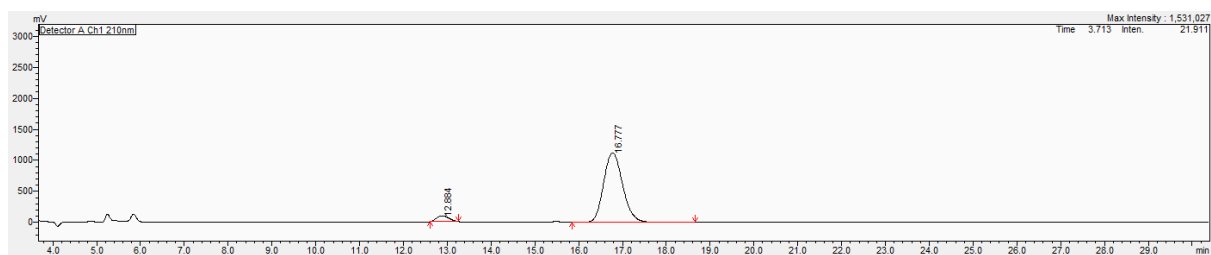

| Peak# | Ret. Time | Area     | Height  | Mark | Conc.   |
|-------|-----------|----------|---------|------|---------|
| 1     | 12.884    | 1882057  | 95670   | M    | 5.283   |
| 2     | 16.777    | 33745753 | 1121907 | M    | 94.717  |
| Total |           | 35627810 | 1217577 |      | 100.000 |

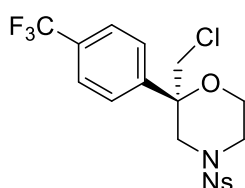

### 2j

39.0 mg, 84%, yellow solid; MP 195–196 °C;  $[\alpha]_D^{25} = +49.3$  (*c* 1.0, MeOH, 77% ee);  $^1\text{H}$  NMR ( $\text{CDCl}_3$ , 400 MHz):  $\delta$  8.46 (d,  $J = 8.0$  Hz, 2H), 8.00 (d,  $J = 8.0$  Hz, 2H), 7.74 (d,  $J = 12.0$  Hz, 2H), 7.67 (d,  $J = 8.0$  Hz, 2H), 4.19–3.65 (m, 5H), 3.36–2.77 (m, 3H);  $^{13}\text{C}$  NMR ( $\text{CDCl}_3$ , 100 MHz):  $\delta$  150.6, 141.7, 140.9, 131.0, 130.6, 129.0, 127.6, 125.9 (q,  $J = 4.0$  Hz), 124.7, 76.7, 61.0, 49.6, 49.4, 45.4; HRMS (TOF)  $m/z$ :  $[\text{M} + \text{H}]^+$  Calcd for  $\text{C}_{18}\text{H}_{16}\text{ClF}_3\text{N}_2\text{O}_5\text{S}$  465.8291; found 465.8292; HPLC (Daicel Chiralcel IC, *i*-PrOH/Hexane = 20/80, 1.0 mL/min, 210nm)  $t_1 = 13.3$  min (major),  $t_2 = 17.8$  min (minor).

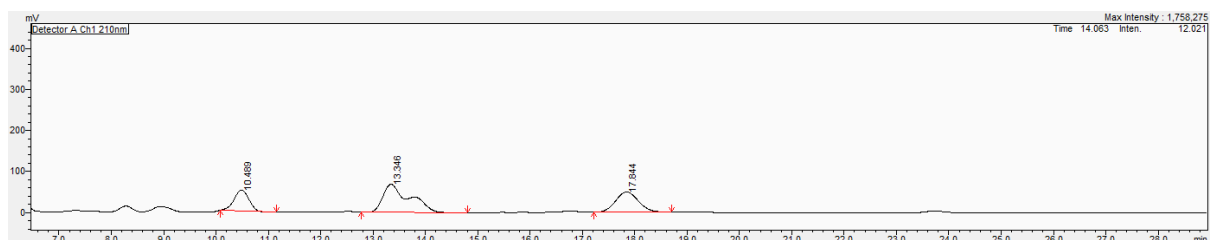

| Peak# | Ret. Time | Area    | Height | Mark | Conc.   |
|-------|-----------|---------|--------|------|---------|
| 1     | 10.489    | 995506  | 50758  | M    | 20.165  |
| 2     | 13.346    | 2413008 | 68459  | M    | 48.878  |
| 3     | 17.844    | 1528302 | 49561  | M    | 30.957  |
| Total |           | 4936816 | 168778 |      | 100.000 |

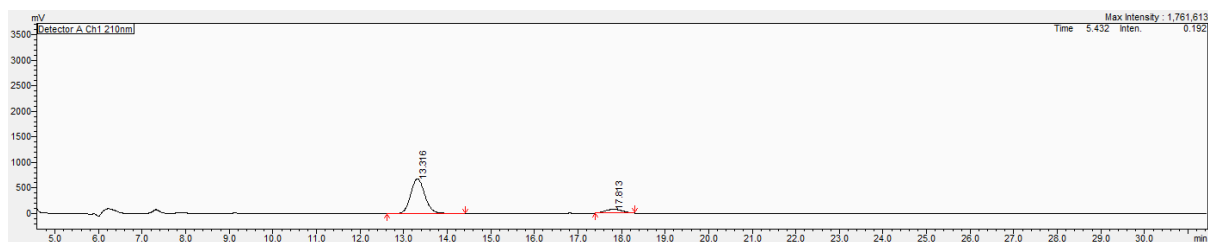

| Peak# | Ret. Time | Area     | Height | Mark | Conc.   |
|-------|-----------|----------|--------|------|---------|
| 1     | 13.316    | 15314397 | 679367 | M    | 88.284  |
| 2     | 17.813    | 2032304  | 74605  | M    | 11.716  |
| Total |           | 17346701 | 753971 |      | 100.000 |

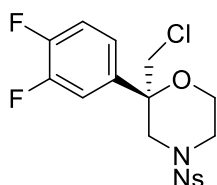

### 2k

42.3 mg, 98%, yellow solid; MP 179–180 °C;  $[\alpha]_D^{25} = +68.9$  ( $c$  1.0, MeOH, 90% ee);  $^1\text{H}$  NMR ( $\text{CDCl}_3$ , 400 MHz):  $\delta$  8.47 (d,  $J = 12.0$  Hz, 2H), 8.00 (d,  $J = 8.0$  Hz, 2H), 7.40–7.24 (m, 3H), 4.10–3.61 (m, 5H), 3.37–2.93 (m, 3H);  $^{13}\text{C}$  NMR ( $\text{CDCl}_3$ , 100 MHz):  $\delta$  151.8, 150.6, 149.5 (d,  $J = 12.0$  Hz), 141.1, 134.8, 128.9, 124.6, 123.5, 117.8 (d,  $J = 18.0$  Hz), 116.1 (d,  $J = 19.0$  Hz), 76.3, 61.0, 49.6, 49.4, 45.5; HRMS (TOF)  $m/z$ :  $[\text{M} + \text{H}]^+$  Calcd for  $\text{C}_{17}\text{H}_{15}\text{ClF}_2\text{N}_2\text{O}_5\text{S}$  433.7523; found 433.7524; HPLC (Daicel Chiralcel AD-H, *i*-PrOH/Hexane = 20/80, 1.0 mL/min, 210 nm)  $t_1 = 14.7$  min (minor),  $t_2 = 16.3$  min (major).

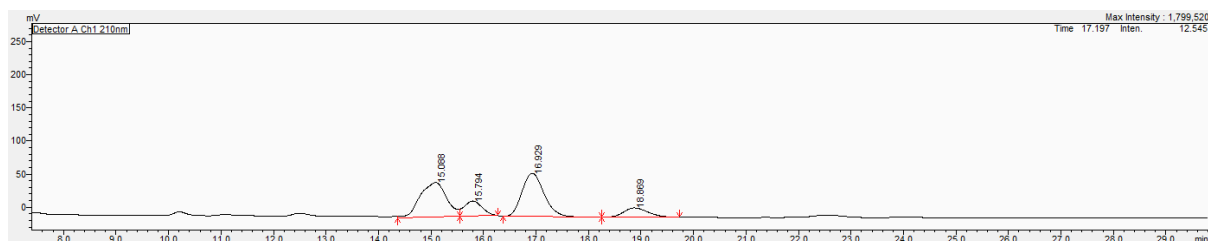

| Peak# | Ret. Time | Area    | Height | Mark | Conc.   |
|-------|-----------|---------|--------|------|---------|
| 1     | 15.088    | 1848711 | 52268  | M    | 39.219  |
| 2     | 15.794    | 526300  | 22505  | M    | 11.165  |
| 3     | 16.929    | 1882550 | 65088  | S    | 39.937  |
| 4     | 18.869    | 456200  | 14075  |      | 9.678   |
| Total |           | 4713761 | 153937 |      | 100.000 |

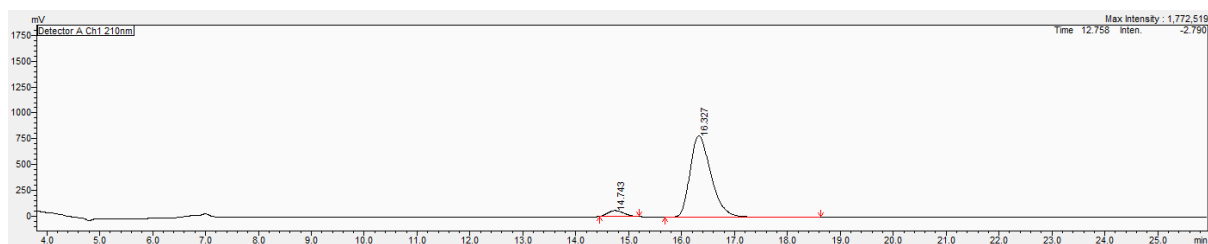

| Peak# | Ret. Time | Area     | Height | Mark | Conc.   |
|-------|-----------|----------|--------|------|---------|
| 1     | 14.743    | 1187930  | 56393  | M    | 5.246   |
| 2     | 16.327    | 21457002 | 782937 | M    | 94.754  |
| Total |           | 22644933 | 839329 |      | 100.000 |

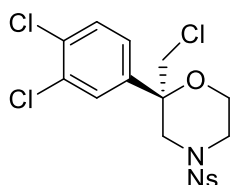

## 2l

44.6 mg, 96%, yellow solid; MP 184–185 °C;  $[\alpha]_D^{25} = +44.4$  (*c* 1.0, MeOH, 94% ee);  $^1\text{H}$  NMR ( $\text{CDCl}_3$ , 400 MHz):  $\delta$  8.46 (d, *J* = 8.0 Hz, 2H), 8.00 (d, *J* = 8.0 Hz, 2H), 7.60–7.35 (m, 3H), 4.07–3.62 (m, 5H), 3.35–2.80 (m, 3H);  $^{13}\text{C}$  NMR ( $\text{CDCl}_3$ , 100 MHz):  $\delta$  150.6, 141.0, 138.0, 133.3, 133.0, 130.9, 129.2, 129.0, 126.6, 124.7, 76.4, 61.1, 49.4, 45.4, 22.5; HRMS (TOF) *m/z*:  $[\text{M}+\text{H}]^+$  Calcd for  $\text{C}_{17}\text{H}_{15}\text{Cl}_2\text{N}_2\text{O}_5\text{S}$  465.5796; found 465.5797; HPLC (Daicel Chiralcel IC, *i*-PrOH/Hexane = 35/65, 1.0 mL/min, 210 nm)  $t_1 = 11.5$  min (major),  $t_2 = 14.9$  min (minor).

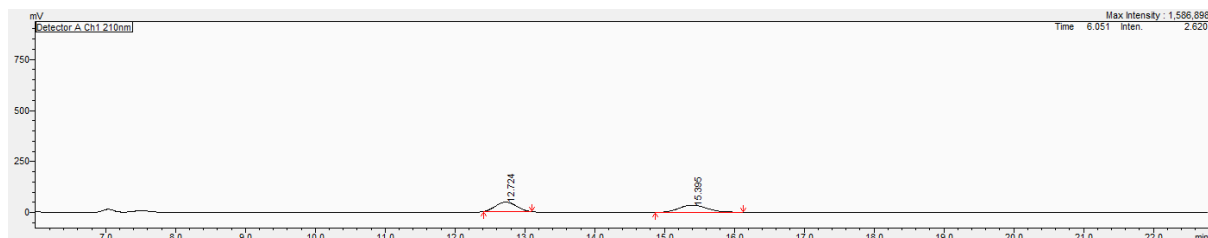

| Peak# | Ret. Time | Area    | Height | Mark | Conc.   |
|-------|-----------|---------|--------|------|---------|
| 1     | 12.724    | 941783  | 46235  | M    | 49.342  |
| 2     | 15.395    | 966905  | 35195  | M    | 50.658  |
| Total |           | 1908688 | 81430  |      | 100.000 |

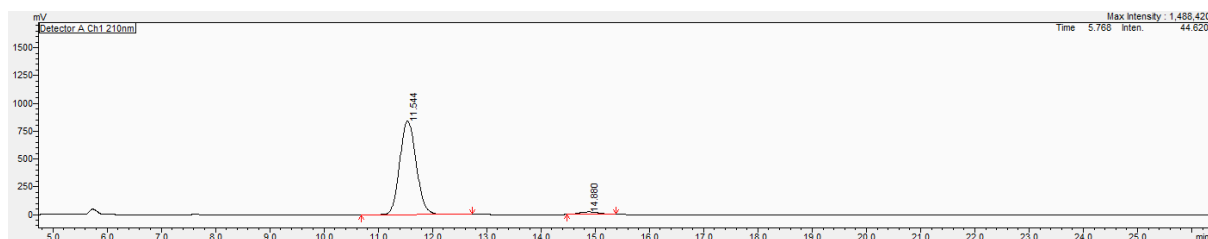

| Peak# | Ret. Time | Area     | Height | Mark | Conc.   |
|-------|-----------|----------|--------|------|---------|
| 1     | 11.544    | 17747780 | 839929 | M    | 96.803  |
| 2     | 14.880    | 586101   | 22744  | M    | 3.197   |
| Total |           | 18333882 | 862673 |      | 100.000 |

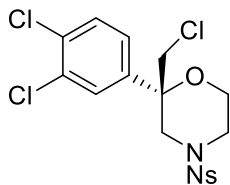

**ent-2l**

43.6 mg, 94%,  $[\alpha]_D^{25} = -29.7$  (*c* 1.0, MeOH, 85% ee); HPLC (Daicel Chiralcel IC, *i*-PrOH/Hexane = 35/65, 1.0 mL/min, 210 nm)  $t_1 = 11.3$  min (minor),  $t_2 = 14.5$  min (major).

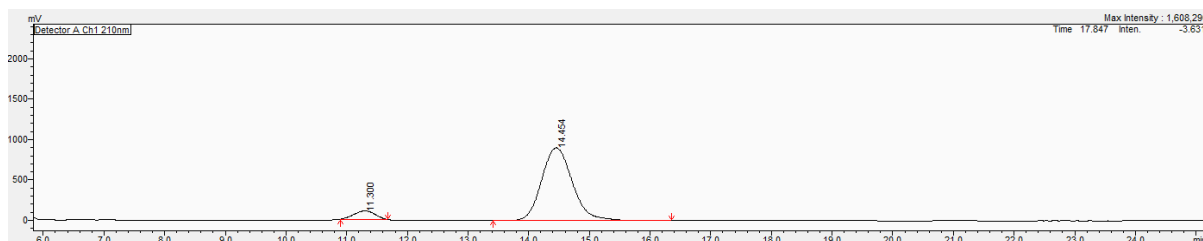

| Peak# | Ret. Time | Area     | Height  | Mark | Conc.   |
|-------|-----------|----------|---------|------|---------|
| 1     | 11.300    | 2502817  | 103545  | M    | 7.297   |
| 2     | 14.454    | 31797959 | 900967  | M    | 92.703  |
| Total |           | 34300776 | 1004512 |      | 100.000 |

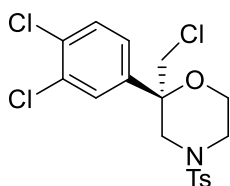

**2m**

41.6 mg, 96%, yellow solid; MP 171–172 °C;  $[\alpha]_D^{25} = +32.1$  (*c* 1.0, MeOH, 89% ee);  $^1\text{H}$  NMR ( $\text{CDCl}_3$ , 400 MHz):  $\delta$  7.68-7.34 (m, 7H), 3.92-3.61 (m, 5H), 3.24-2.76 (m, 3H), 2.47 (s, 3H);  $^{13}\text{C}$  NMR ( $\text{CDCl}_3$ , 100 MHz):  $\delta$  144.4, 138.6, 133.1, 132.6, 131.9, 130.7, 130.0, 129.2, 127.8, 126.7, 76.3, 61.3, 49.7, 49.4, 45.5, 21.6; HRMS (TOF) *m/z*:  $[\text{M}+\text{H}]^+$  Calcd for  $\text{C}_{18}\text{H}_{18}\text{Cl}_3\text{NO}_3\text{S}$  434.7022; found 434.7023; HPLC (Daicel Chiralcel AD-H, *i*-PrOH/Hexane = 20/80, 1.0 mL/min, 210 nm)  $t_1 = 8.5$  min (minor),  $t_2 = 10.4$  min (major).

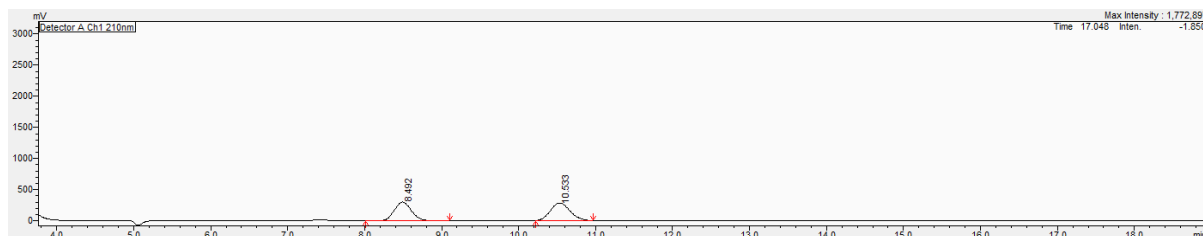

| Peak# | Ret. Time | Area    | Height | Mark | Conc.   |
|-------|-----------|---------|--------|------|---------|
| 1     | 8.492     | 4640844 | 301855 | M    | 47.988  |
| 2     | 10.533    | 5030030 | 282453 | M    | 52.012  |
| Total |           | 9670873 | 584308 |      | 100.000 |

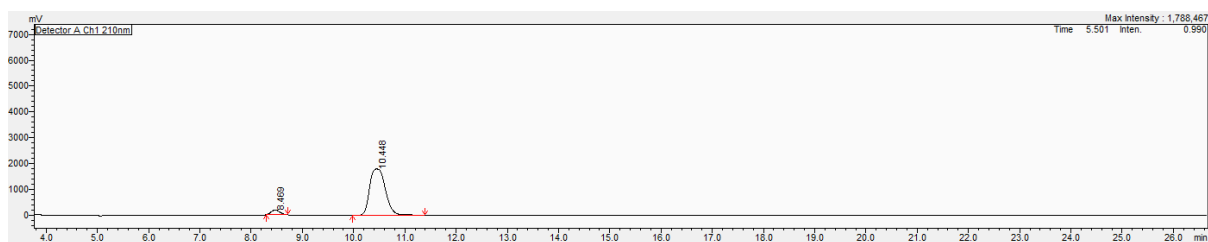

| Peak# | Ret. Time | Area     | Height  | Mark | Conc.   |
|-------|-----------|----------|---------|------|---------|
| 1     | 8.469     | 2213348  | 185482  | M    | 5.447   |
| 2     | 10.448    | 38421710 | 1786880 | M    | 94.553  |
| Total |           | 40635059 | 1972362 |      | 100.000 |

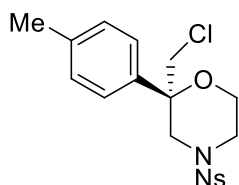

### 2n

40.2 mg, 98%, yellow solid; MP 200–201 °C;  $[\alpha]_D^{25} = +61.4$  ( $c$  1.0, MeOH, 84% ee);  $^1\text{H}$  NMR ( $\text{CDCl}_3$ , 400 MHz):  $\delta$  8.45 (d,  $J = 8.0$  Hz, 2H), 7.99 (d,  $J = 8.0$  Hz, 2H), 7.40-7.25 (m, 4H), 4.16 (d,  $J = 12.0$  Hz, 1H), 3.83-3.63 (m, 4H), 3.35-3.31 (m, 1H), 3.00 (d,  $J = 12.0$  Hz, 1H), 2.79-2.74 (m, 1H), 2.39 (s, 3H);  $^{13}\text{C}$  NMR ( $\text{CDCl}_3$ , 100 MHz):  $\delta$  150.5, 141.3, 138.5, 134.5, 129.7, 129.0, 126.9, 124.5, 76.7, 60.8, 50.3, 49.1, 45.4, 21.9; HRMS (TOF)  $m/z$ :  $[\text{M}+\text{H}]^+$  Calcd for  $\text{C}_{18}\text{H}_{19}\text{ClN}_2\text{O}_5\text{S}$  411.6972; found 411.6973; HPLC (Daicel Chiralcel AD-H,  $i$ -PrOH/Hexane = 35/65, 1.0 mL/min, 210 nm)  $t_1 = 10.0$  min (minor),  $t_2 = 12.1$  min (major).

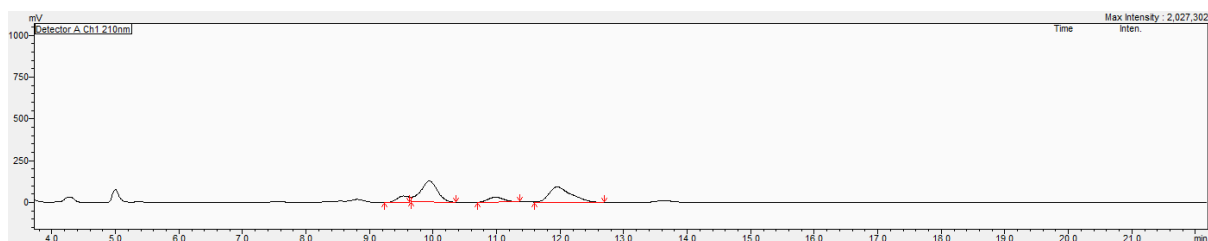

| Peak# | Ret. Time | Area    | Height | Mark | Conc.   |
|-------|-----------|---------|--------|------|---------|
| 1     | 9.535     | 492893  | 37798  | M    | 8.994   |
| 2     | 9.941     | 2285662 | 125523 | M    | 41.708  |
| 3     | 10.982    | 504086  | 29453  | M    | 9.198   |
| 4     | 11.955    | 2197474 | 91274  |      | 40.099  |
| Total |           | 5480114 | 284047 |      | 100.000 |

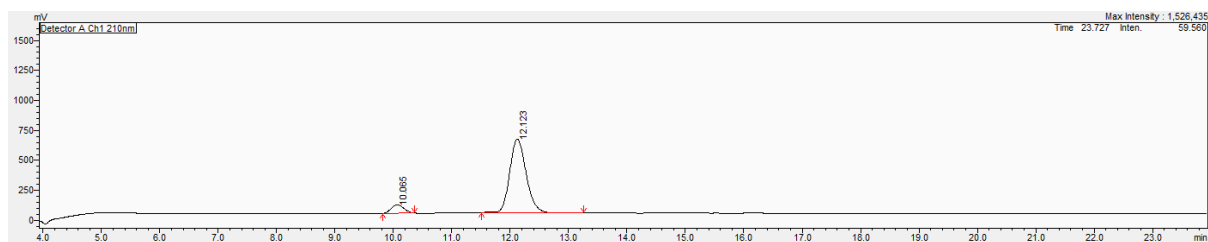

| Peak# | Ret. Time | Area     | Height | Mark | Conc.   |
|-------|-----------|----------|--------|------|---------|
| 1     | 10.065    | 1042541  | 70660  | M    | 8.028   |
| 2     | 12.123    | 11943692 | 614042 | M    | 91.972  |
| Total |           | 12986233 | 684701 |      | 100.000 |

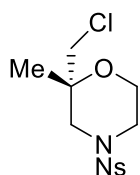

## 20

30.1 mg, 90%, yellow solid; MP 146–147 °C;  $[\alpha]_D^{25} = +2.8$  (c 1.0, MeOH, 26% ee);  $^1\text{H NMR}$  ( $\text{CDCl}_3$ , 400 MHz):  $\delta$  8.45 (d,  $J = 12.0$  Hz, 2H), 7.98 (d,  $J = 12.0$  Hz, 2H), 3.91–3.55 (m, 4H), 3.12–2.90 (m, 4H), 1.38 (s, 3H);  $^{13}\text{C NMR}$  ( $\text{CDCl}_3$ , 100 MHz):  $\delta$  152.2, 141.6, 128.9, 124.5, 72.7, 60.4, 51.4, 47.4, 45.3, 20.8; HRMS (TOF)  $m/z$ :  $[\text{M} + \text{H}]^+$  Calcd for  $\text{C}_{12}\text{H}_{15}\text{ClN}_2\text{O}_5\text{S}$  335.6819; found 335.6820; HPLC (Daicel Chiralcel AD-H, *i*-PrOH/Hexane = 35/65, 1.0 mL/min, 210 nm)  $t_1 = 10.0$  min (minor),  $t_2 = 13.1$  min (major).

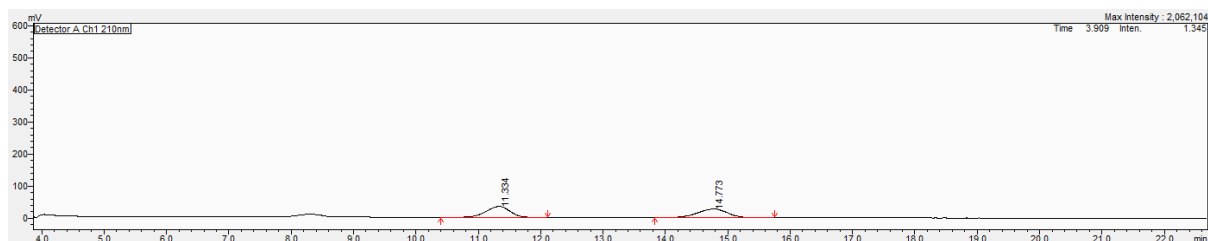

| Peak# | Ret. Time | Area    | Height | Mark | Conc.   |
|-------|-----------|---------|--------|------|---------|
| 1     | 11.334    | 960642  | 34590  |      | 50.604  |
| 2     | 14.773    | 937724  | 27278  | V    | 49.396  |
| Total |           | 1898366 | 61867  |      | 100.000 |

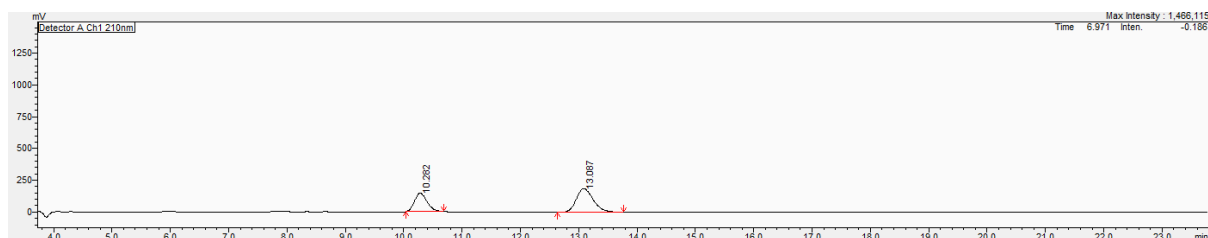

| Peak# | Ret. Time | Area    | Height | Mark | Conc.   |
|-------|-----------|---------|--------|------|---------|
| 1     | 10.282    | 2157239 | 144492 | M    | 36.855  |
| 2     | 13.087    | 3696137 | 184966 | M    | 63.145  |
| Total |           | 5853376 | 329458 |      | 100.000 |

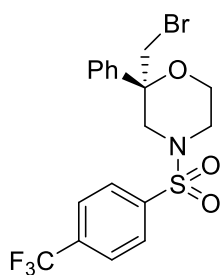

### 2d-Br

44.9 mg, 97%, white solid; MP 197–198 °C;  $[\alpha]_D^{25} = +9.4$  ( $c$  1.0, MeOH, 54% ee);  $^1\text{H NMR}$  ( $\text{CDCl}_3$ , 400 MHz):  $\delta$  7.94–7.86 (m, 4H), 7.52–7.37 (m, 5H), 4.07 (d,  $J = 12.0$  Hz, 1H), 3.85–3.57 (m, 4H), 3.25–2.81 (m, 3H);  $^{13}\text{C NMR}$  ( $\text{CDCl}_3$ , 100 MHz):  $\delta$  138.9, 137.9, 135.1, 134.8, 128.9, 128.5, 128.3, 126.8, 126.5 (q,  $J = 30.0$  Hz), 128.9, 128.5, 128.3, 127.0, 126.6, 126.5, 76.8, 60.9, 50.1, 49.2, 45.4; HRMS (TOF)  $m/z$ :  $[\text{M} + \text{H}]^+$  Calcd for  $\text{C}_{18}\text{H}_{17}\text{BrF}_3\text{NO}_3\text{S}$  464.5912; found 464.5913; HPLC (Daicel Chiralcel AD-H,  $i$ -PrOH/Hexane = 10/90, 1.0 mL/min, 210 nm)  $t_1 = 10.1$  min (minor),  $t_2 = 14.6$  min (major).

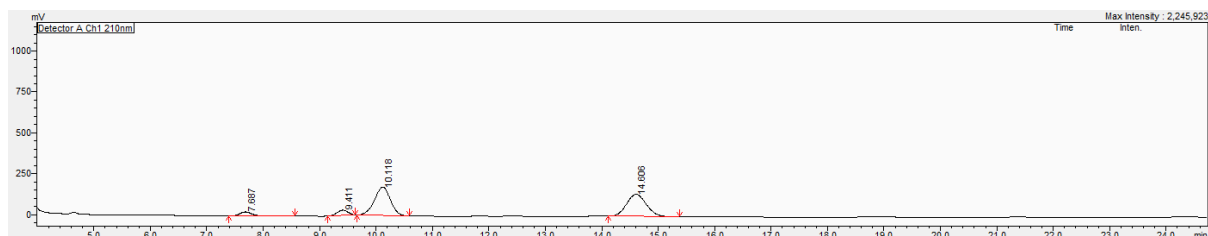

| Peak# | Ret. Time | Area    | Height | Mark | Conc.   |
|-------|-----------|---------|--------|------|---------|
| 1     | 7.687     | 368595  | 24349  |      | 4.885   |
| 2     | 9.411     | 442340  | 32230  | M    | 5.863   |
| 3     | 10.118    | 3426041 | 173555 |      | 45.408  |
| 4     | 14.606    | 3307995 | 135140 |      | 43.844  |
| Total |           | 7544971 | 365275 |      | 100.000 |

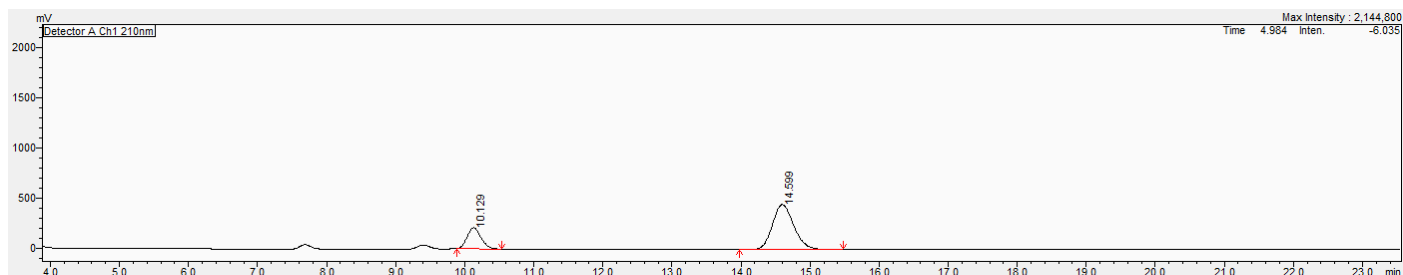

| Peak# | Ret. Time | Area     | Height | Mark | Conc.   |
|-------|-----------|----------|--------|------|---------|
| 1     | 10.129    | 2898955  | 208782 | M    | 23.238  |
| 2     | 14.599    | 9575923  | 448602 | M    | 76.762  |
| Total |           | 12474878 | 657384 |      | 100.000 |



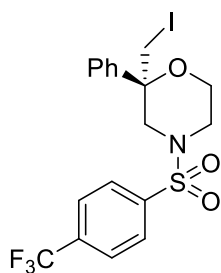

### 2d-I

48.5 mg, 95%, yellow solid; MP 225–226 °C;  $[\alpha]_D^{25} = 0$  (*c* 1.0, MeOH, 2% ee);  $^1\text{H NMR}$  ( $\text{CDCl}_3$ , 400 MHz):  $\delta$  7.93–7.85 (m, 4H), 7.49–7.35 (m, 5H), 3.87–3.75 (m, 3H), 3.65 (d,  $J = 8.0$  Hz, 1H), 3.48 (d,  $J = 8.0$  Hz, 1H), 3.21–2.92 (m, 3H);  $^{13}\text{C NMR}$  ( $\text{CDCl}_3$ , 100 MHz):  $\delta$  138.9, 138.6, 135.1, 134.8, 128.8, 128.3, 126.6 (q,  $J = 30.0$  Hz), 126.4, 75.0, 61.1, 51.4, 45.3, 13.8; HRMS (TOF)  $m/z$ :  $[\text{M} + \text{H}]^+$  Calcd for  $\text{C}_{18}\text{H}_{17}\text{F}_3\text{NO}_3\text{S}$  512.4077; found 512.4076; HPLC (Daicel Chiralcel AD-H, *i*-PrOH/Hexane = 10/90, 1.0 mL/min, 210 nm)  $t_1 = 10.1$  min (minor),  $t_2 = 14.6$  min (major).

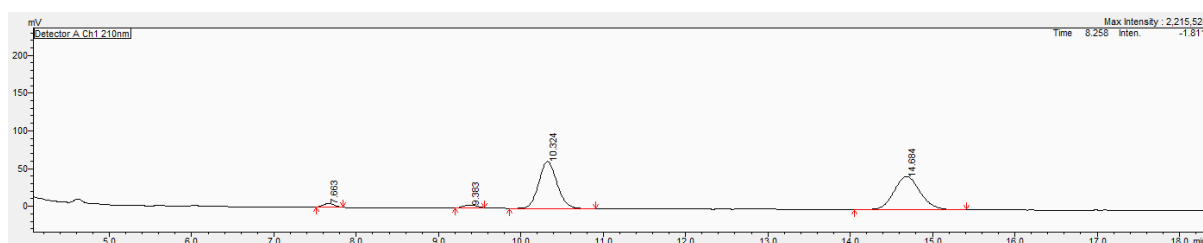

| Peak# | Ret. Time | Area    | Height | Mark | Conc.   |
|-------|-----------|---------|--------|------|---------|
| 1     | 7.663     | 45690   | 4633   | M    | 2.257   |
| 2     | 9.383     | 43192   | 3817   | M    | 2.133   |
| 3     | 10.324    | 969095  | 62371  |      | 47.863  |
| 4     | 14.684    | 966729  | 43899  | M    | 47.747  |
| Total |           | 2024707 | 114720 |      | 100.000 |

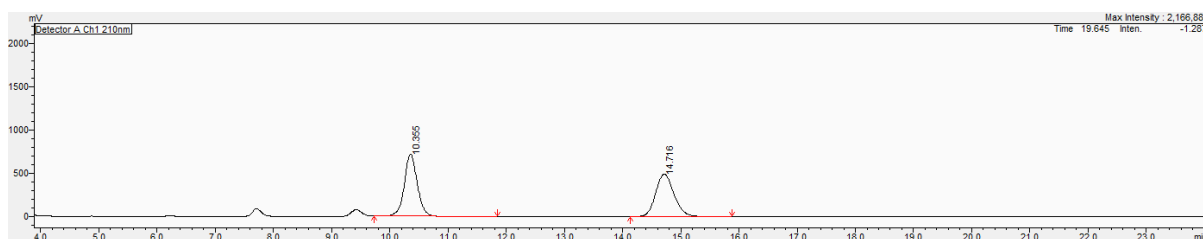

| Peak# | Ret. Time | Area     | Height  | Mark | Conc.   |
|-------|-----------|----------|---------|------|---------|
| 1     | 10.355    | 11049054 | 715308  | S    | 50.985  |
| 2     | 14.716    | 10622053 | 488247  |      | 49.015  |
| Total |           | 21671106 | 1203556 |      | 100.000 |

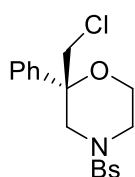

### ent-2r

33.0 mg, 94%, yellow solid; MP 165–166 °C;  $[\alpha]_D^{25} = -65.1$  ( $c$  1.0, MeOH, 73% ee);  $^1\text{H}$  NMR ( $\text{CDCl}_3$ , 400 MHz):  $\delta$  7.81-7.35 (m, 10H), 4.07 (d,  $J = 12.0$  Hz, 1H), 3.84-3.68 (m, 4H), 3.26-3.23 (m, 1H), 3.01 (d,  $J = 12.0$  Hz, 1H), 2.79-2.73 (m, 1H);  $^{13}\text{C}$  NMR ( $\text{CDCl}_3$ , 100 MHz):  $\delta$  138.0, 135.0, 133.3, 129.3, 128.8, 128.4, 127.8, 127.0, 76.7, 61.0, 50.1, 49.4, 45.5; HRMS (TOF)  $m/z$ :  $[\text{M} + \text{H}]^+$  Calcd for  $\text{C}_{17}\text{H}_{18}\text{ClN}_2\text{O}_3\text{S}$  352.9033; found 352.9034; HPLC (Daicel Chiralcel AD-H,  $i$ -PrOH/Hexane = 35/65, 1.0 mL/min, 210 nm)  $t_1 = 6.9$  min (major),  $t_2 = 9.2$  min (minor).

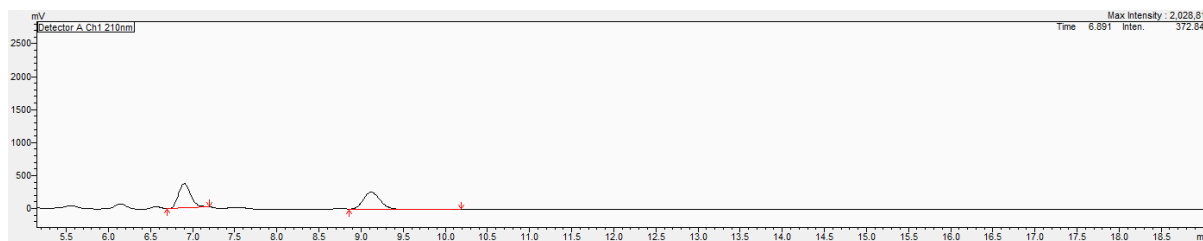

| Peak# | Ret. Time | Area    | Height | Mark | Conc.   |
|-------|-----------|---------|--------|------|---------|
| 1     | 6.901     | 3702749 | 366892 | M    | 49.957  |
| 2     | 9.119     | 3709183 | 262611 | V    | 50.043  |
| Total |           | 7411932 | 629503 |      | 100.000 |

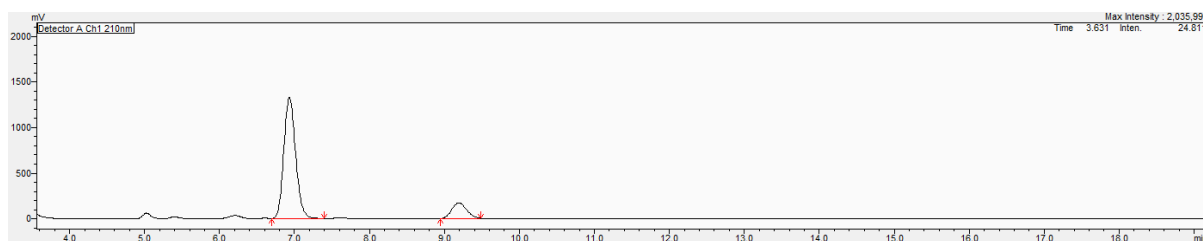

| Peak# | Ret. Time | Area     | Height  | Mark | Conc.   |
|-------|-----------|----------|---------|------|---------|
| 1     | 6.931     | 14731685 | 1332202 | V    | 86.359  |
| 2     | 9.191     | 2327023  | 171384  | M    | 13.641  |
| Total |           | 17058708 | 1503587 |      | 100.000 |

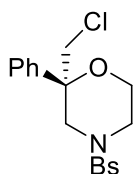

**2r**

33.3 mg, 95%,  $[\alpha]_D^{25} = +61.2$  ( $c$  1.0, MeOH, 73% ee); HPLC (Daicel Chiralcel AD-H,  $i$ -PrOH/Hexane = 35/65, 1.0 mL/min, 210 nm)  $t_1 = 6.9$  min (minor),  $t_2 = 9.1$  min (major).

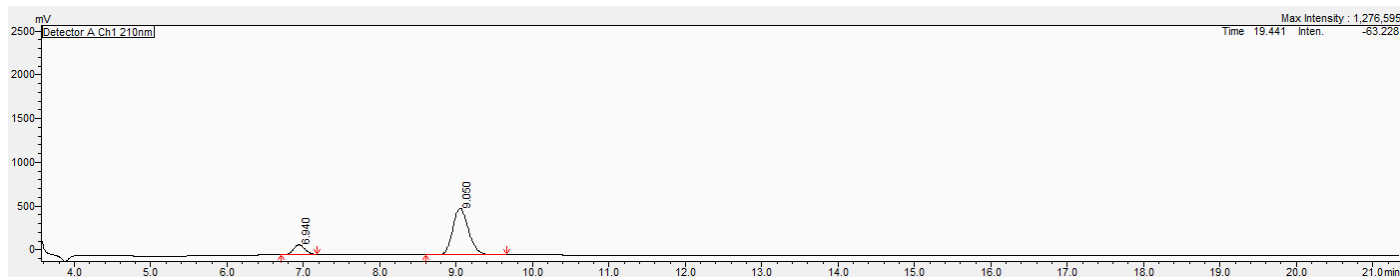

| Peak# | Ret. Time | Area    | Height | Mark | Conc.   |
|-------|-----------|---------|--------|------|---------|
| 1     | 6.940     | 1196097 | 112979 | M    | 13.504  |
| 2     | 9.050     | 7661372 | 533246 | M    | 86.496  |
| Total |           | 8857470 | 646225 |      | 100.000 |

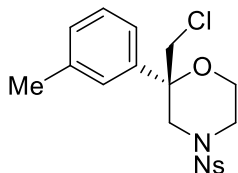

*ent-2s*

40.2 mg, 98%, yellow solid; MP 186–187 °C;  $[\alpha]_D^{25} = +65.3$  (*c* 1.0, MeOH, 86% ee);  $^1\text{H}$  NMR ( $\text{CDCl}_3$ , 400 MHz):  $\delta$  8.45 (d, *J* = 8.0 Hz, 2H), 7.99 (d, *J* = 8.0 Hz, 2H), 7.36-7.19 (m, 4H), 4.11 (d, *J* = 12.0 Hz, 1H), 3.80-3.75 (m, 4H), 3.32-3.30 (m, 1H), 3.05 (d, *J* = 12.0 Hz, 1H), 2.84-2.78 (m, 1H), 2.41 (s, 3H);  $^{13}\text{C}$  NMR ( $\text{CDCl}_3$ , 100 MHz):  $\delta$  150.5, 141.2, 138.6, 137.5, 129.4, 129.0, 128.8, 127.5, 127.6, 124.0, 76.7, 60.9, 50.0, 49.2, 45.4, 21.7; HRMS (TOF) *m/z*:  $[\text{M} + \text{H}]^+$  Calcd for  $\text{C}_{18}\text{H}_{19}\text{ClN}_2\text{O}_5\text{S}$  411.6972; found 411.6971; HPLC (Daicel Chiralcel OD-H, *i*-PrOH/Hexane = 35/65, 1.0 mL/min, 210 nm)  $t_1 = 14.2$  min (minor),  $t_2 = 15.8$  min (major).

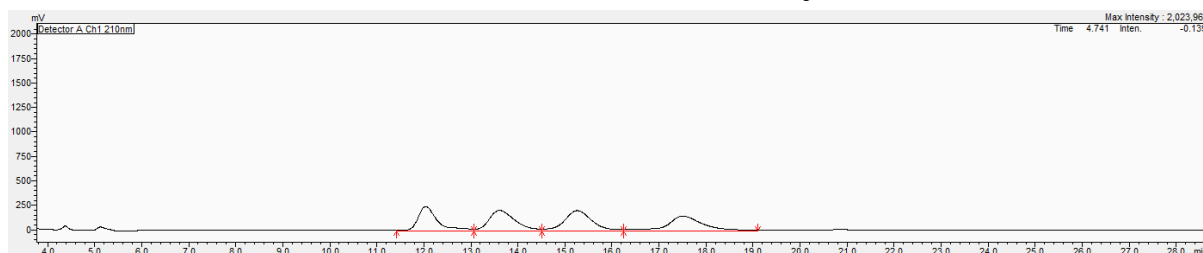

| Peak# | Ret. Time | Area     | Height | Mark | Conc.   |
|-------|-----------|----------|--------|------|---------|
| 1     | 12.040    | 7546957  | 251348 | V    | 23.295  |
| 2     | 13.609    | 8249933  | 210207 | V    | 25.465  |
| 3     | 15.261    | 8551472  | 207424 | V    | 26.396  |
| 4     | 17.507    | 8048486  | 150348 | V    | 24.843  |
| Total |           | 32396847 | 819327 |      | 100.000 |

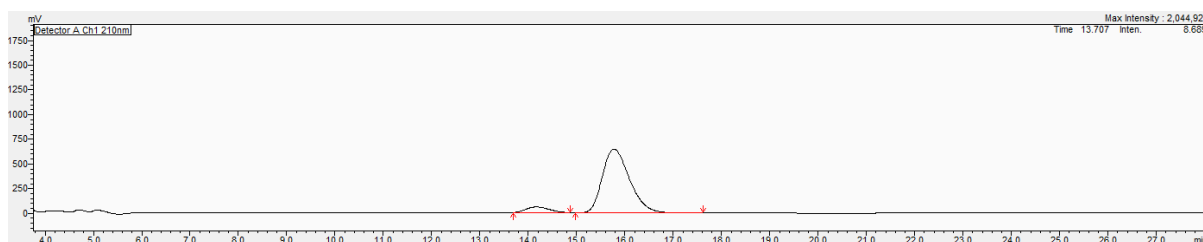

| Peak# | Ret. Time | Area     | Height | Mark | Conc.   |
|-------|-----------|----------|--------|------|---------|
| 1     | 14.167    | 1954742  | 57715  | M    | 7.189   |
| 2     | 15.774    | 25236485 | 647060 | M    | 92.811  |
| Total |           | 27191226 | 704775 |      | 100.000 |

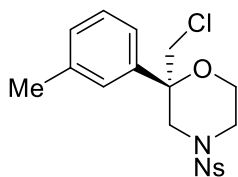

**2s**

38.5 mg, 94%,  $[\alpha]_D^{25} = -59.6$  (*c* 1.0, MeOH, 79% ee); HPLC (Daicel Chiralcel OD-H, *i*-PrOH/Hexane = 35/65, 1.0 mL/min, 210 nm)  $t_1 = 13.4$  min (major),  $t_2 = 15.0$  min (minor).

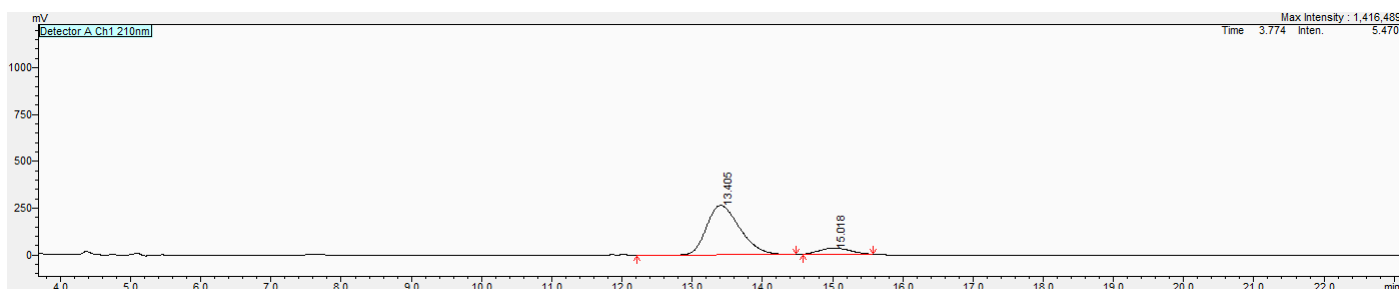

| Peak# | Ret. Time | Area    | Height | Mark | Conc.   |
|-------|-----------|---------|--------|------|---------|
| 1     | 13.405    | 8592296 | 262582 | M    | 89.615  |
| 2     | 15.018    | 995734  | 32939  | M    | 10.385  |
| Total |           | 9588030 | 295521 |      | 100.000 |

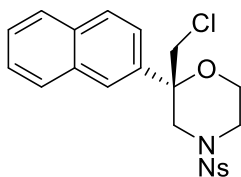

**ent-2t**

41.5 mg, 93%, yellow solid; MP 198–199 °C;  $[\alpha]_D^{25} = -55.8$  (*c* 1.0, MeOH, 80% ee);  $^1\text{H}$  NMR ( $\text{CDCl}_3$ , 400 MHz):  $\delta$  8.42–7.54 (m, 11H), 4.32–3.75 (m, 5H), 3.36 (d,  $J = 8.0$  Hz, 1H), 3.12 (d,  $J = 16.0$  Hz, 1H), 2.86–2.81 (m, 1H);  $^{13}\text{C}$  NMR ( $\text{CDCl}_3$ , 100 MHz):  $\delta$  150.5, 141.4, 134.8, 133.2, 133.1, 128.9, 128.5, 127.6, 127.4, 126.8, 126.5, 124.5, 123.7, 77.0, 61.1, 50.0, 49.3, 45.4; HRMS (TOF)  $m/z$ :  $[\text{M} + \text{H}]^+$  Calcd for  $\text{C}_{21}\text{H}_{19}\text{ClN}_2\text{O}_5\text{S}$  447.8358; found 447.8357; HPLC (Daicel Chiralcel OD-H, *i*-PrOH/Hexane = 35/65, 1.0 mL/min, 210 nm)  $t_1 = 30.1$  min (minor),  $t_2 = 34.4$  min (major).

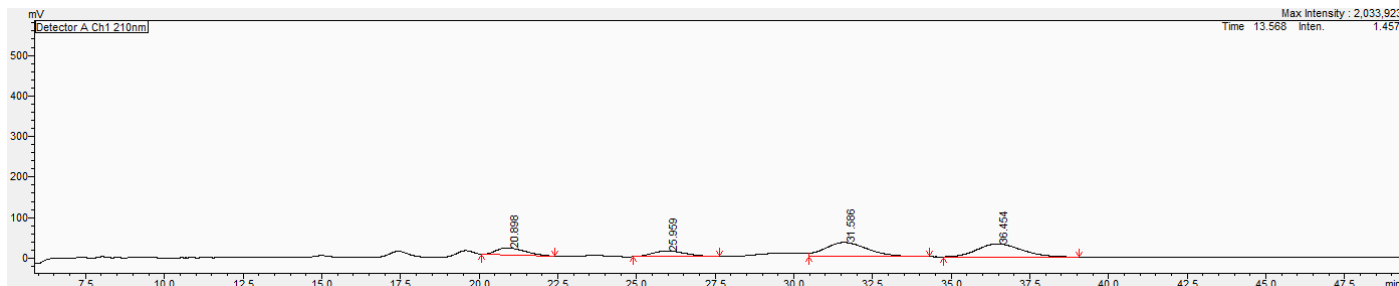

| Peak# | Ret. Time | Area    | Height | Mark | Conc.   |
|-------|-----------|---------|--------|------|---------|
| 1     | 20.898    | 1124285 | 17507  | M    | 13.327  |
| 2     | 25.959    | 1033088 | 14105  | M    | 12.246  |
| 3     | 31.586    | 3108271 | 33861  | M    | 36.846  |
| 4     | 36.454    | 3170256 | 32240  | V    | 37.581  |
| Total |           | 8435900 | 97714  |      | 100.000 |

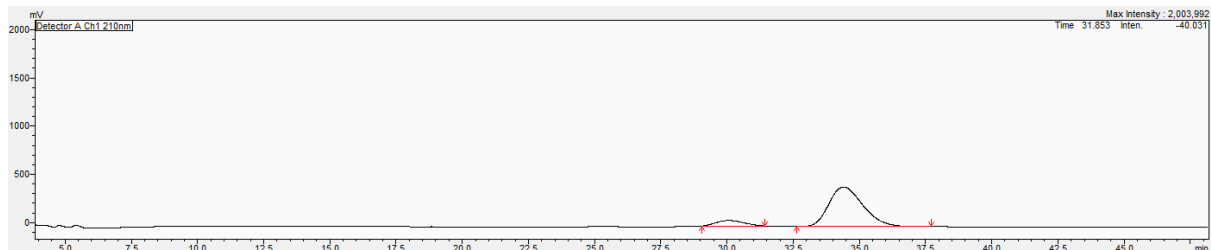

| Peak# | Ret. Time | Area     | Height | Mark | Conc.   |
|-------|-----------|----------|--------|------|---------|
| 1     | 30.055    | 4181386  | 57084  | M    | 10.162  |
| 2     | 34.404    | 36967724 | 411610 | M    | 89.838  |
| Total |           | 41149110 | 468694 |      | 100.000 |

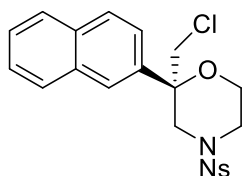

**2t**

41.9 mg, 94%,  $[\alpha]_D^{25} = +52.9$  ( $c$  1.0, MeOH, 78% ee); HPLC (Daicel Chiralcel OD-H, *i*-PrOH/Hexane = 35/65, 1.0 mL/min, 210 nm)  $t_1 = 30.2$  min (major),  $t_2 = 34.6$  min (minor).

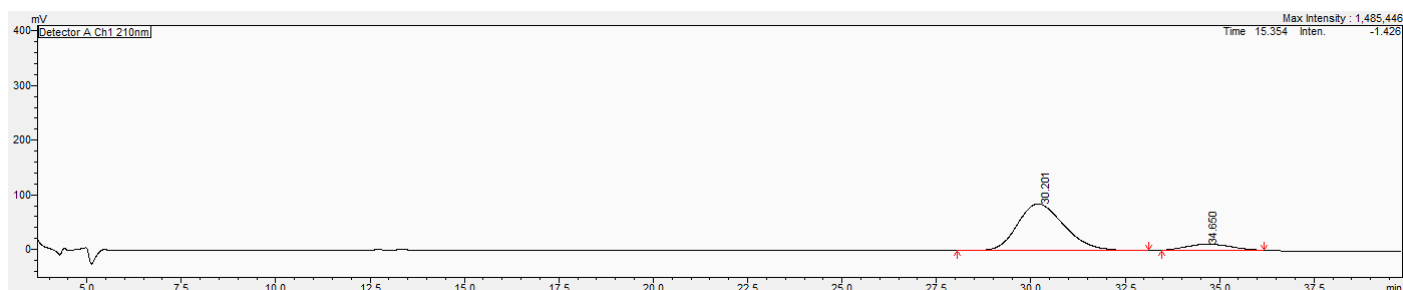

| Peak# | Ret. Time | Area    | Height | Mark | Conc.   |
|-------|-----------|---------|--------|------|---------|
| 1     | 30.201    | 7300560 | 85142  | M    | 88.971  |
| 2     | 34.650    | 905018  | 11213  | M    | 11.029  |
| Total |           | 8205578 | 96355  |      | 100.000 |

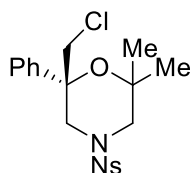

**ent-2u**

40.7 mg, 96%, yellow solid; MP 185–186 °C;  $[\alpha]_D^{25} = -67.3$  ( $c$  1.0, MeOH, 81% ee);  $^1\text{H}$  NMR (CDCl<sub>3</sub>, 400 MHz):  $\delta$  8.47 (d,  $J = 8.0$  Hz, 2H), 8.03 (d,  $J = 8.0$  Hz, 2H), 7.59–7.33 (m, 5H), 4.33 (d,  $J$

= 12.0 Hz, 1H), 3.68 (dd,  $J_1 = 12.0$  Hz,  $J_2 = 32.0$  Hz, 2H), 3.21 (d,  $J = 12.0$  Hz, 1H), 2.91 (d,  $J = 16.0$  Hz, 1H), 2.50 (d,  $J = 12.0$  Hz, 1H), 1.28 (s, 3H), 0.83 (s, 3H);  $^{13}\text{C}$  NMR ( $\text{CDCl}_3$ , 100 MHz):  $\delta$  150.5, 141.6, 140.5, 128.9, 128.4, 128.3, 126.8, 124.6, 75.4, 73.5, 55.1, 52.1, 48.8, 28.2, 26.5; HRMS (TOF)  $m/z$ :  $[\text{M}+\text{H}]^+$  Calcd for  $\text{C}_{19}\text{H}_{21}\text{ClN}_2\text{O}_5\text{S}$  425.7761; found 425.7763; HPLC (Daicel Chiralcel OD-H, *i*-PrOH/Hexane = 30/70, 1.0 mL/min, 210 nm)  $t_1 = 11.3$  min (major),  $t_2 = 16.6$  min (minor).

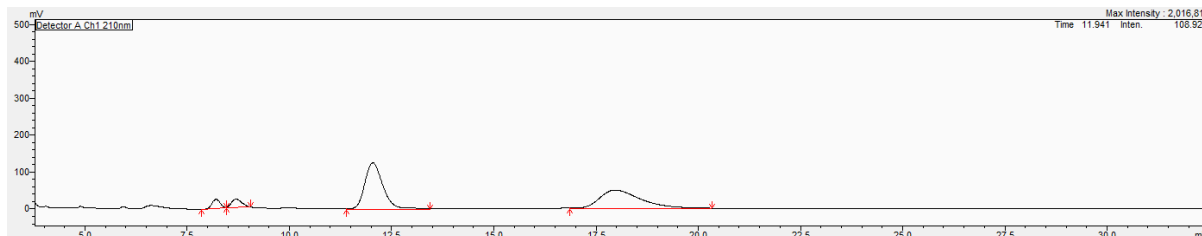

| Peak# | Ret. Time | Area    | Height | Mark | Conc.   |
|-------|-----------|---------|--------|------|---------|
| 1     | 8.207     | 319485  | 24027  | M    | 3.836   |
| 2     | 8.692     | 383772  | 21883  | M    | 4.607   |
| 3     | 12.039    | 3844212 | 125333 | V    | 46.151  |
| 4     | 17.969    | 3782088 | 51170  | V    | 45.406  |
| Total |           | 8329557 | 222414 |      | 100.000 |

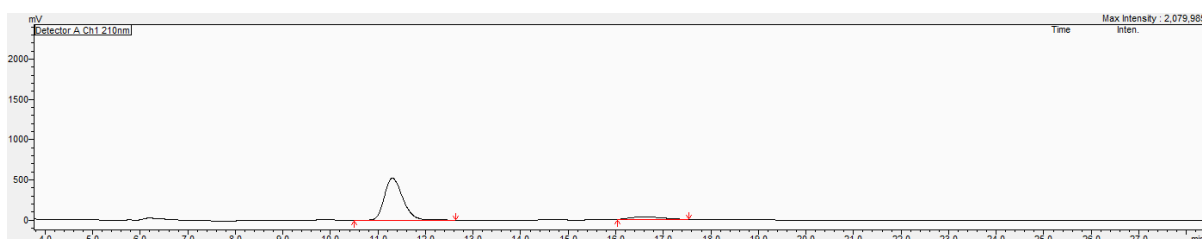

| Peak# | Ret. Time | Area     | Height | Mark | Conc.   |
|-------|-----------|----------|--------|------|---------|
| 1     | 11.304    | 13897456 | 522009 | M    | 90.286  |
| 2     | 16.593    | 1495206  | 31831  | M    | 9.714   |
| Total |           | 15392662 | 553840 |      | 100.000 |

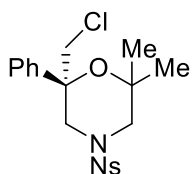

## 2u

41.1 mg, 97%,  $[\alpha]_D^{25} = -67.3$  ( $c$  1.0, MeOH, 81% ee); HPLC (Daicel Chiralcel OD-H, *i*-PrOH/Hexane = 30/70, 1.0 mL/min, 210 nm)  $t_1 = 11.7$  min (minor),  $t_2 = 16.5$  min (major).

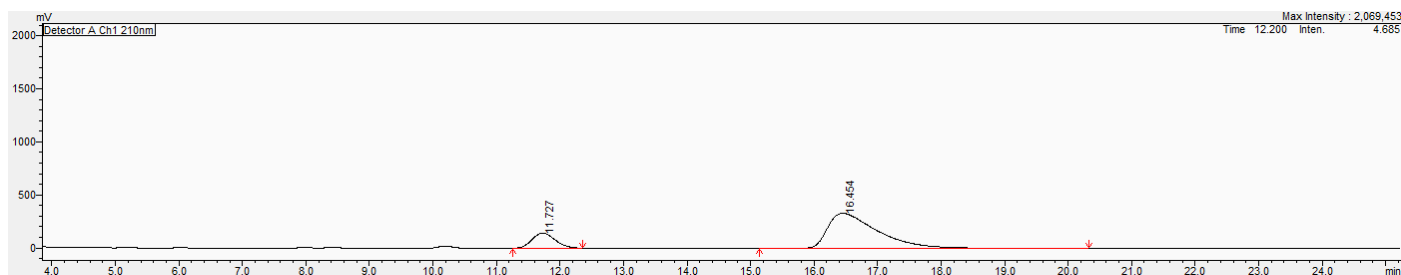

| Peak# | Ret. Time | Area     | Height | Mark | Conc.   |
|-------|-----------|----------|--------|------|---------|
| 1     | 11.727    | 3579575  | 142737 | M    | 16.707  |
| 2     | 16.454    | 17846049 | 329170 | M    | 83.293  |
| Total |           | 21425624 | 471907 |      | 100.000 |

## Synthesis of 4

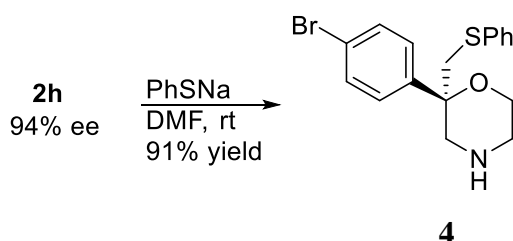

To a solution of **2h** (47.5 mg, 0.1 mmol, 1.0 equiv) in DMF (1.0 mL), was added sodium thiophenolate (132.0 mg, 1.0 mmol, 10.0 equiv) at room temperature. The mixture was then stirred for 12 h at room temperature. Then water and EtOAc were added. The organic layer was washed with water, and dried over magnesium sulfate. Concentration of the organic layer offered the crude product that was further purified by flash column chromatography (hexane/EtOAc) to give the corresponding **4** as yellow oil, 30.0 mg, 91%;  $[\alpha]_D^{25} = +32.7$  (*c* 1.0, MeOH, 94% ee);  $^1\text{H NMR}$  ( $\text{CDCl}_3$ , 400 MHz):  $\delta$  7.61-7.25 (m, 9H), 4.00-3.62 (m, 6H), 3.24-2.71 (m, 3H);  $^{13}\text{C NMR}$  ( $\text{CDCl}_3$ , 100 MHz):  $\delta$  146.5, 137.1, 134.7, 132.0, 131.4, 130.7, 130.0, 129.5, 128.9, 128.2, 127.1, 122.7, 76.6, 61.1, 49.8, 49.4, 45.4; HRMS (TOF) *m/z*:  $[\text{M}+\text{H}]^+$  Calcd for  $\text{C}_{17}\text{H}_{19}\text{BrNOS}$  364.1977; found 364.1978; HPLC (Daicel Chiralcel IC, *i*-PrOH/Hexane = 20/80, 1.0 mL/min, 254 nm)  $t_1 = 12.1$  min (major),  $t_2 = 19.3$  min (minor).

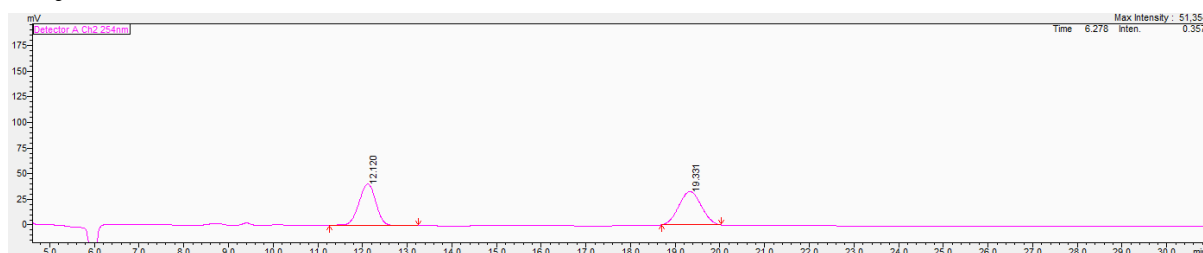

| Peak# | Ret. Time | Area    | Height | Mark | Conc.   |
|-------|-----------|---------|--------|------|---------|
| 1     | 12.120    | 1046833 | 40136  | M    | 48.802  |
| 2     | 19.331    | 1098216 | 32081  | M    | 51.198  |
| Total |           | 2145049 | 72216  |      | 100.000 |

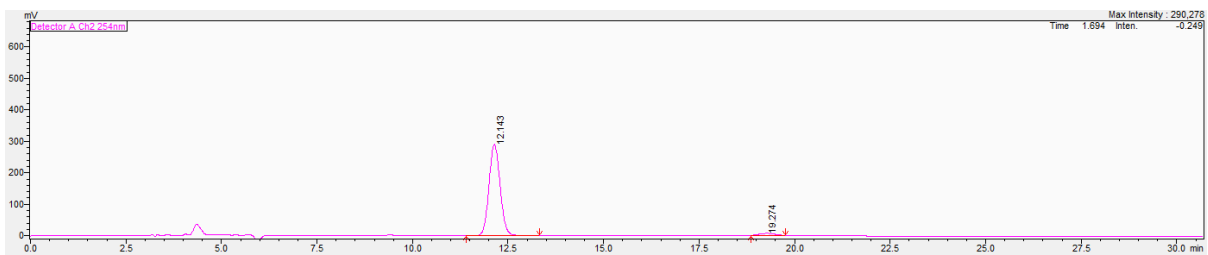

| Peak# | Ret. Time | Area    | Height | Mark | Conc.   |
|-------|-----------|---------|--------|------|---------|
| 1     | 12.143    | 5849053 | 289584 | M    | 96.927  |
| 2     | 19.274    | 185456  | 6532   | M    | 3.073   |
| Total |           | 6034509 | 296116 |      | 100.000 |

### X-ray of *ent-2a*

**Sample preparation for crystal growth:** Compound *ent-2a* (20 mg) was dissolved in EtOAc/Hexane (v/v = 1 mL / 2 mL), while slow evaporation of solvent at room temperature white crystals were grown.

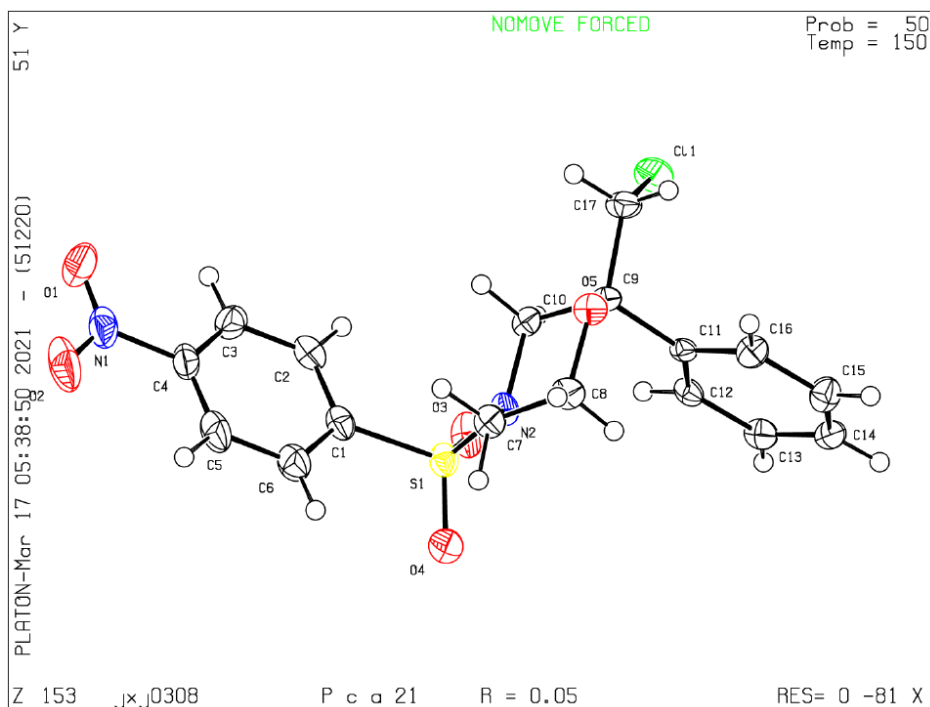

Thermal ellipsoids are shown at 50% probability.



---

Bond precision: C-C = 0.0067 A                      Wavelength=1.54184  
Cell:                      a=15.0862(5)              b=9.1161(4)              c=12.7347(6)  
                                    alpha=90                      beta=90                      gamma=90  
Temperature:              150 K

|                | Calculated         | Reported           |
|----------------|--------------------|--------------------|
| Volume         | 1751.37(13)        | 1751.37(13)        |
| Space group    | P c a 21           | P c a 21           |
| Hall group     | P 2c -2ac          | P 2c -2ac          |
| Moiety formula | C17 H17 Cl N2 O5 S | C17 H17 Cl N2 O5 S |
| Sum formula    | C17 H17 Cl N2 O5 S | C17 H17 Cl N2 O5 S |
| Mr             | 396.84             | 396.83             |
| Dx,g cm-3      | 1.505              | 1.505              |
| Z              | 4                  | 4                  |
| Mu (mm-1)      | 3.338              | 3.338              |
| F000           | 824.0              | 824.0              |
| F000'          | 829.16             |                    |
| h,k,lmax       | 18,11,15           | 18,11,15           |
| Nref           | 3546 [ 1859]       | 3034               |
| Tmin,Tmax      | 0.658,0.693        | 0.133,1.000        |
| Tmin'          | 0.597              |                    |

Correction method= # Reported T Limits: Tmin=0.133 Tmax=1.000  
AbsCorr = MULTI-SCAN

Data completeness= 1.63/0.86                      Theta(max)= 73.762  
R(reflections)= 0.0546( 2947)                      wR2(reflections)= 0.1497( 3034)  
S = 1.034                                              Npar= 235

---

# $^1\text{H}/^{13}\text{C}$ Spectra

JXJ2021.02150.1.fid

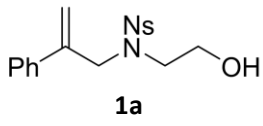

400 MHz,  $\text{CDCl}_3$

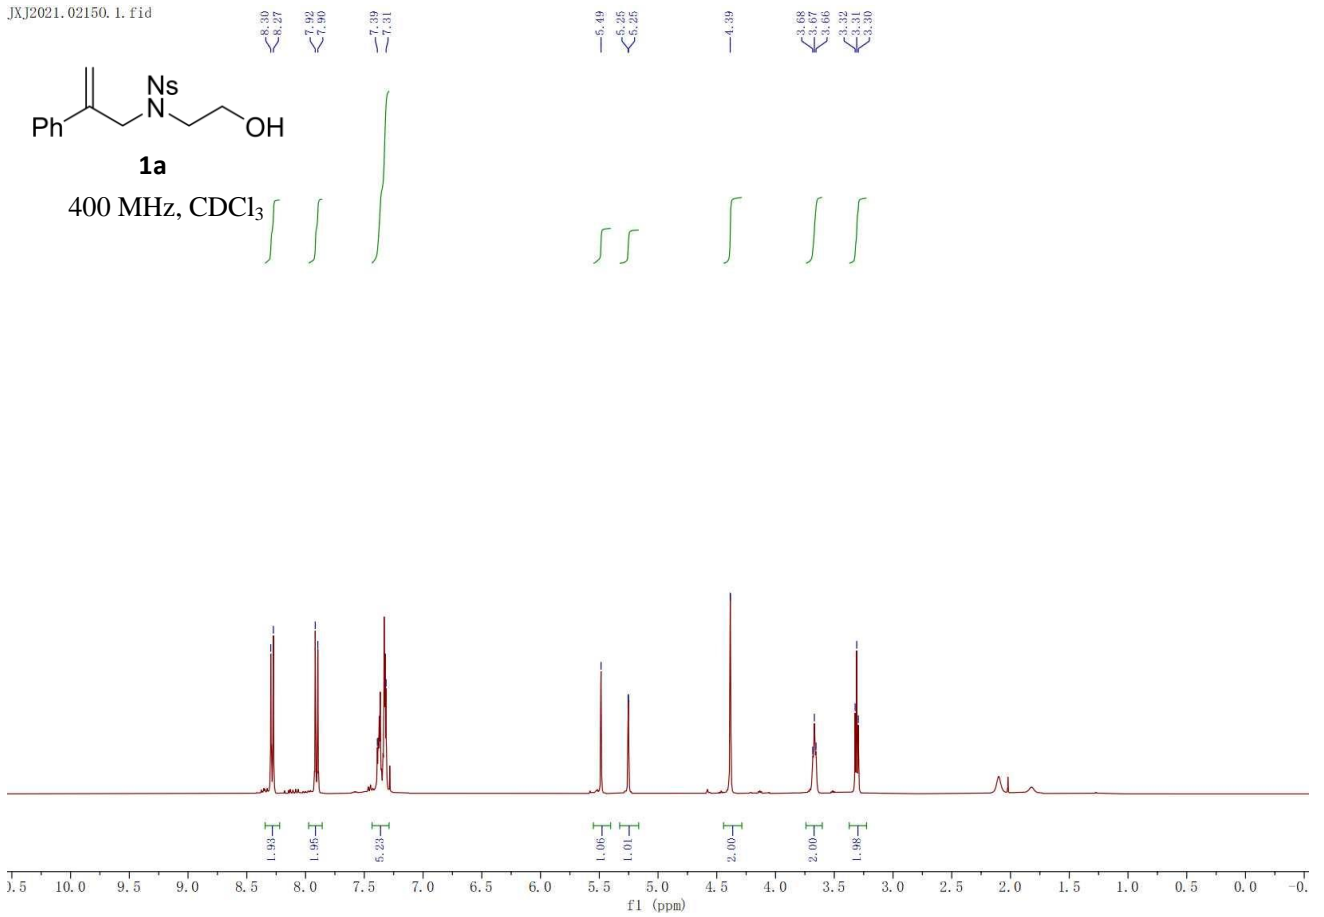

JXJ2021.02150.2.fid

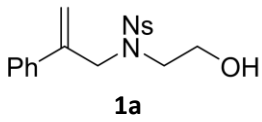

100 MHz,  $\text{CDCl}_3$

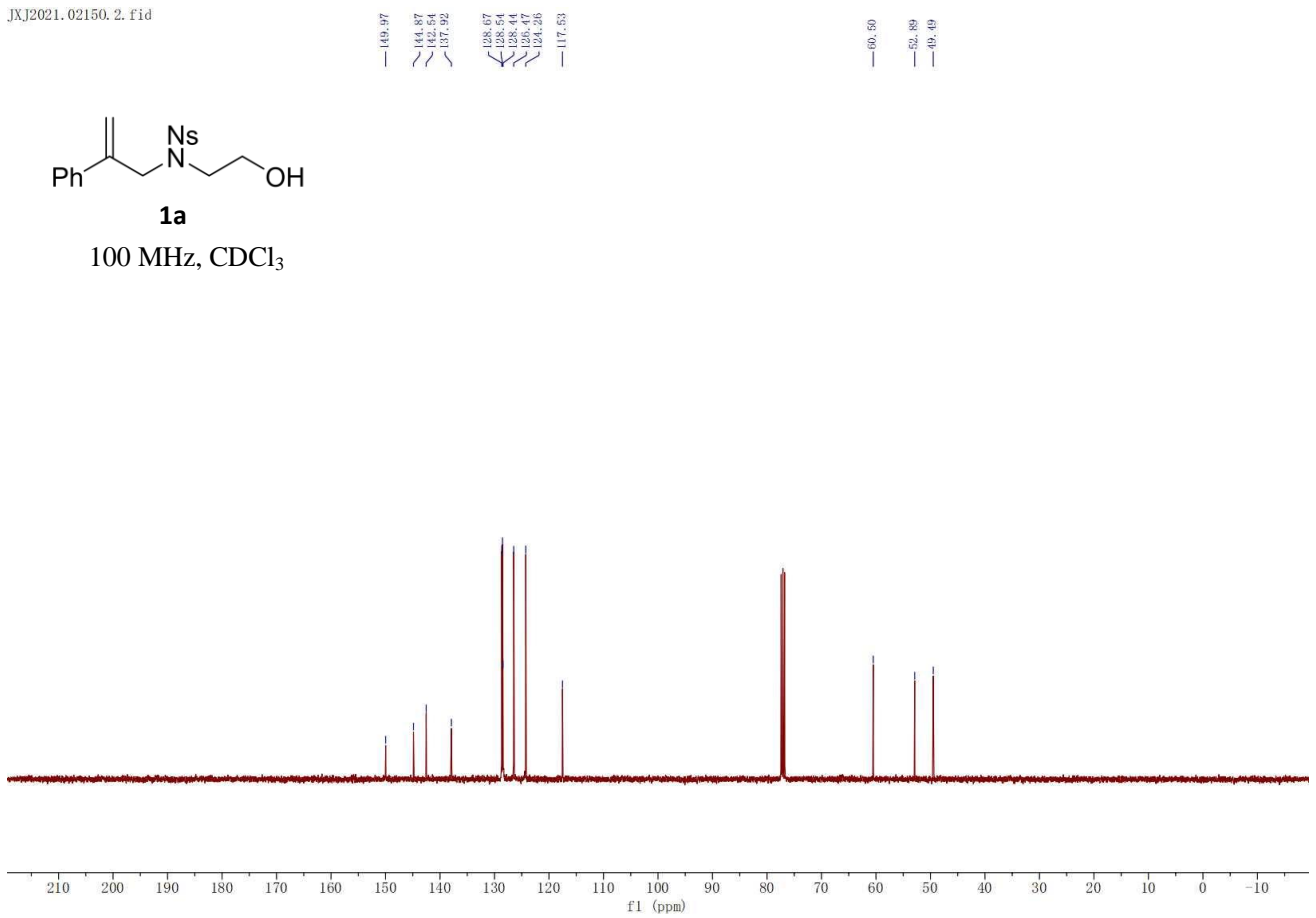

JXJ2021.0123B. 1. fid

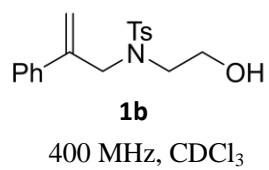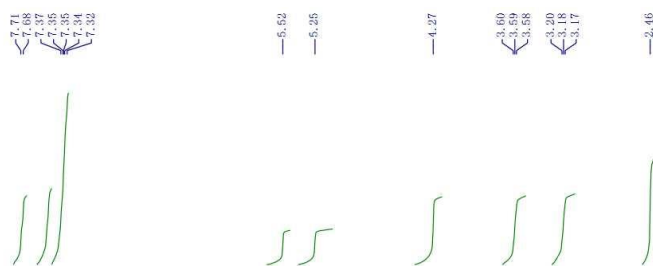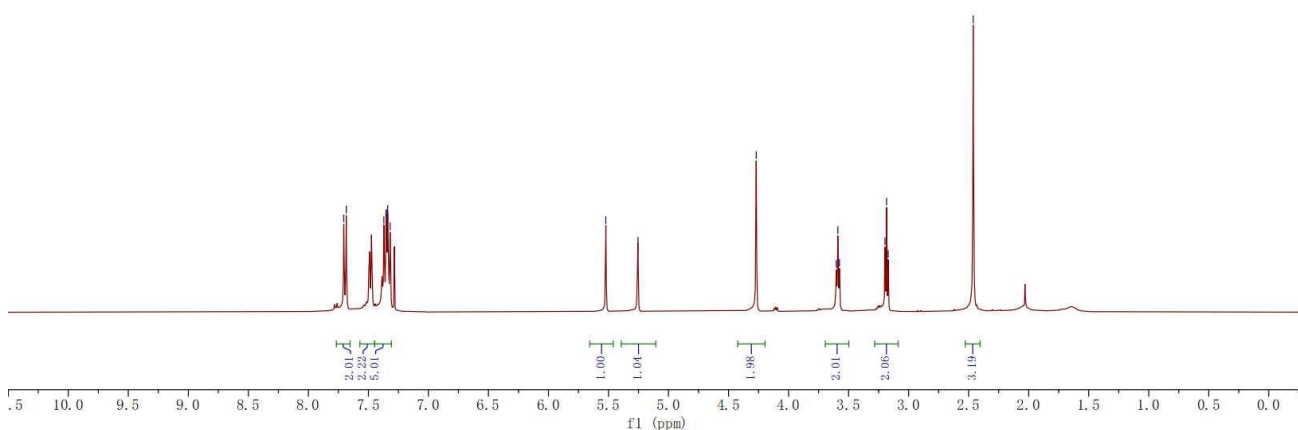

JXJ2021.0123B. 2. fid

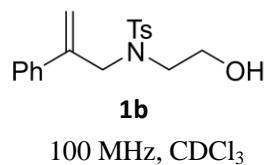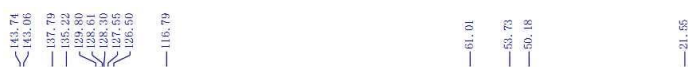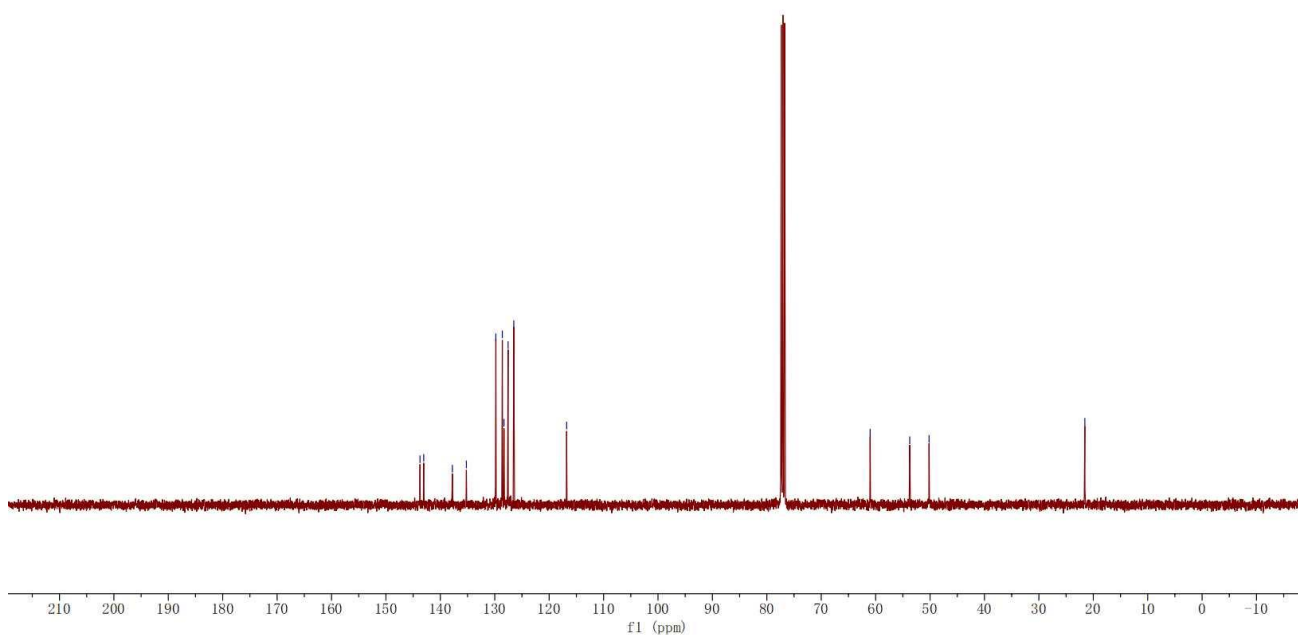

XX2021.1113A-对氟.1.fid  
X

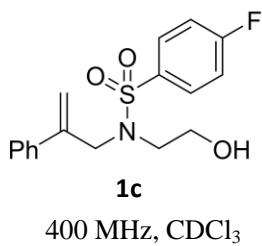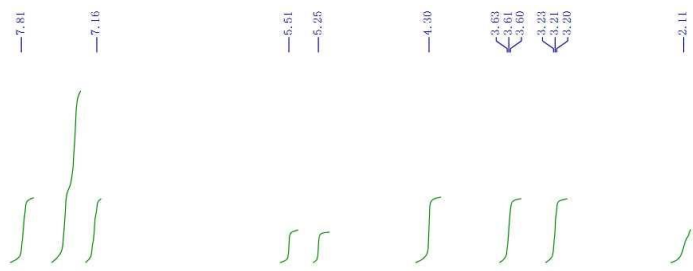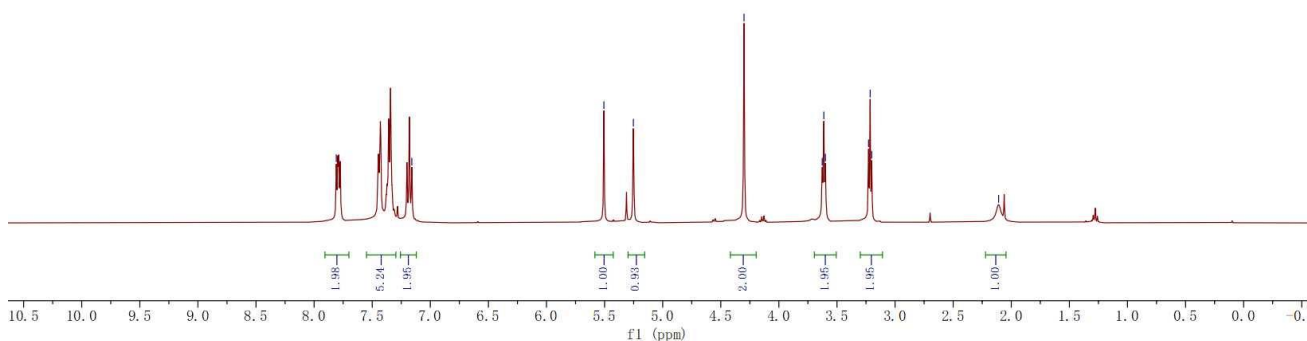

XX2021.1113A-对氟.2.fid  
X

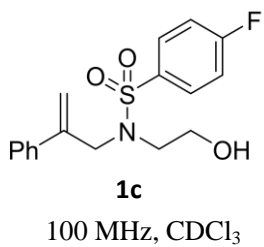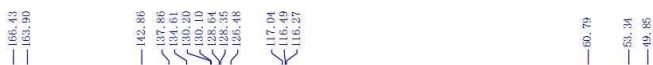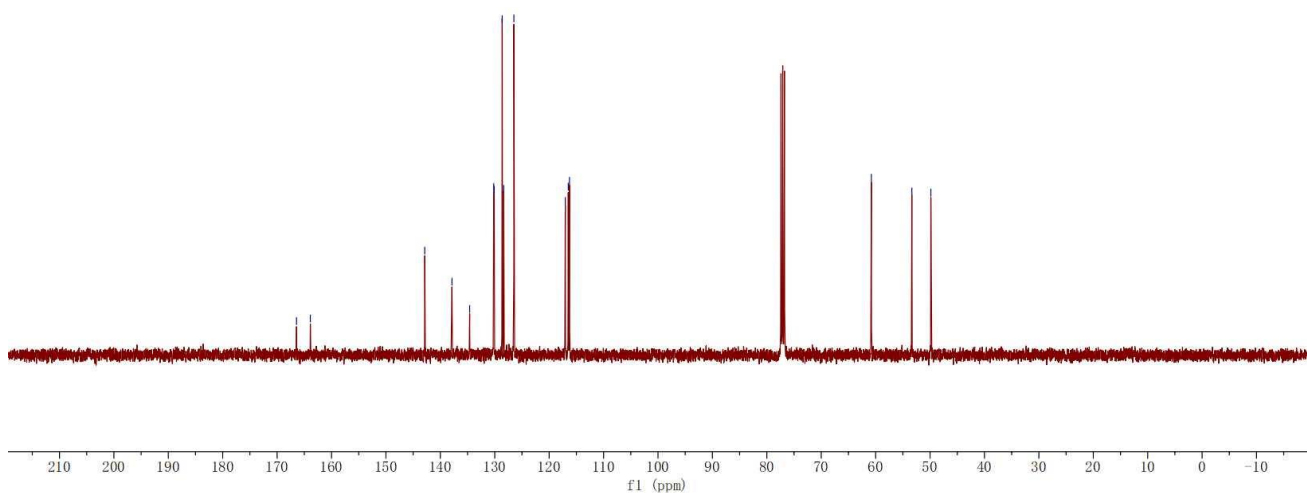

JXJ2021.1031K.1.fid

1

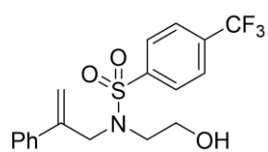

**1d**

400 MHz, CDCl<sub>3</sub>

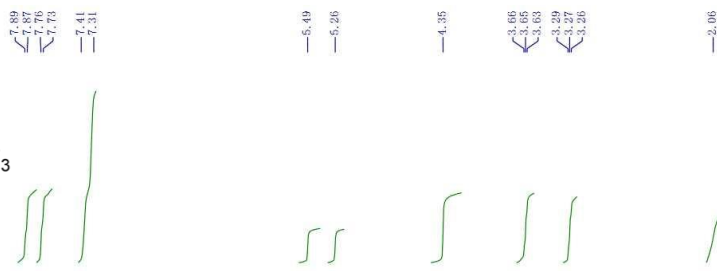

JXJ2021.1031K.2.fid

1

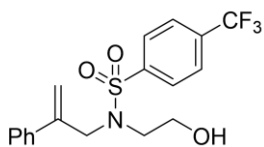

**1d**

100 MHz, CDCl<sub>3</sub>

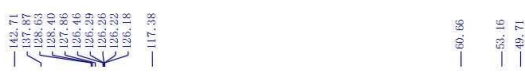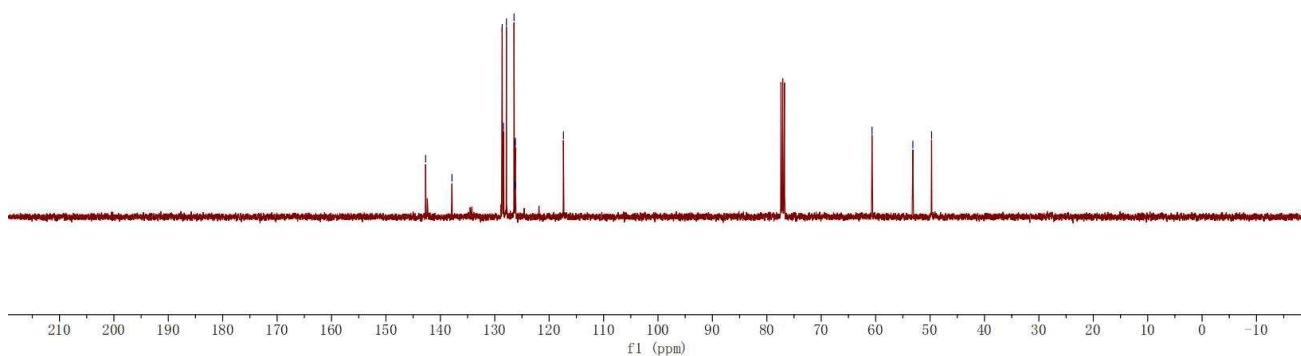

GM. 2021.3.23A. 1. fid  
H

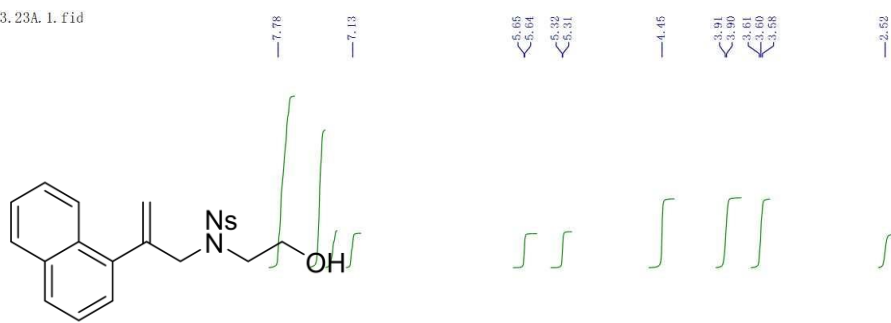

GM. 2021.3.23A. 2. fid  
H

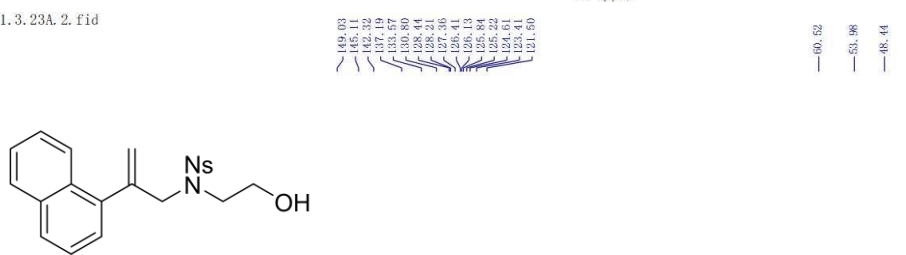

xx. 2021.08.27. a-对氟. 1.fid  
1

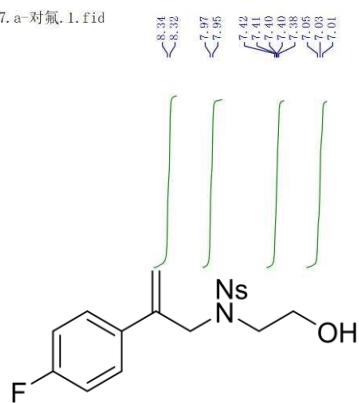

**1f**

400 MHz, CDCl<sub>3</sub>

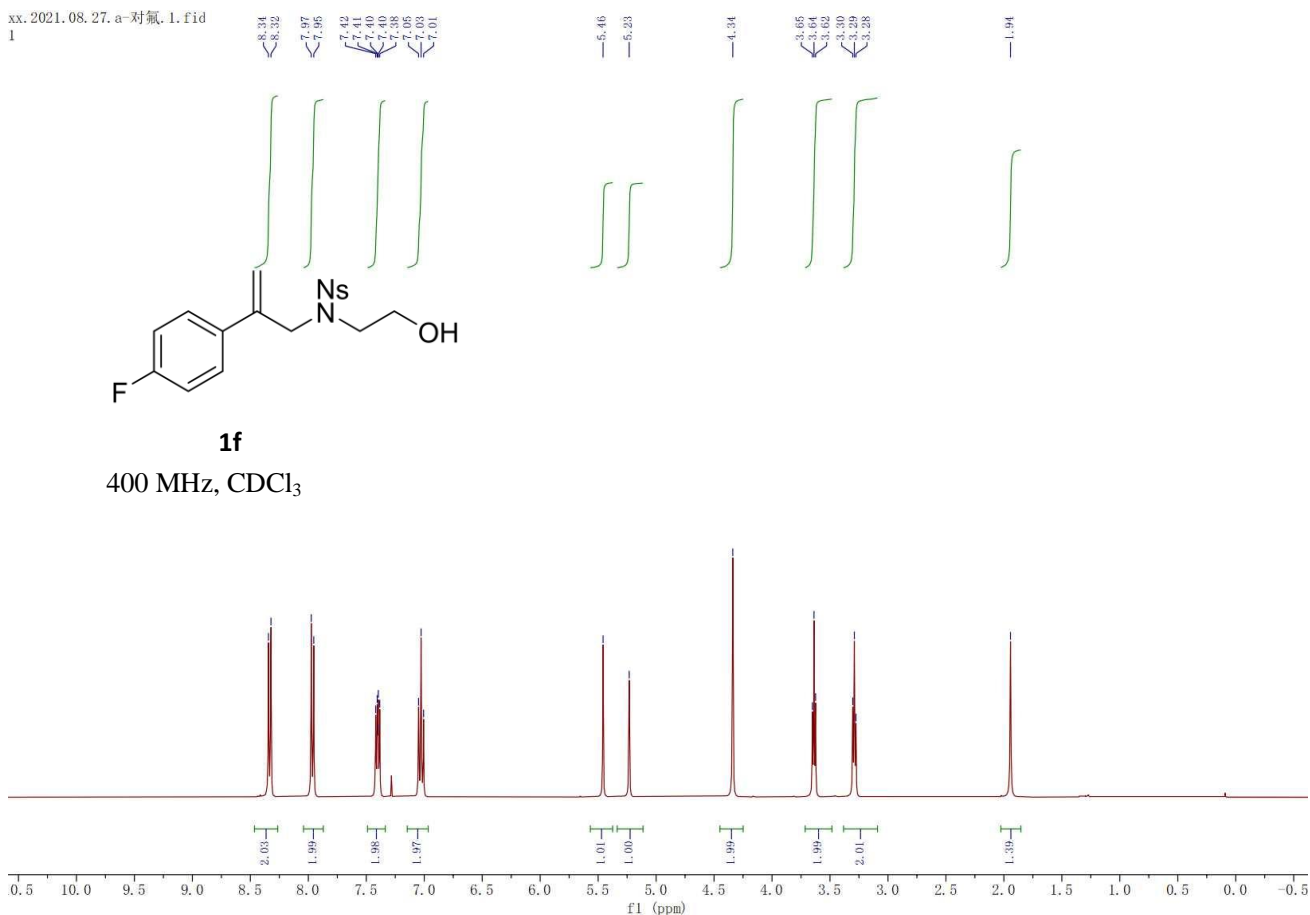

xx. 2021.08.27. a-对氟. 2.fid

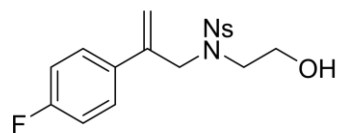

**1f**

100 MHz, CDCl<sub>3</sub>

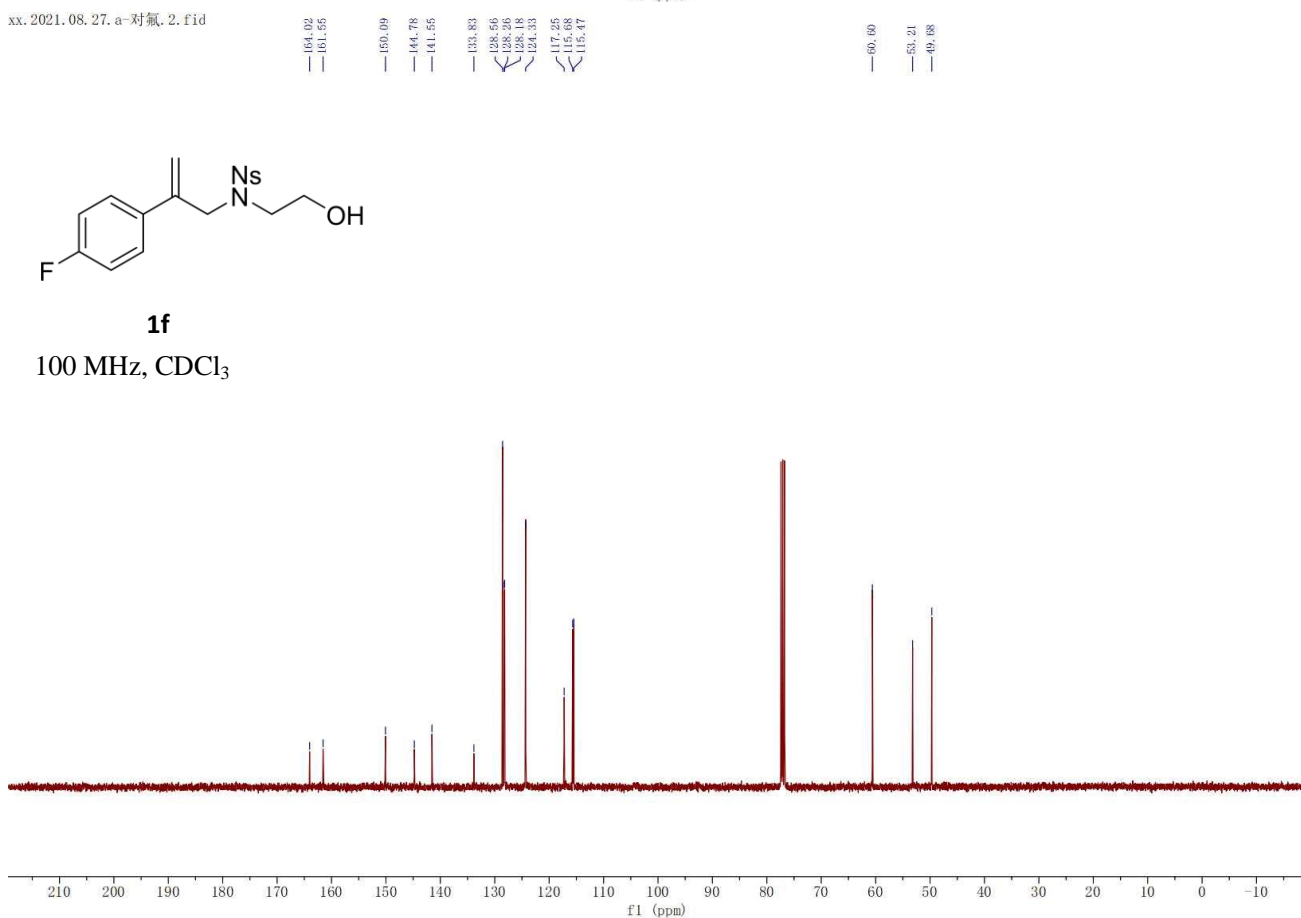

xx. 2021.09.01. a-对氯. 1.fid

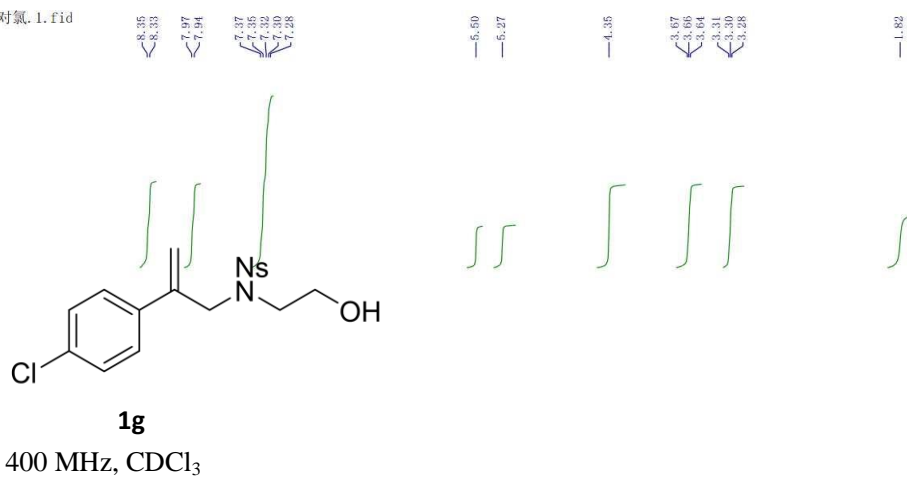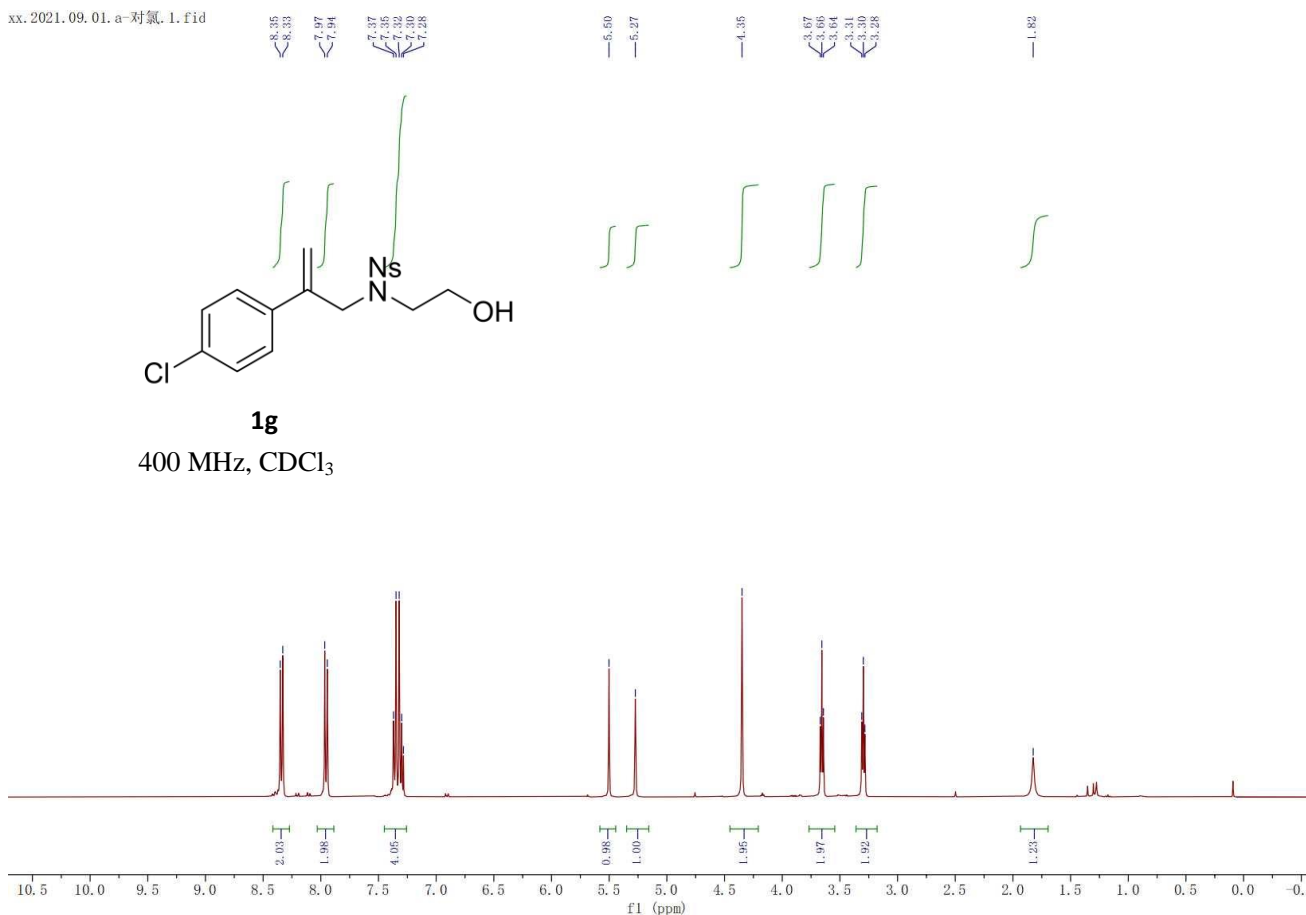

xx. 2021.09.01. a-对氯. 2.fid

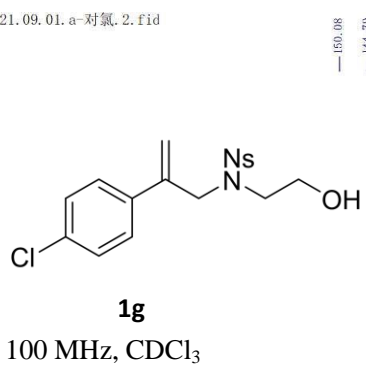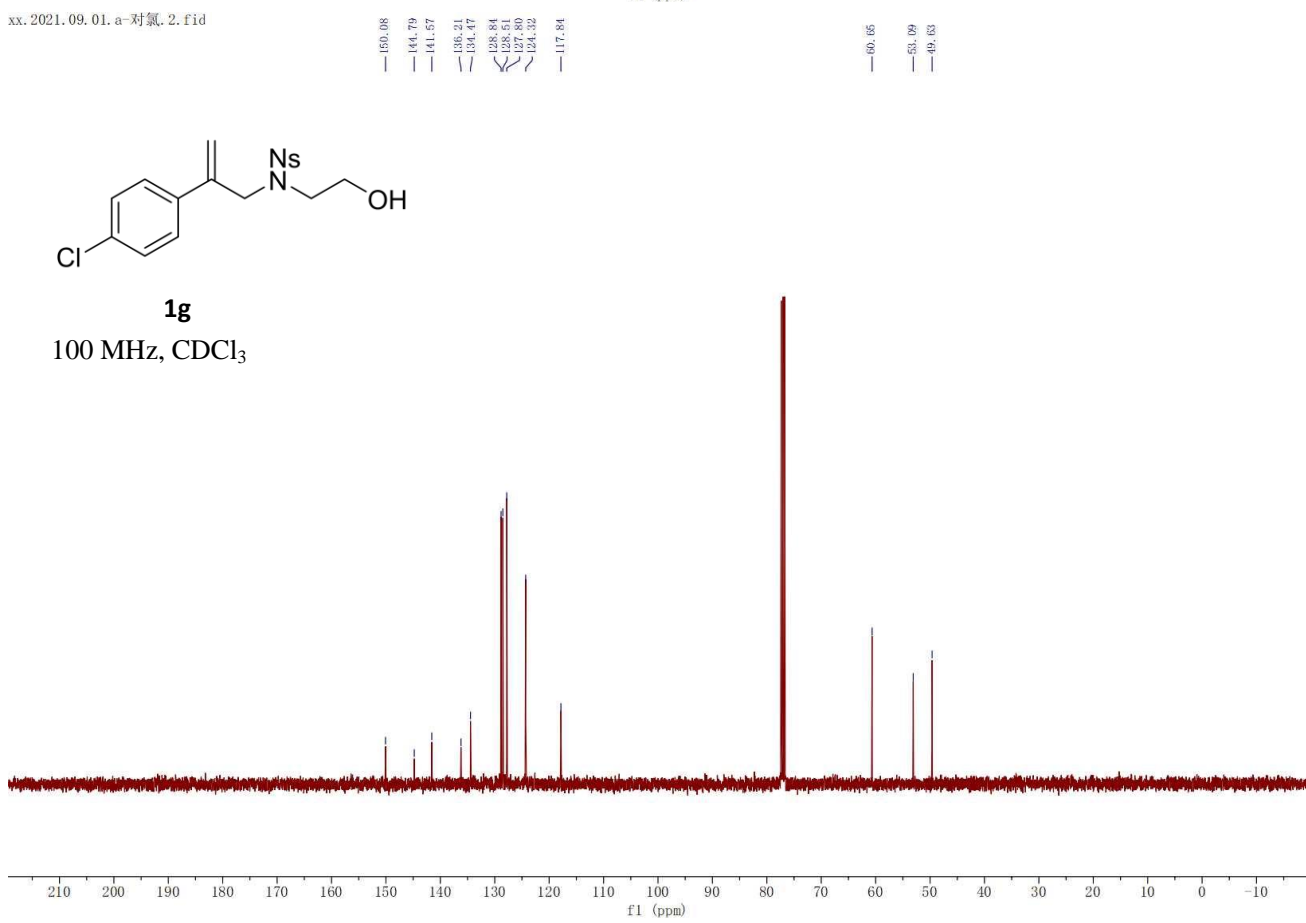



xx. 2021.09.11. a-对溴. 1.fid

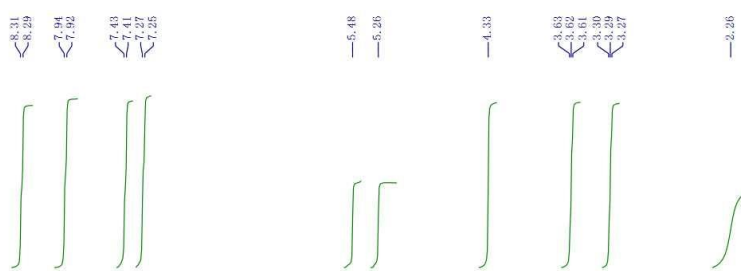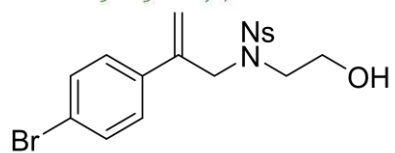

**1h**

400 MHz, CDCl<sub>3</sub>

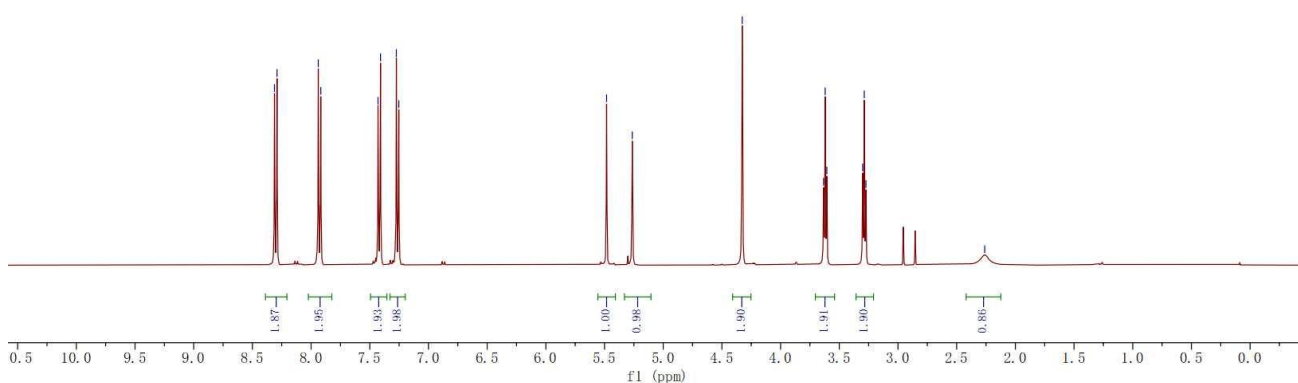

xx. 2021.09.11. a-对溴. 2.fid

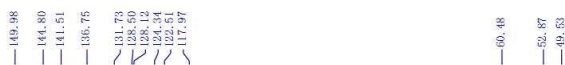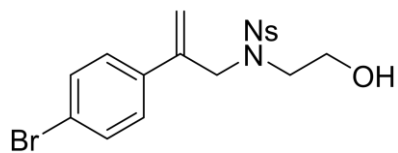

**1h**

100 MHz, CDCl<sub>3</sub>

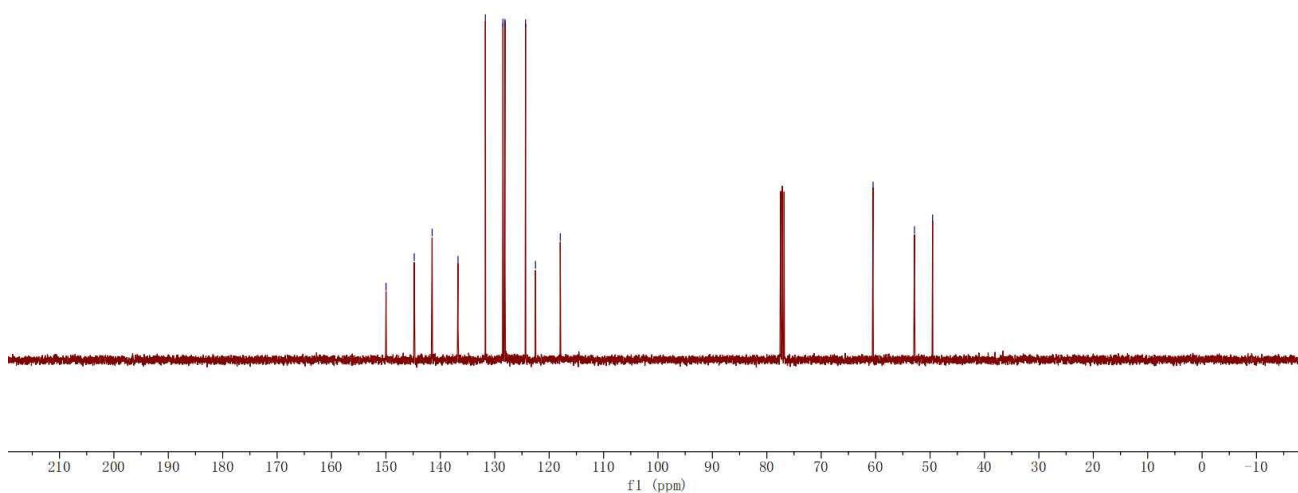

xx2021.1125a-碘代.1.fid  
1

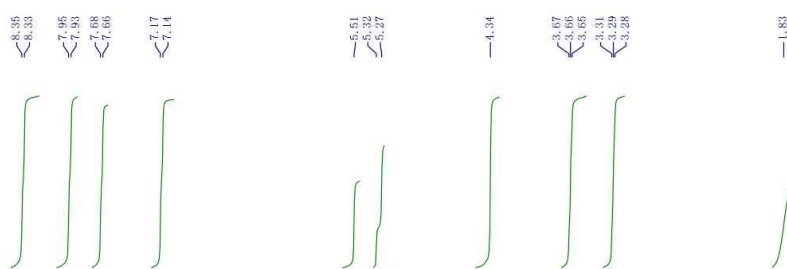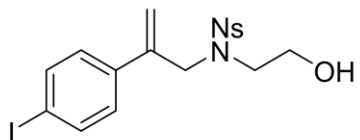

**1i**

400 MHz, CDCl<sub>3</sub>

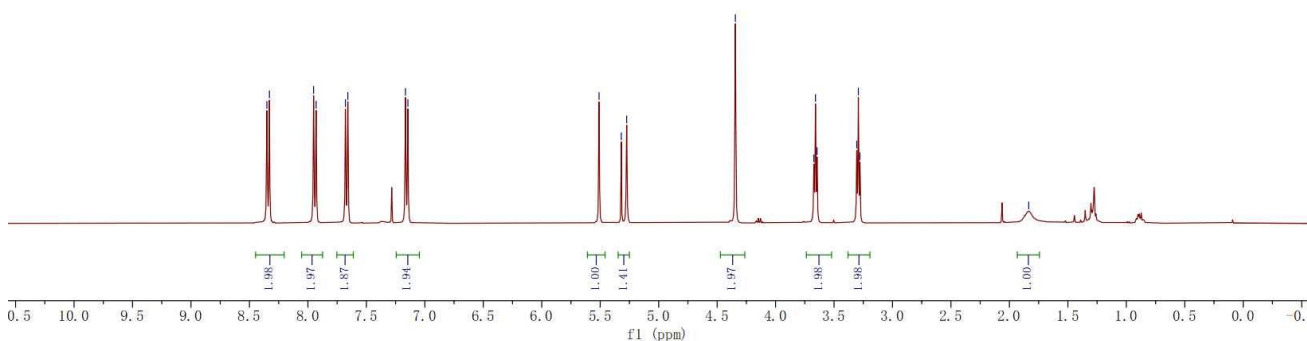

xx2021.1125a-碘代.2.fid  
1

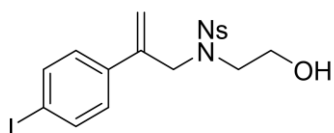

**1i**

100 MHz, CDCl<sub>3</sub>

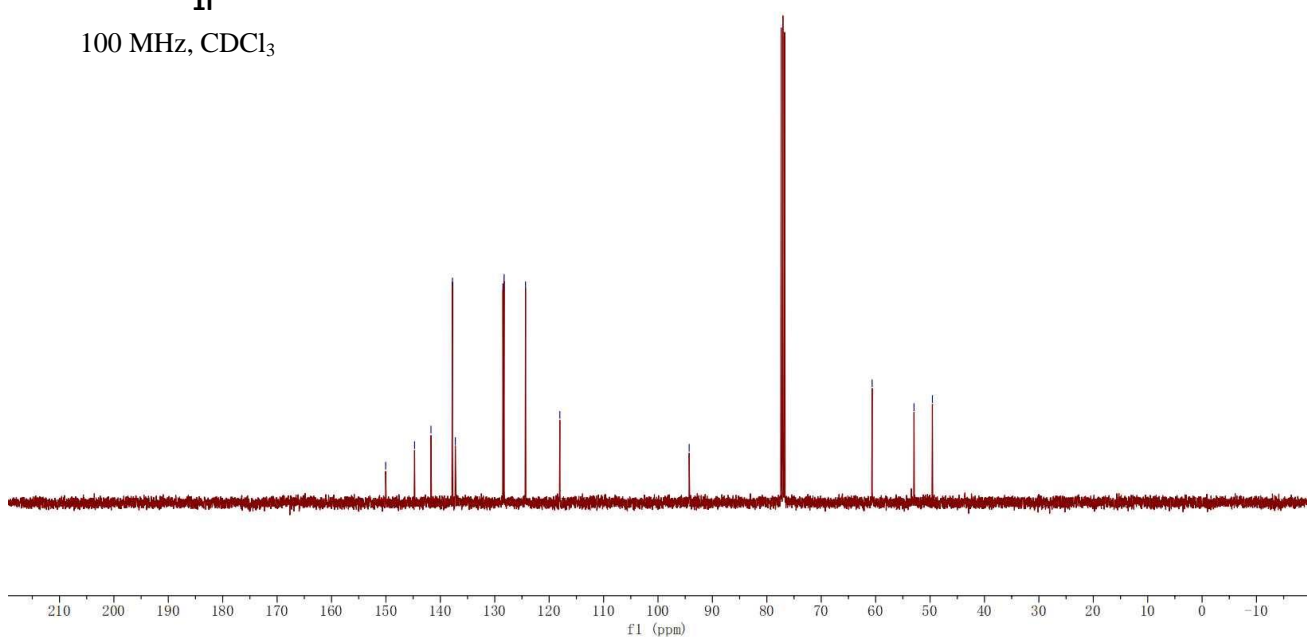

xx. 2021.08.27. c-对三氟, 1. fid  
1

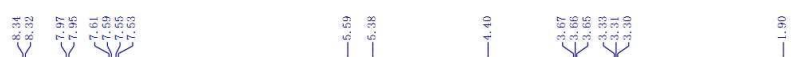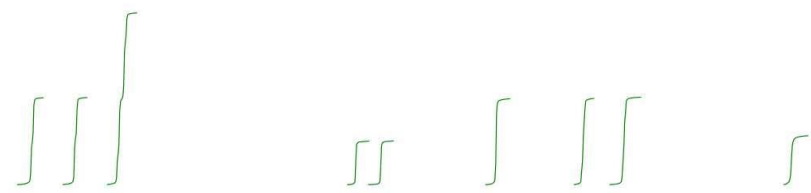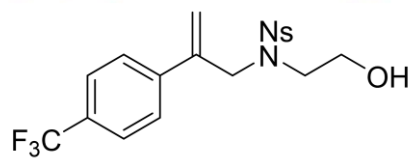

**1j**  
400 MHz, CDCl<sub>3</sub>

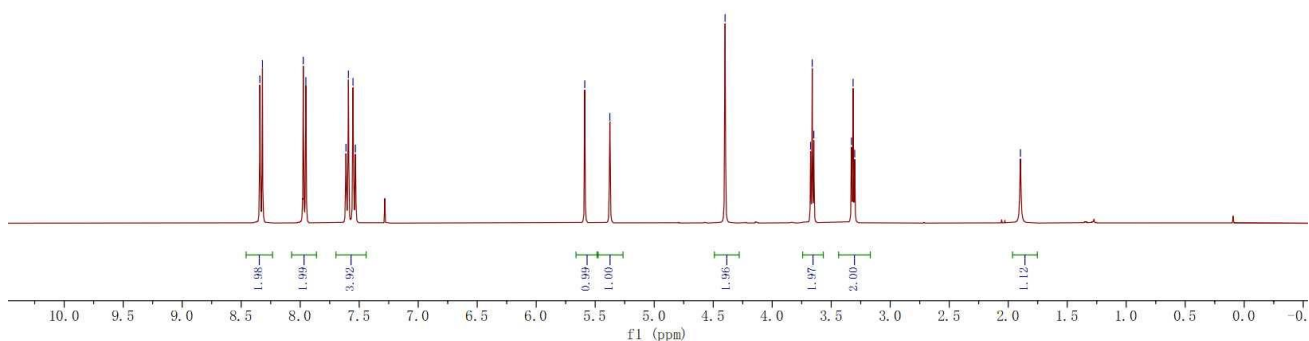

xx. 2021.08.27. c-对三氟, 2. fid

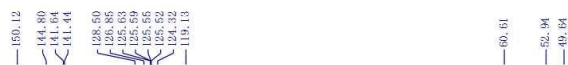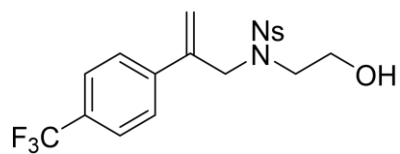

**1j**  
100 MHz, CDCl<sub>3</sub>

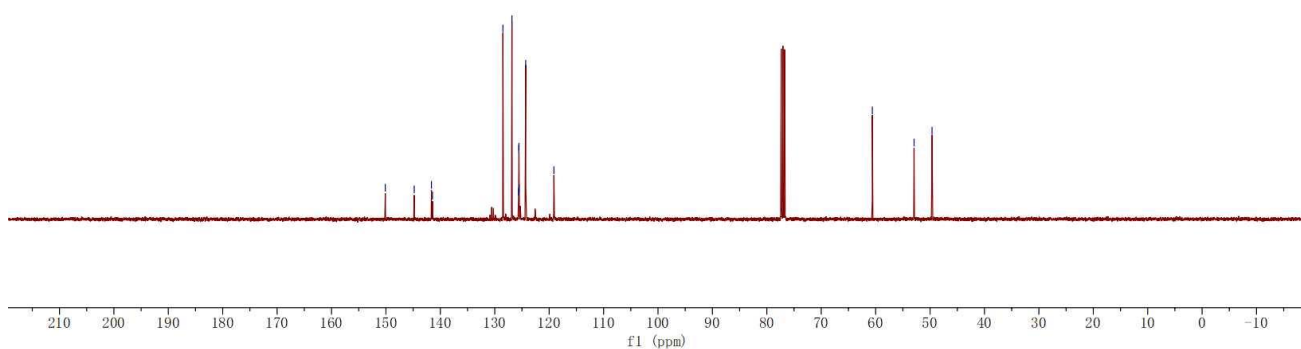

xx2021.0704a.1.fid  
1

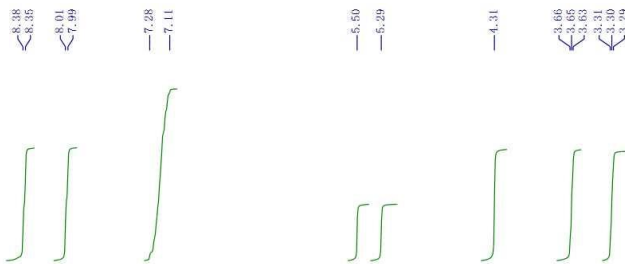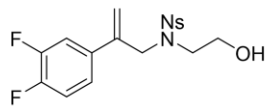

**1k**

400 MHz, CDCl<sub>3</sub>

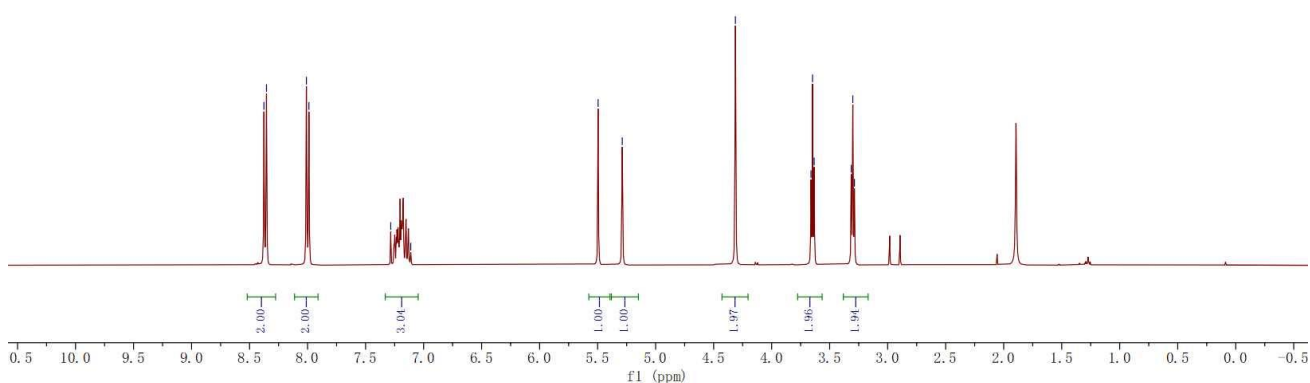

xx2021.0704a.2.fid  
1

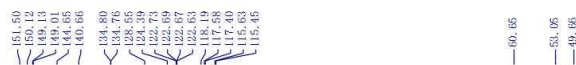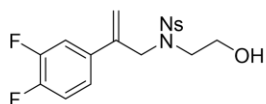

**1k**

100 MHz, CDCl<sub>3</sub>

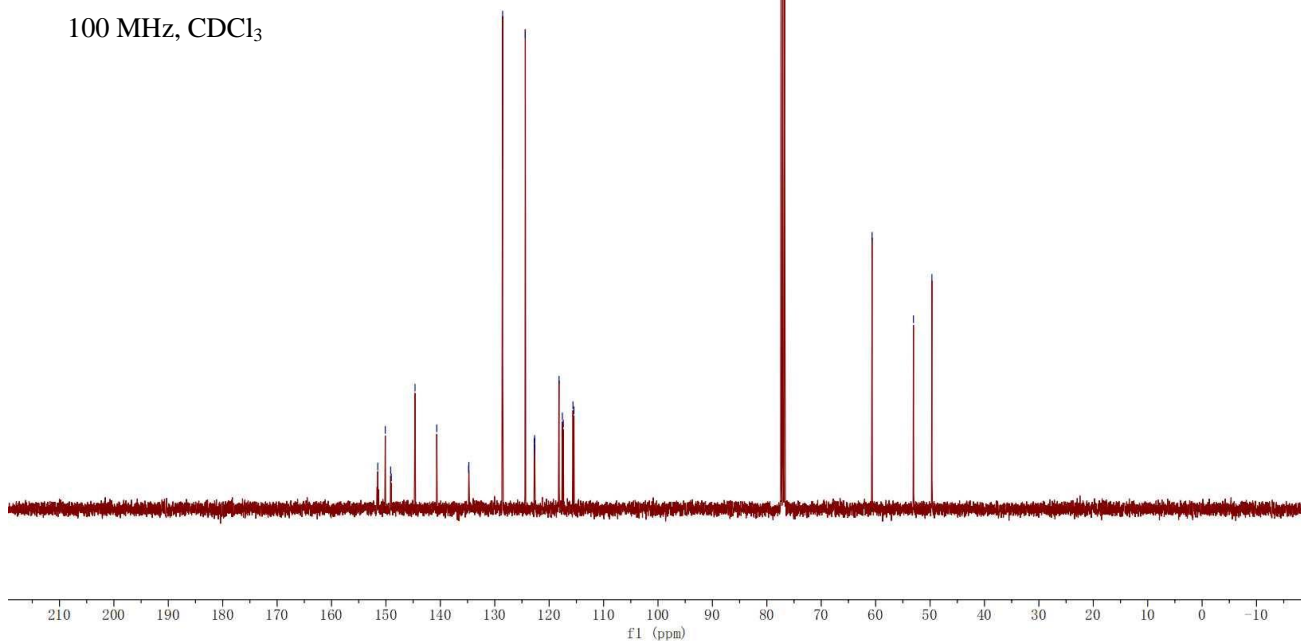

xx2021.0611c-二氯.1.fid  
1

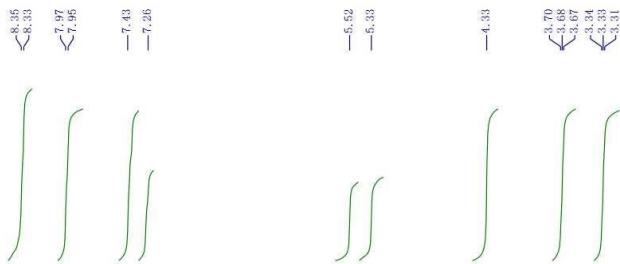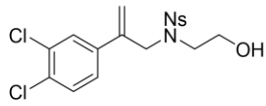

**11**

400 MHz, CDCl<sub>3</sub>

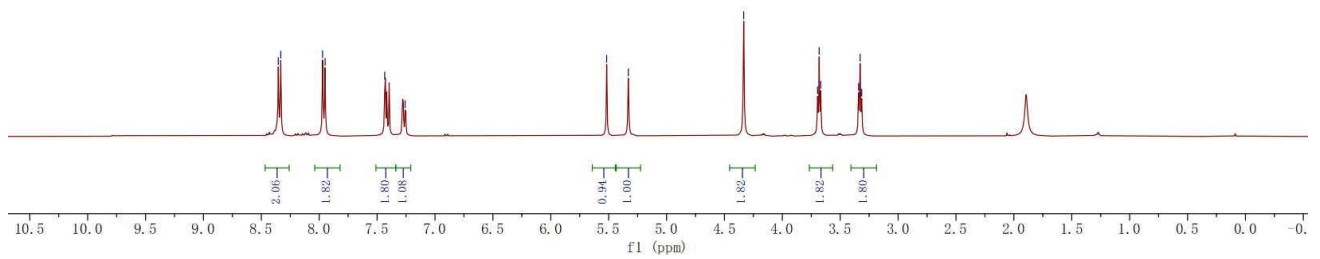

xx2021.0611c-二氯.2.fid  
1

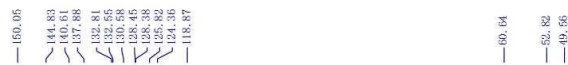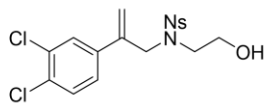

**11**

100 MHz, CDCl<sub>3</sub>

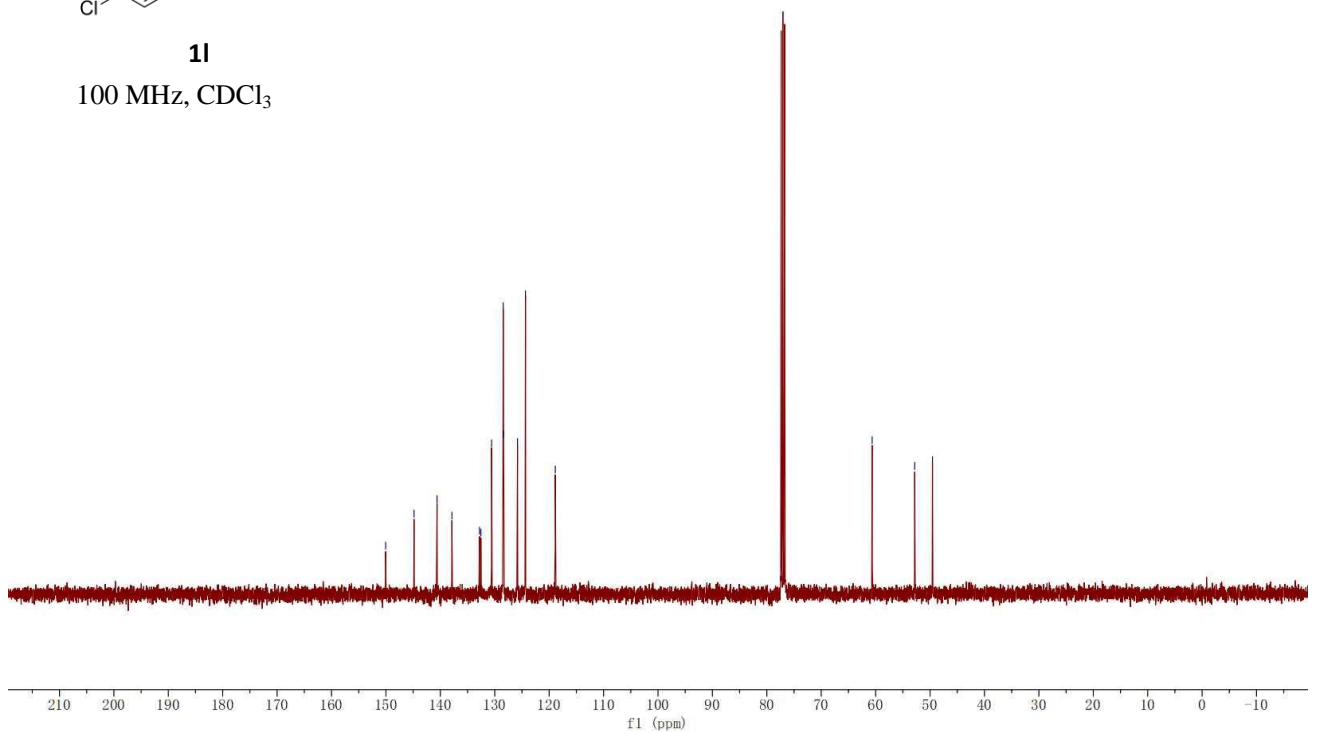

jxj2021.1111E.1.fid

1

7.69  
7.67  
7.33  
7.31  
5.51  
5.32  
4.22  
3.62  
3.59  
3.21  
3.19  
2.46  
2.08

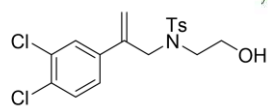

**1m**

400 MHz, CDCl<sub>3</sub>

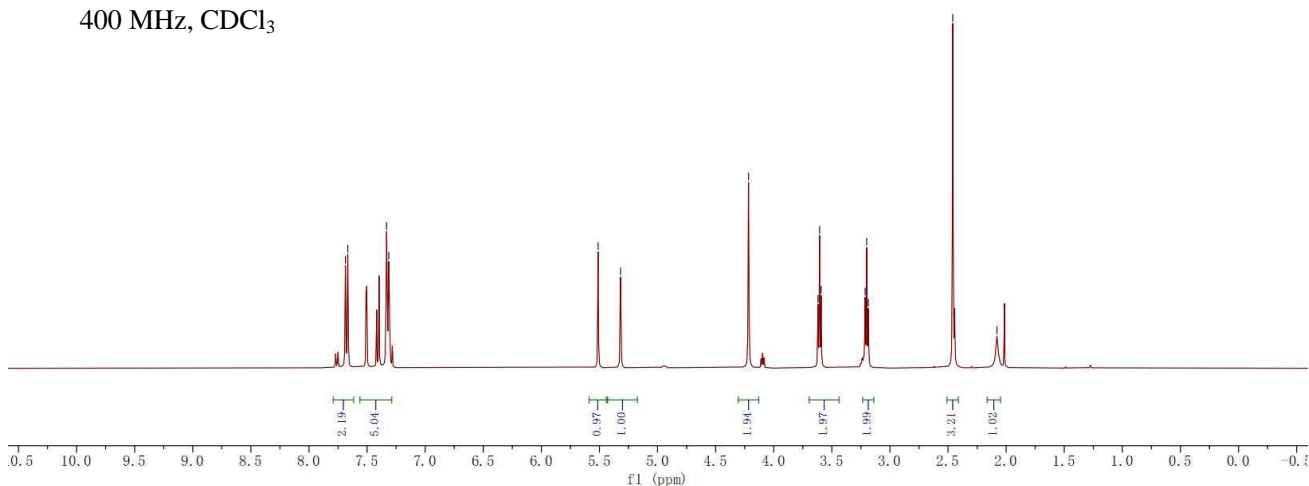

jxj2021.1111E.2.fid

1

143.95  
141.10  
137.97  
137.97  
132.68  
132.25  
130.48  
129.86  
129.86  
127.39  
127.05  
125.87  
118.43  
60.99  
53.40  
49.97  
21.58

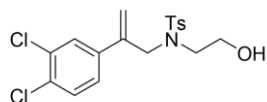

**1m**

100 MHz, CDCl<sub>3</sub>

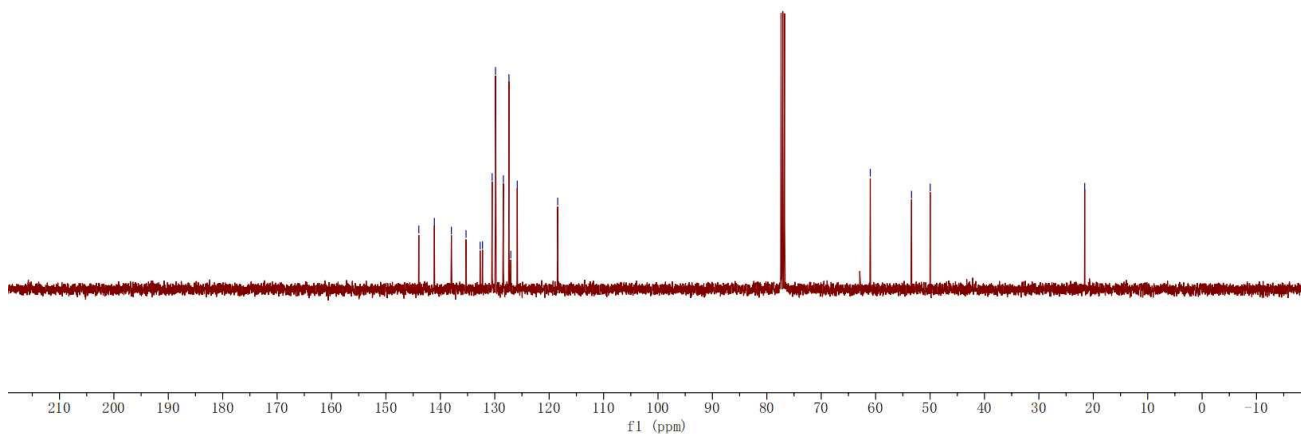

gm2021.0330a.1.fid

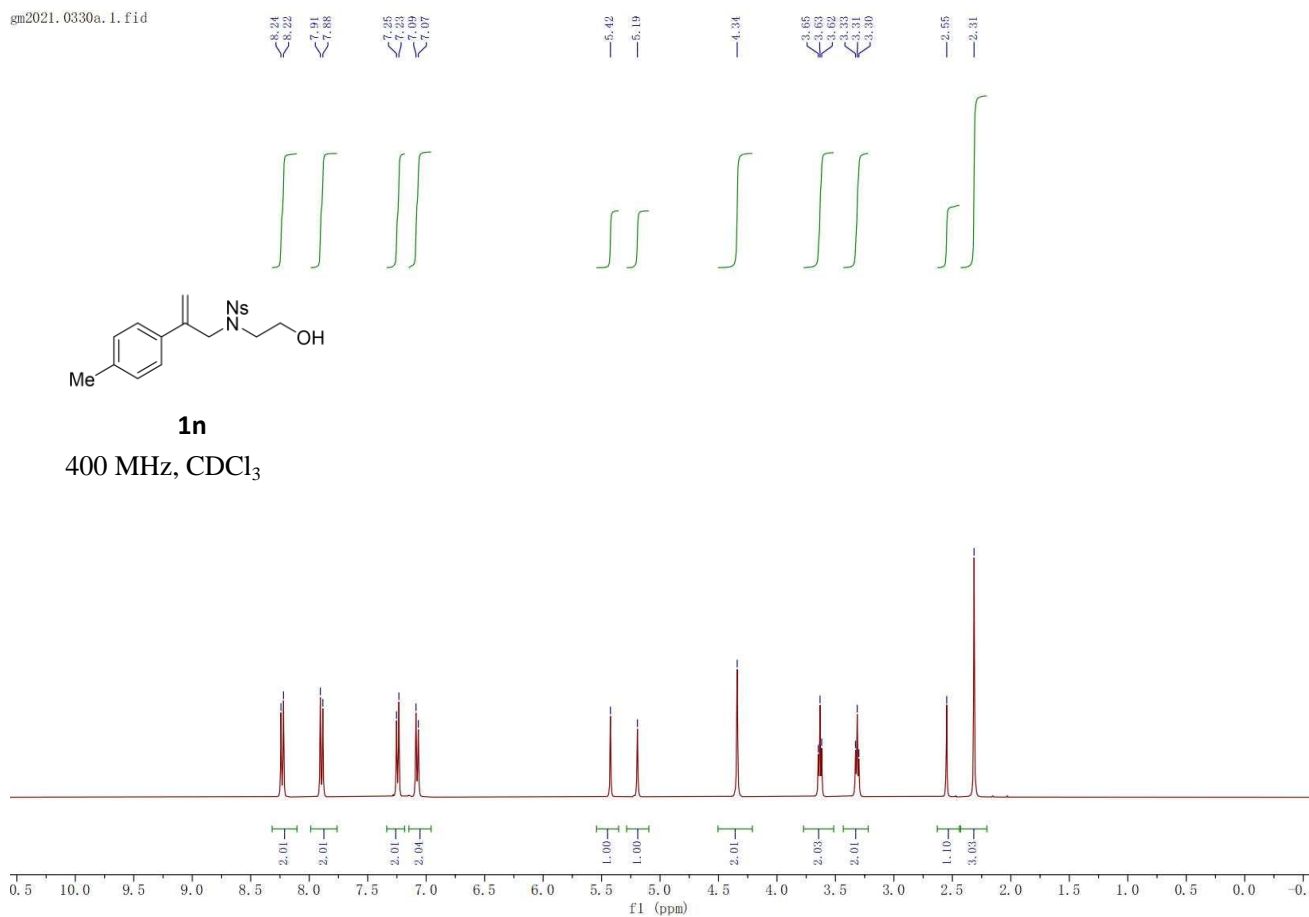

gm2021.0330a.2.fid

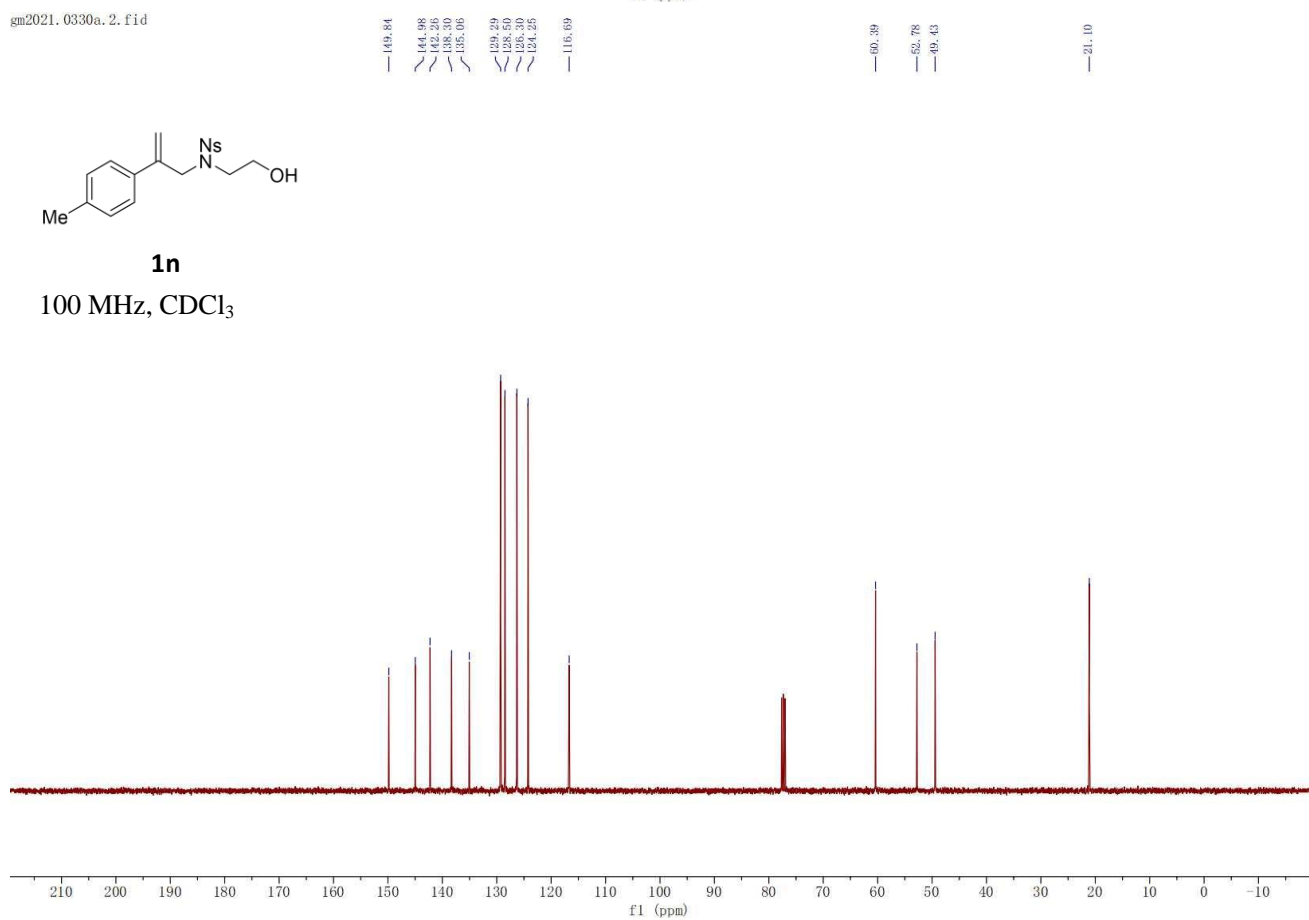

zyc2021.0221j.1.fid

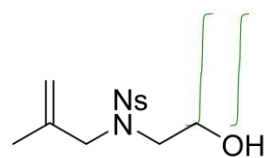

**1o**  
400 MHz, CDCl<sub>3</sub>

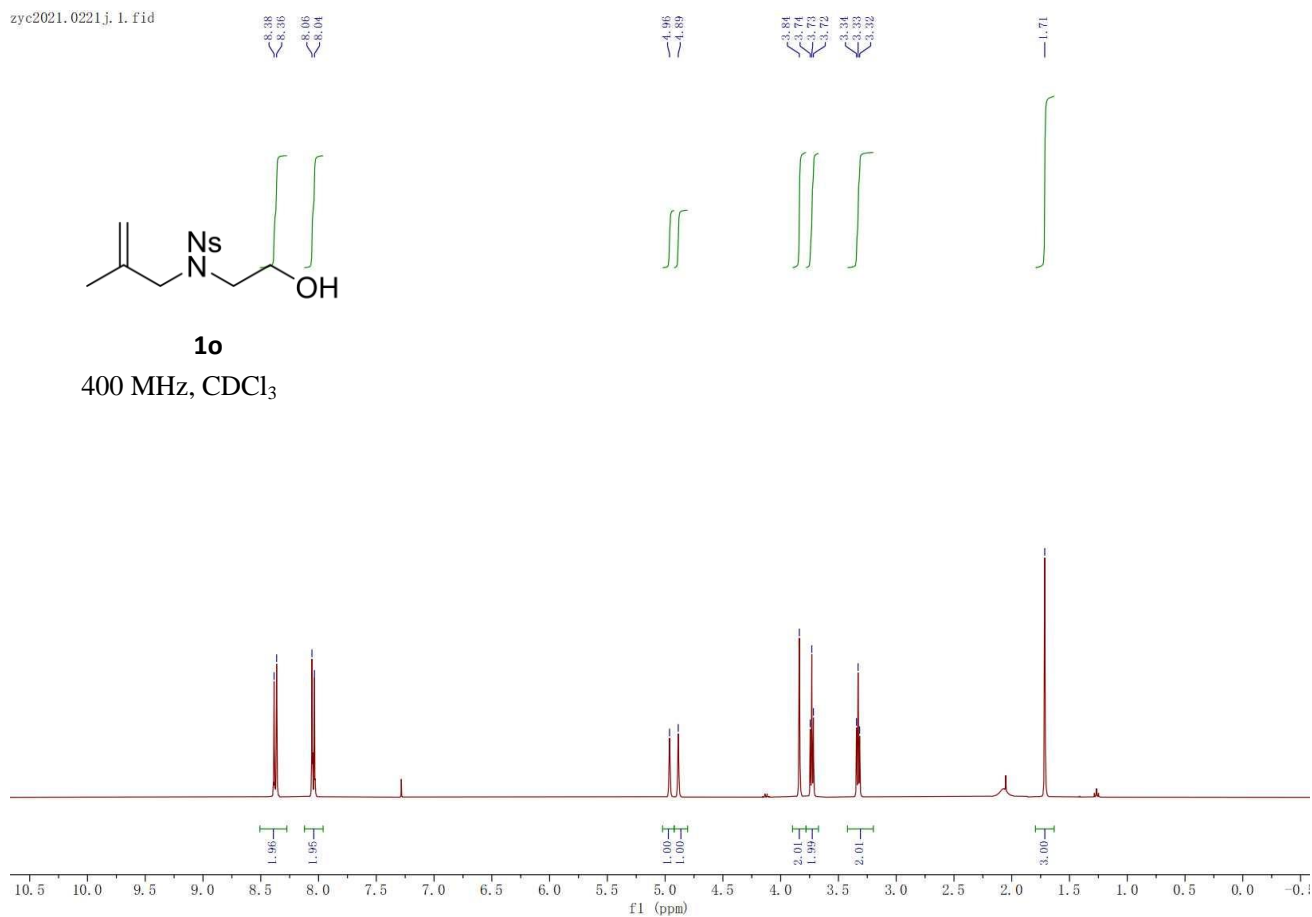

zyc2021.0221j.2.fid

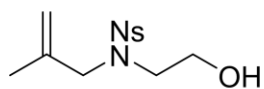

**1o**  
100 MHz, CDCl<sub>3</sub>

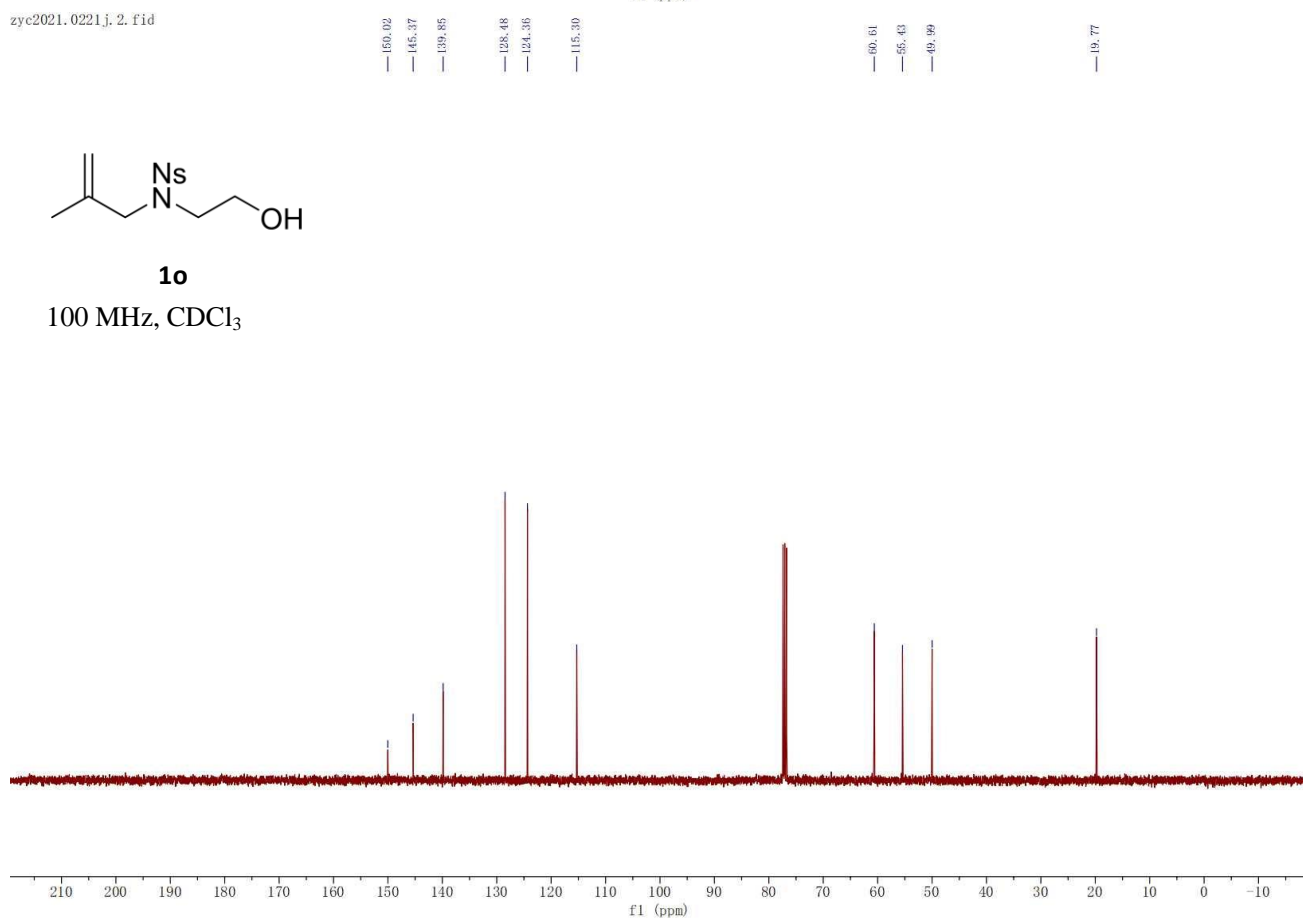



20220606DTB. 1. fid

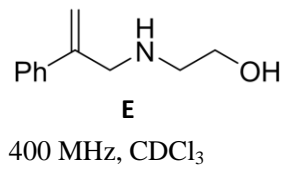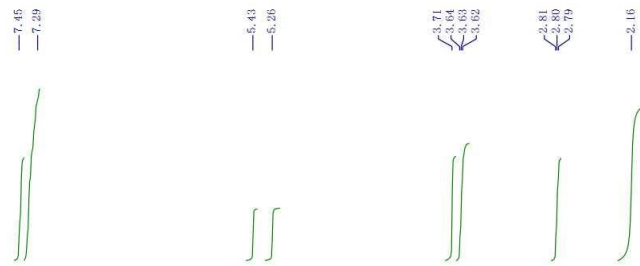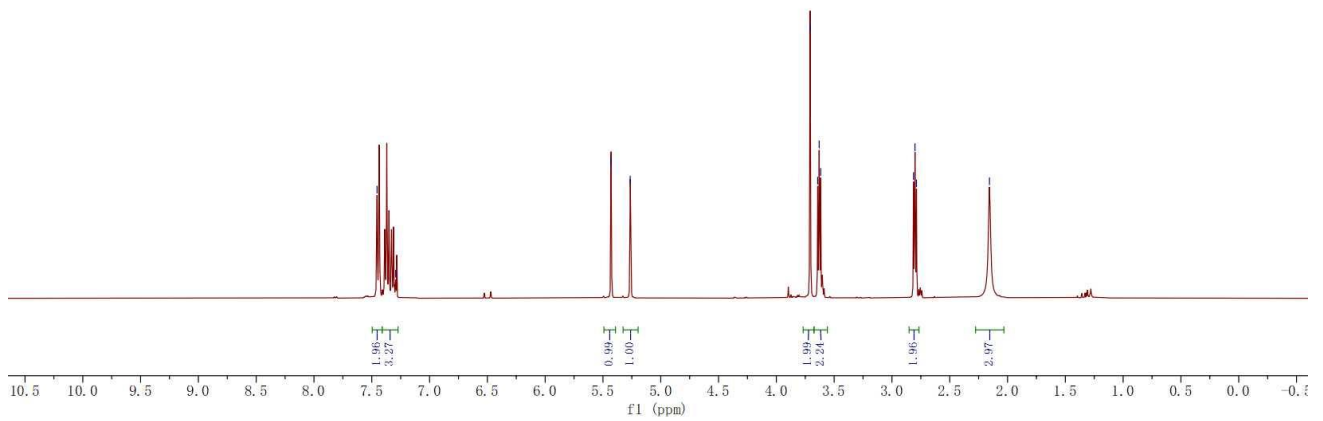

20220606DTB. 2. fid

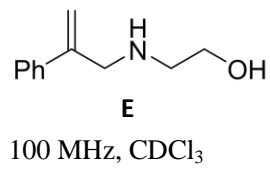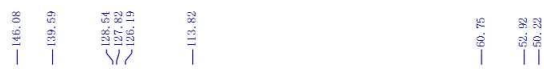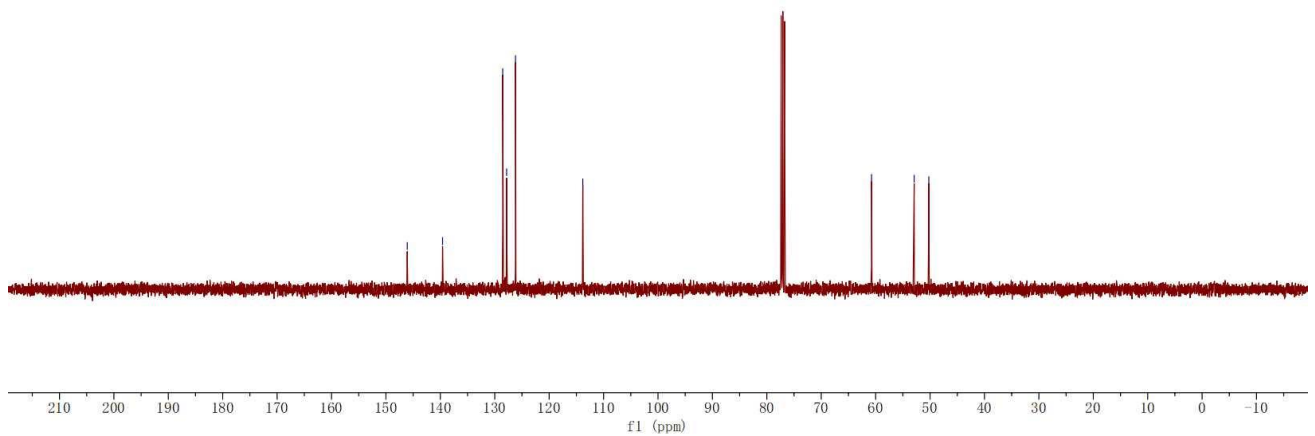

20220603JXJ-0.1.fid

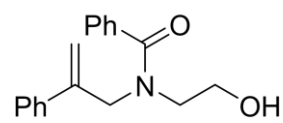

**1p**

400 MHz, CDCl<sub>3</sub>

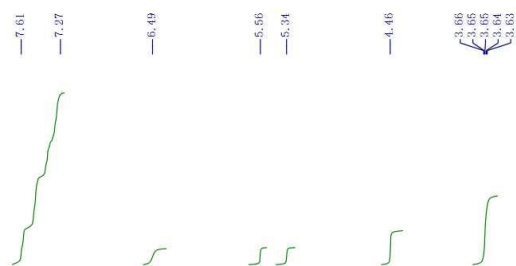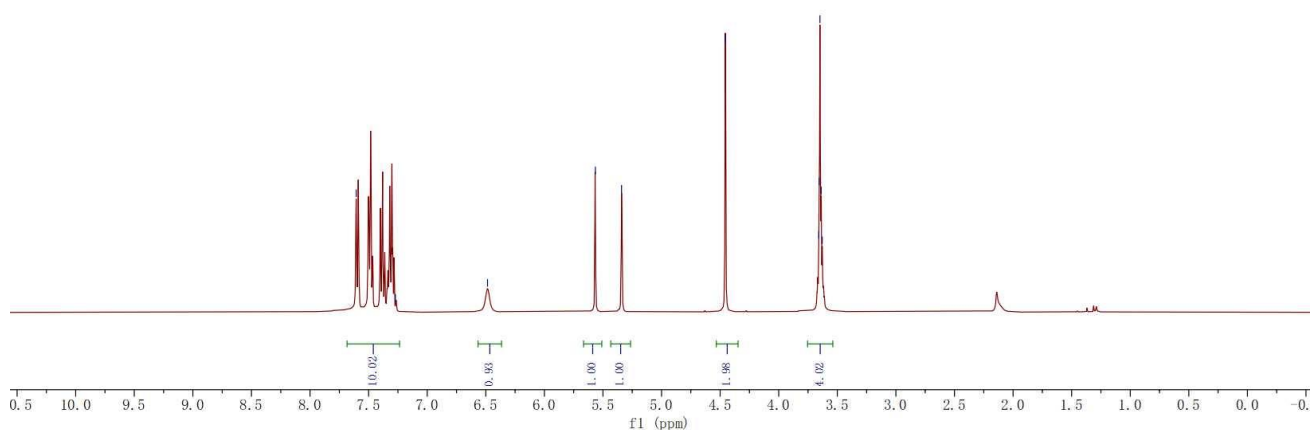

20220603JXJ-0.2.fid

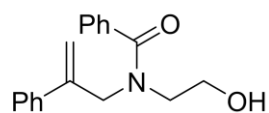

**1p**

100 MHz, CDCl<sub>3</sub>

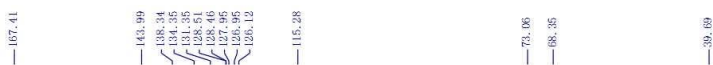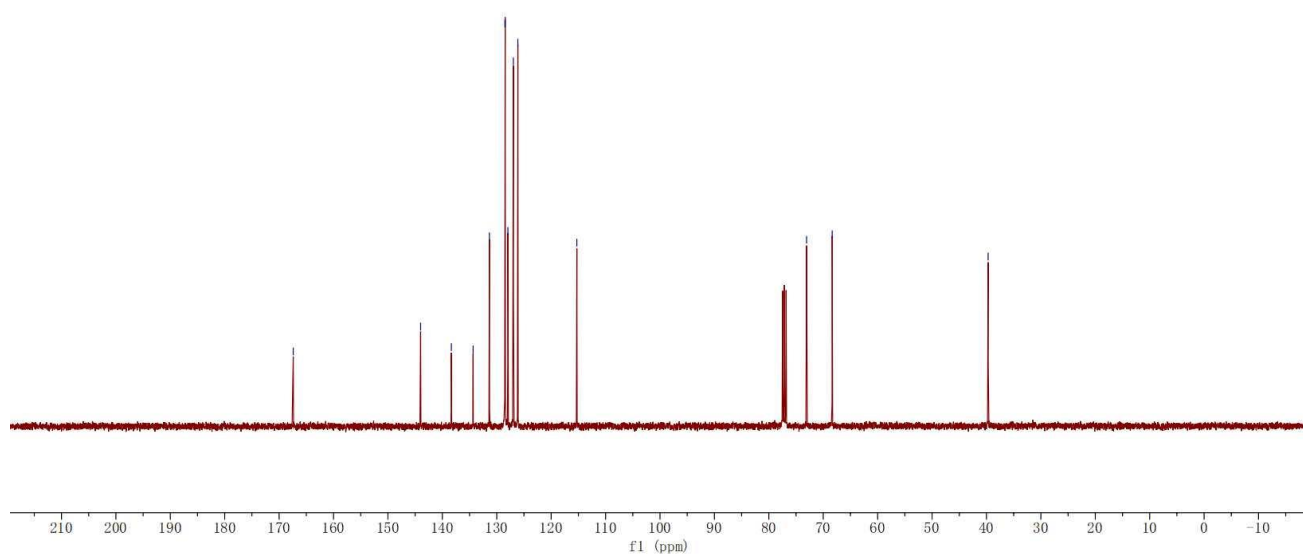

20220615DTB. 1. fid

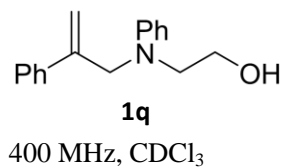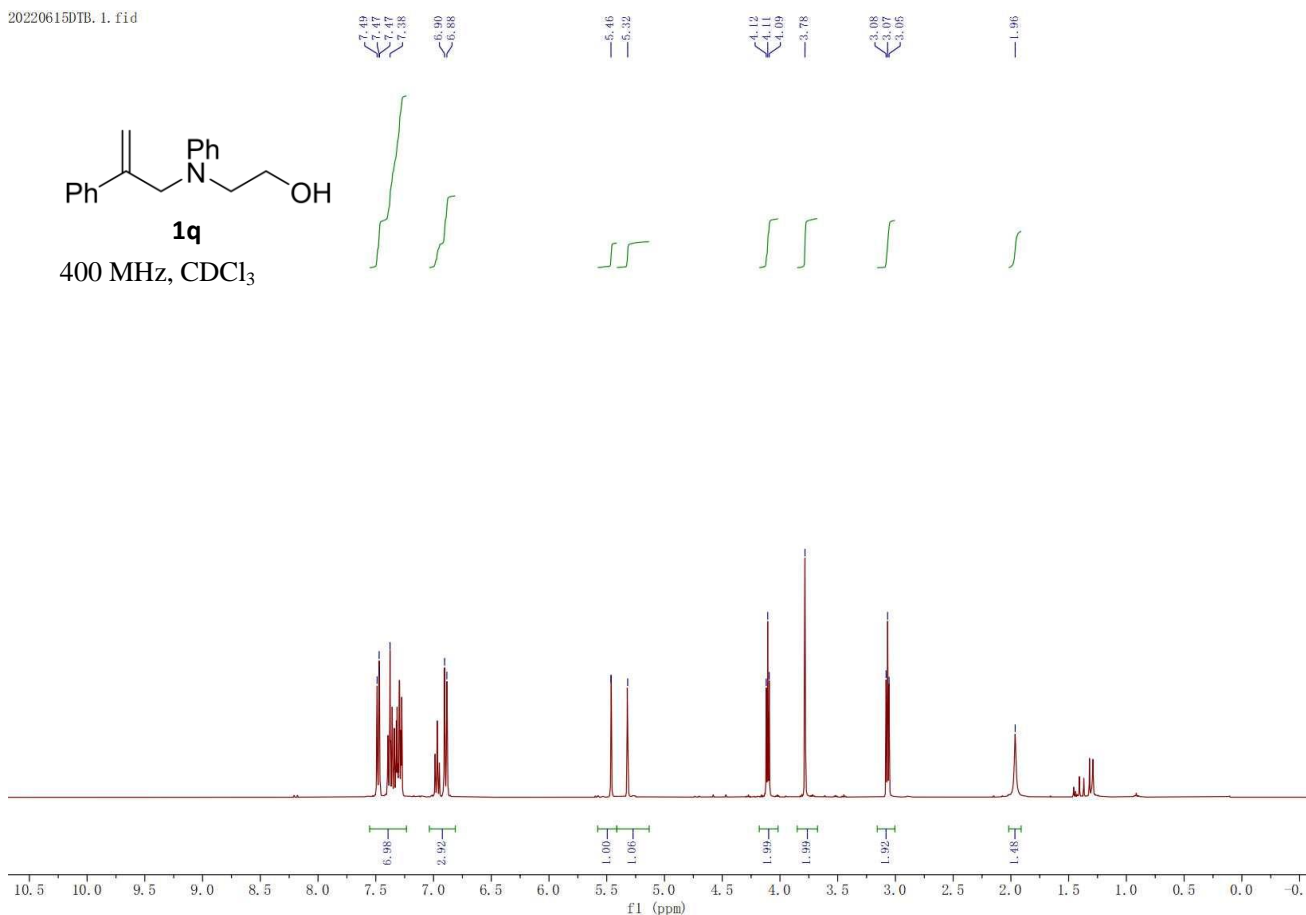

20220615DTB. 2. fid

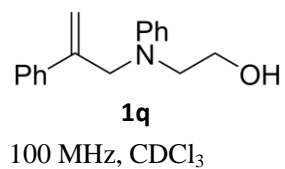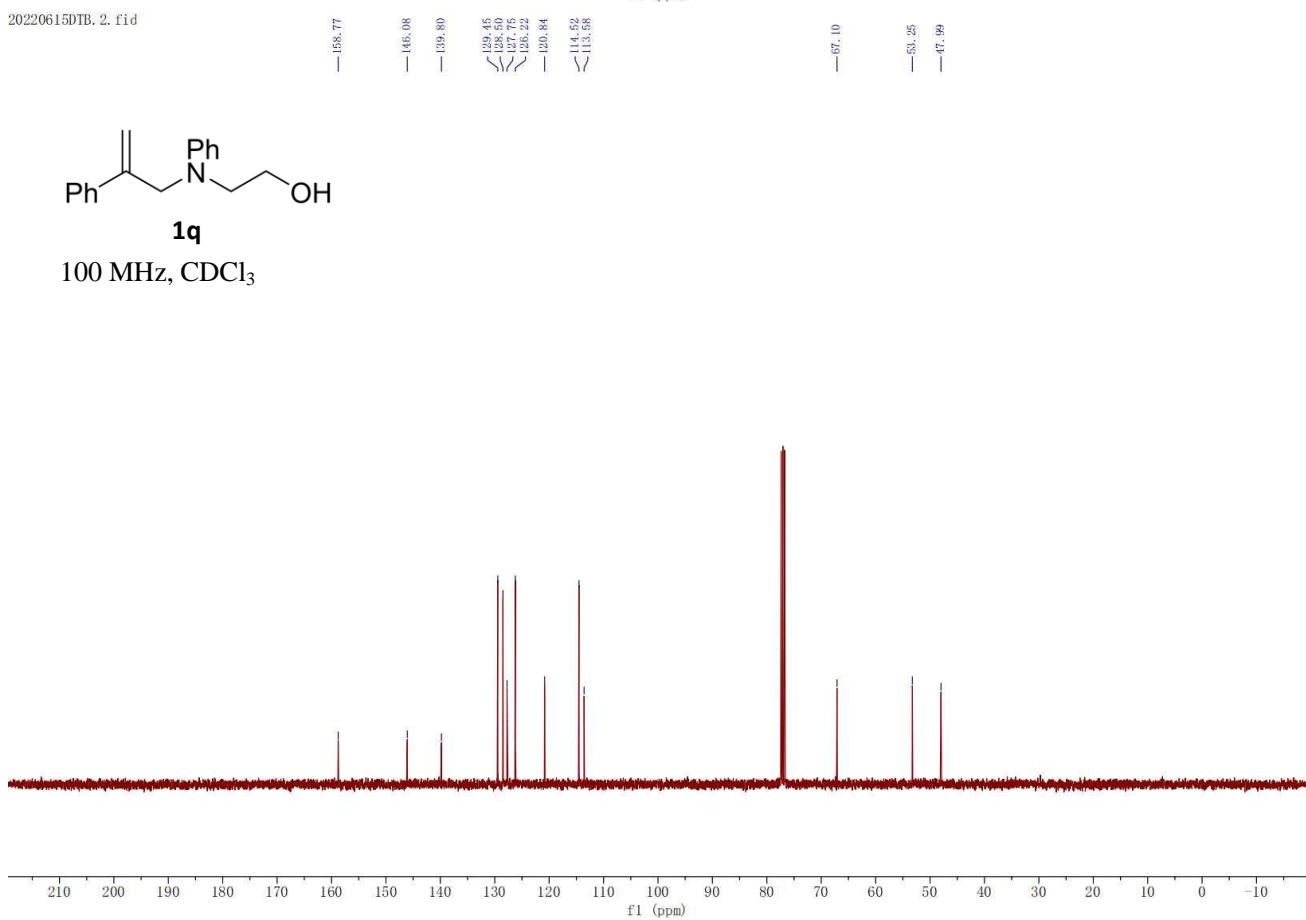

JXJ2021.0219B. 1. fid

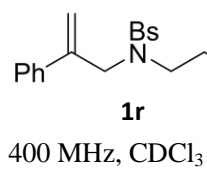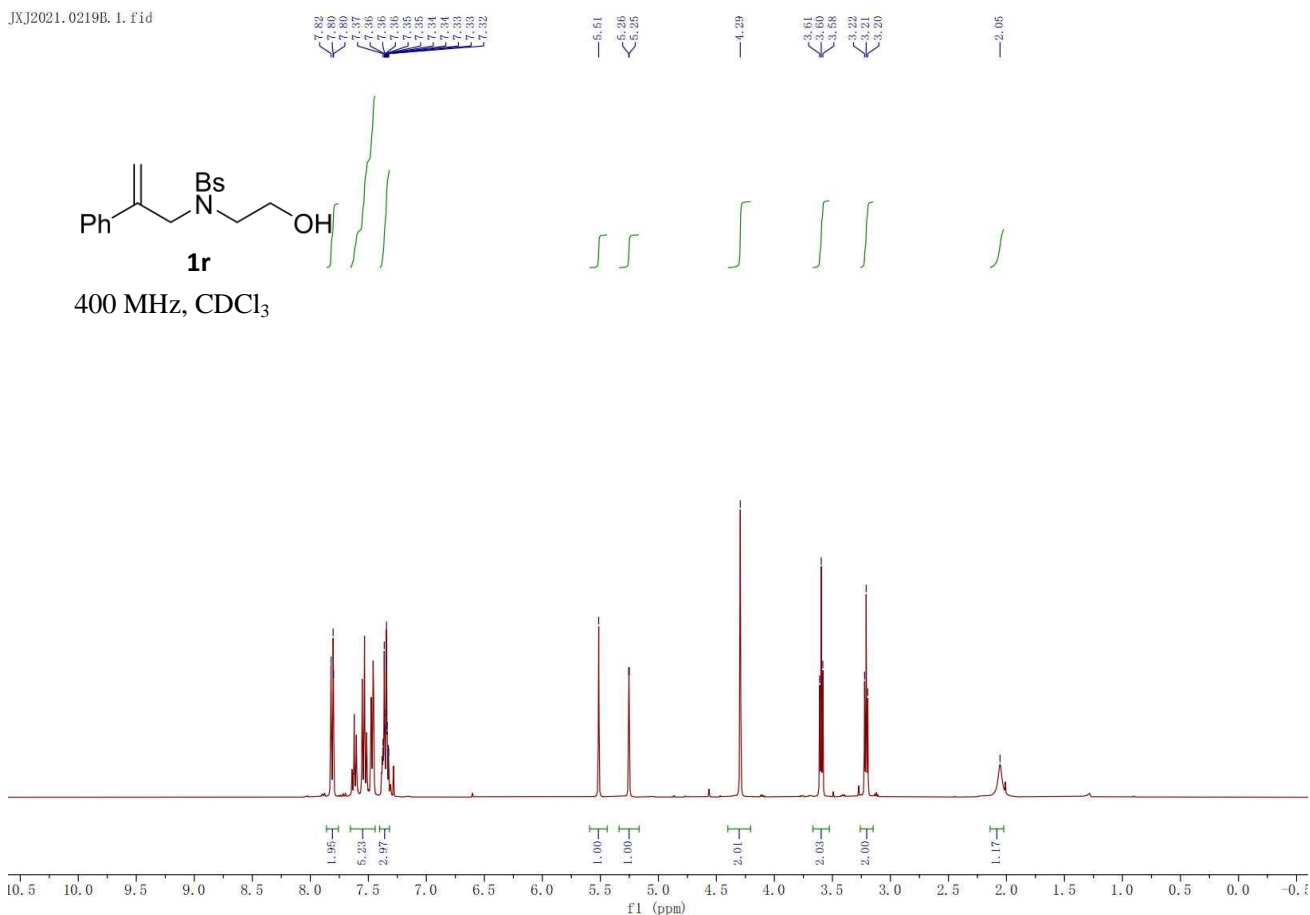

JXJ2021.0219B. 2. fid

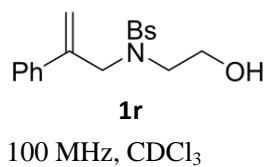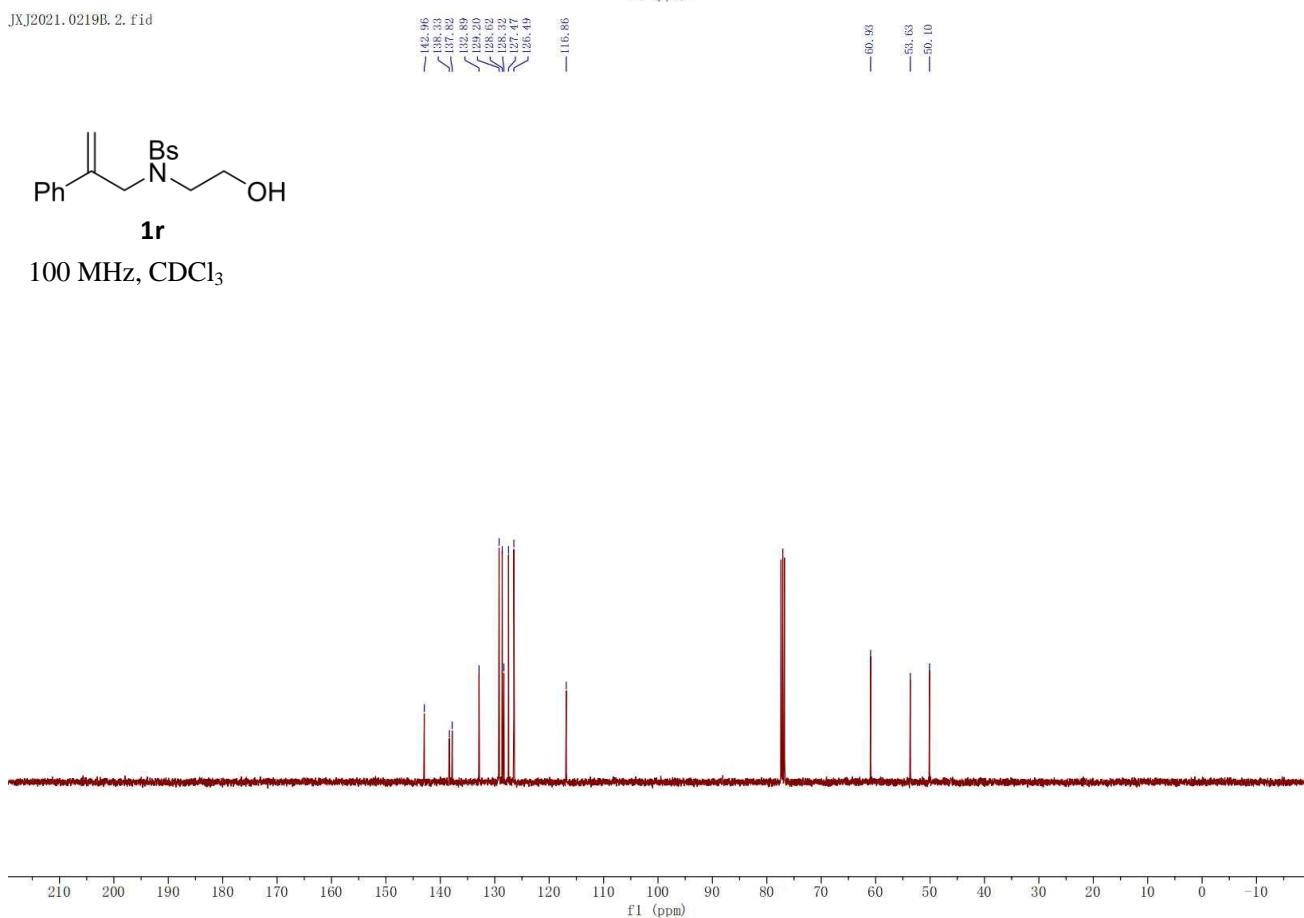

gm2021. 4. 2b. 1. fid

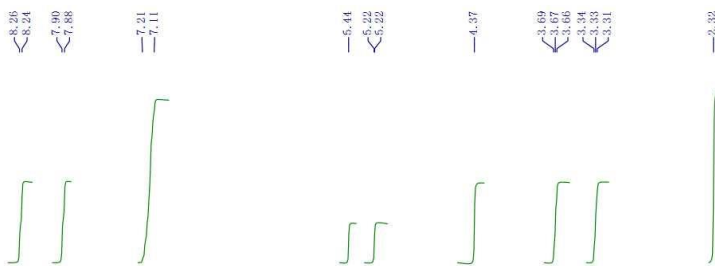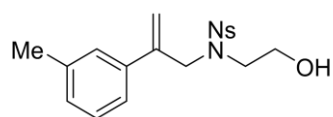

**1s**

400 MHz, CDCl<sub>3</sub>

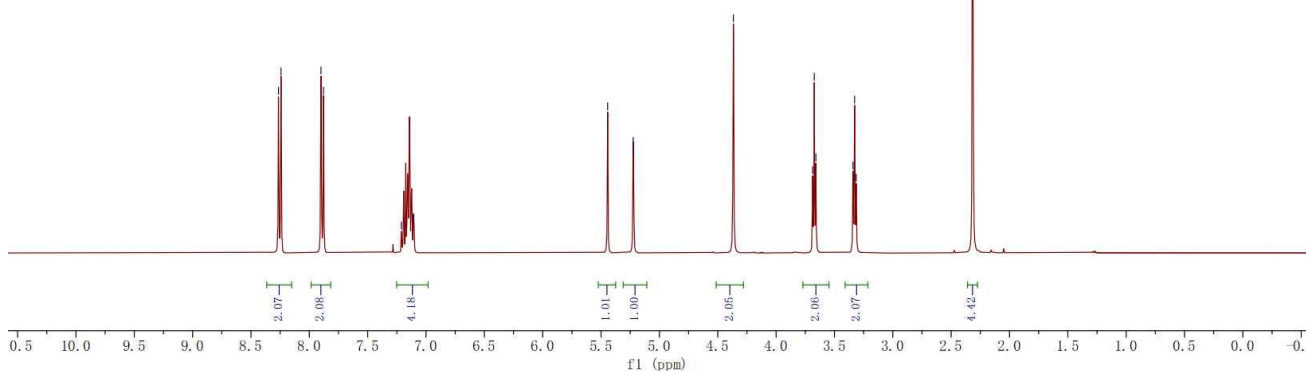

gm2021. 4. 2b. 2. fid

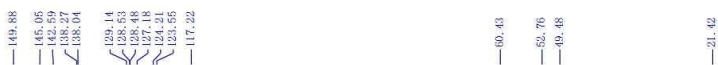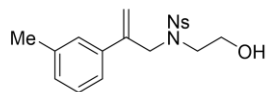

**1s**

100 MHz, CDCl<sub>3</sub>

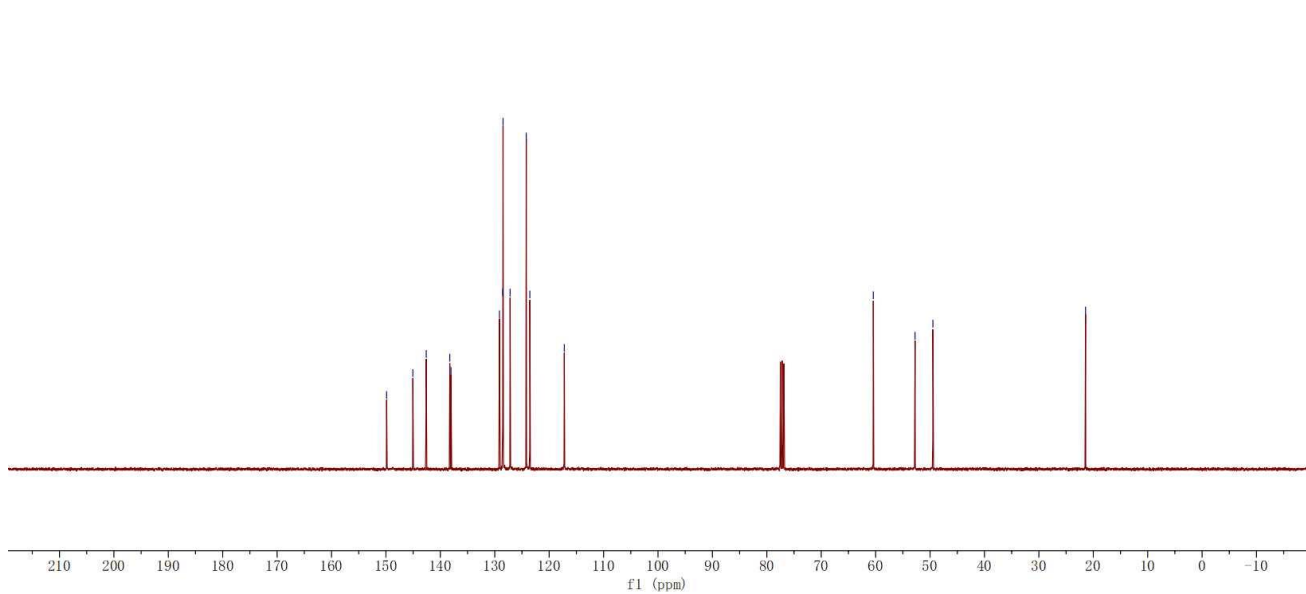

GM. 2021.3.23B. 1. fid  
H

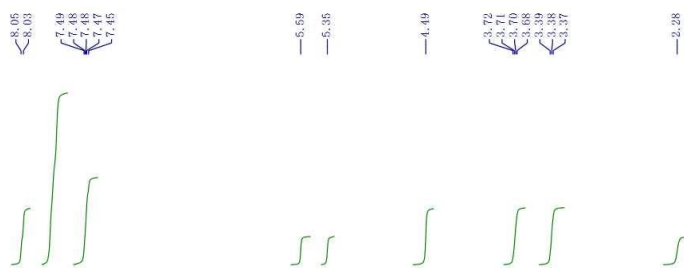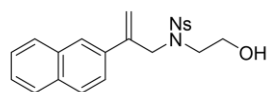

**1t**

400 MHz, CDCl<sub>3</sub>

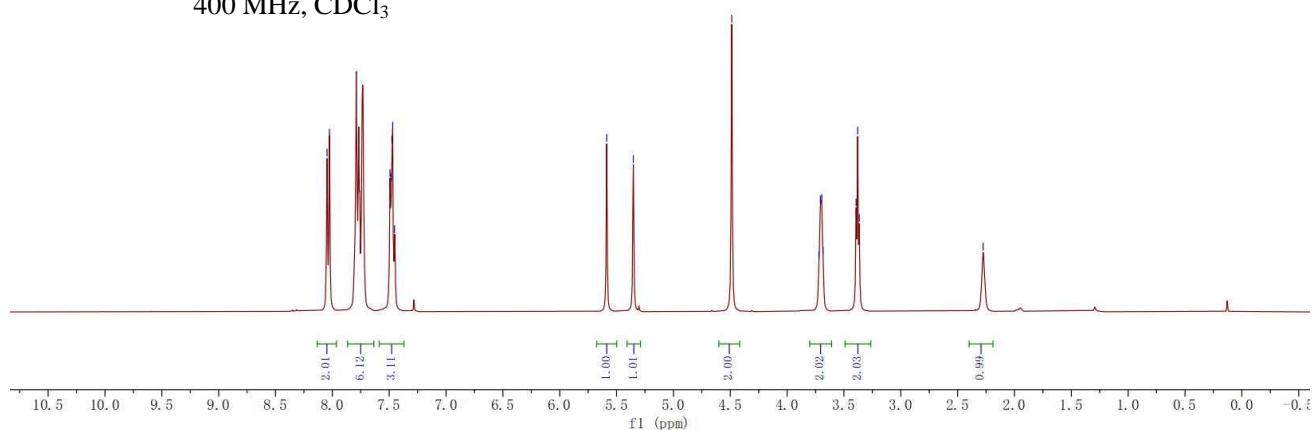

GM. 2021.3.23A. 2. fid  
H

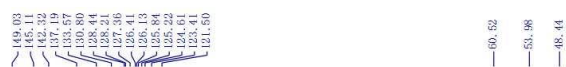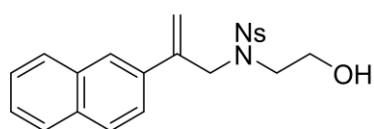

**1t**

100 MHz, CDCl<sub>3</sub>

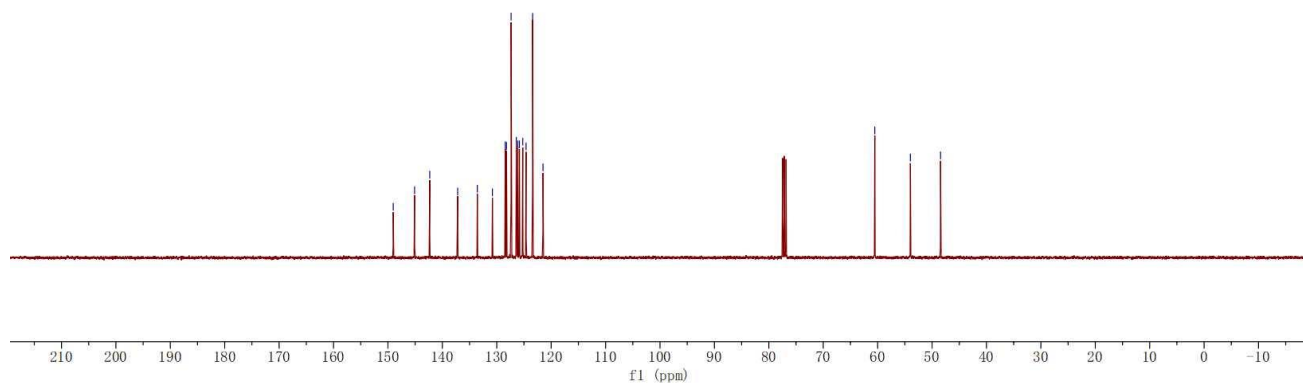

JXJ2021.0123K.1.fid

8.25  
8.23  
7.69  
7.66  
7.29  
7.22  
5.39  
5.39  
5.18  
5.18  
4.52  
4.51

3.30

1.27

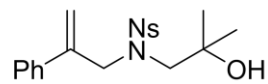

**1u**

400 MHz, CDCl<sub>3</sub>

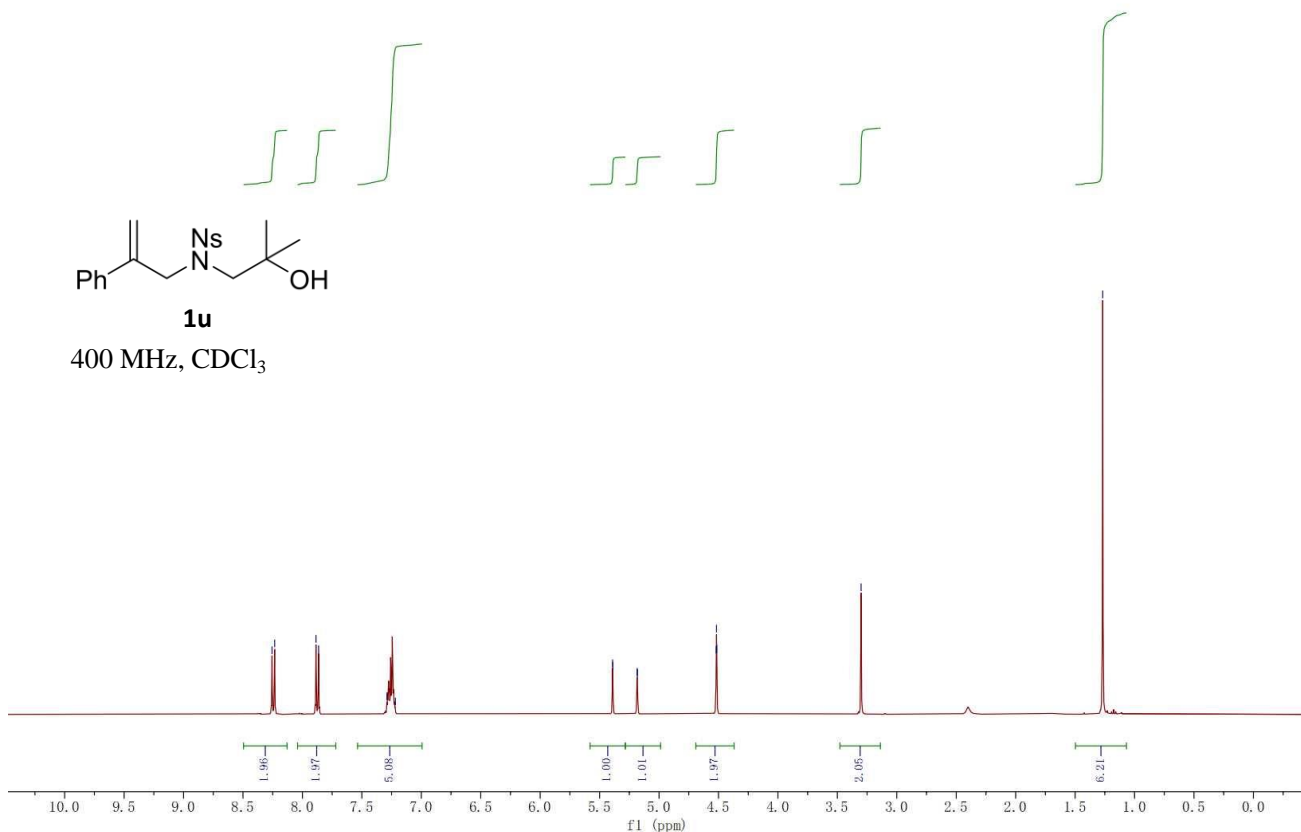

JXJ2021.0123K.2.fid

149.86  
145.33  
142.72  
136.74  
128.59  
128.52  
128.32  
126.47  
124.10  
117.46

71.80

68.11

53.78

27.90

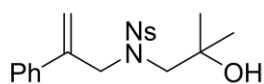

**1u**

100 MHz, CDCl<sub>3</sub>

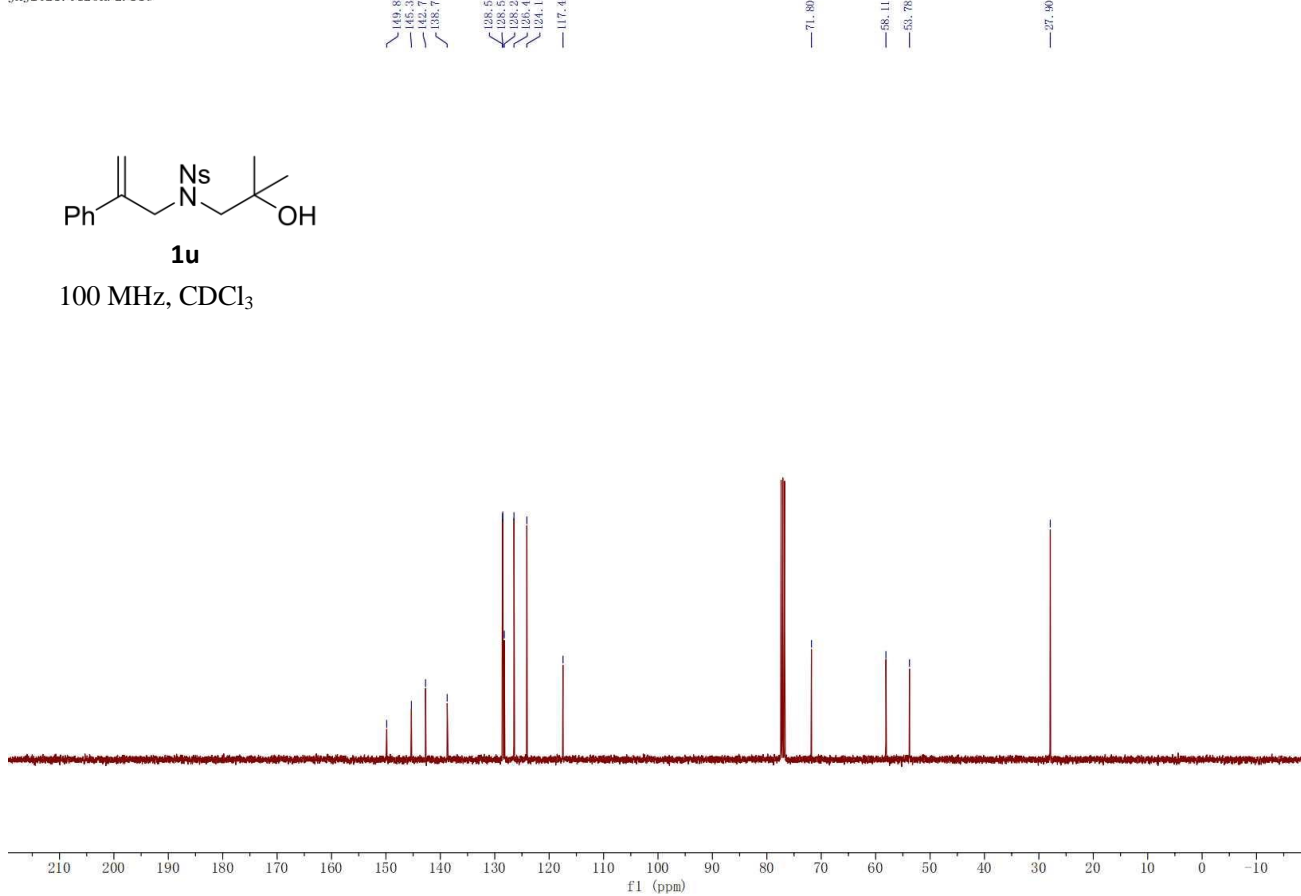

jx\_j2021.0221o.1.fid

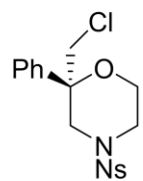

**2a**  
400 MHz, CDCl<sub>3</sub>

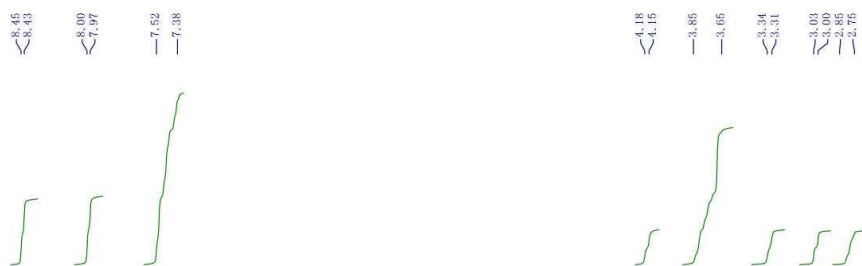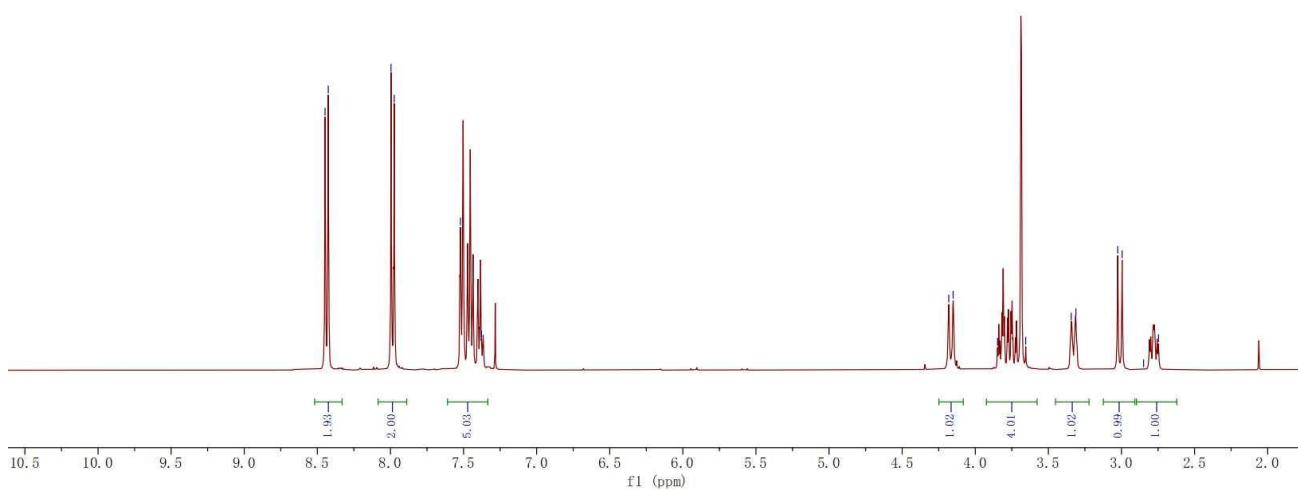

jx\_j2021.0221o.2.fid

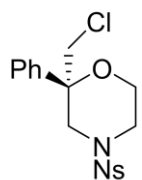

**2a**  
100 MHz, CDCl<sub>3</sub>

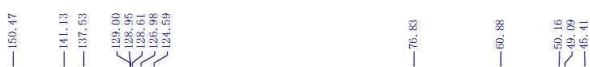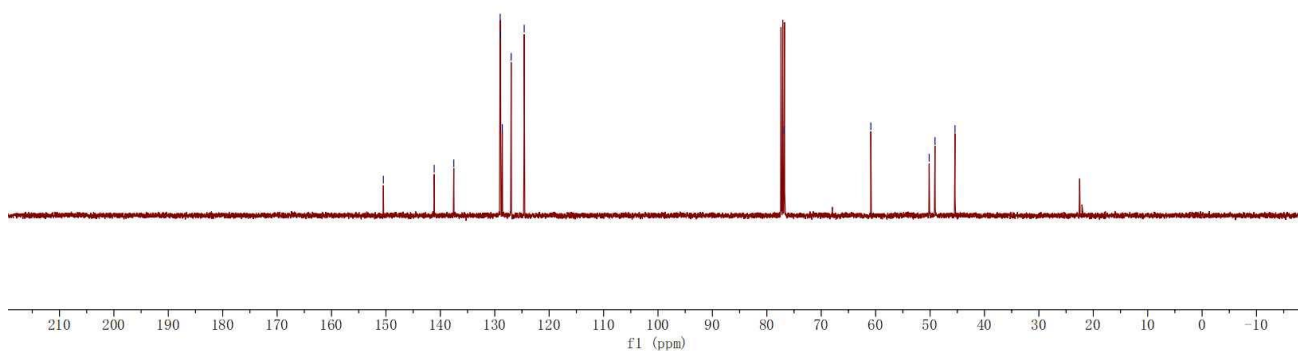



ixj. 2021. 08. 30. A. 1. fid

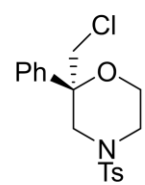

**2b**

400 MHz, CDCl<sub>3</sub>

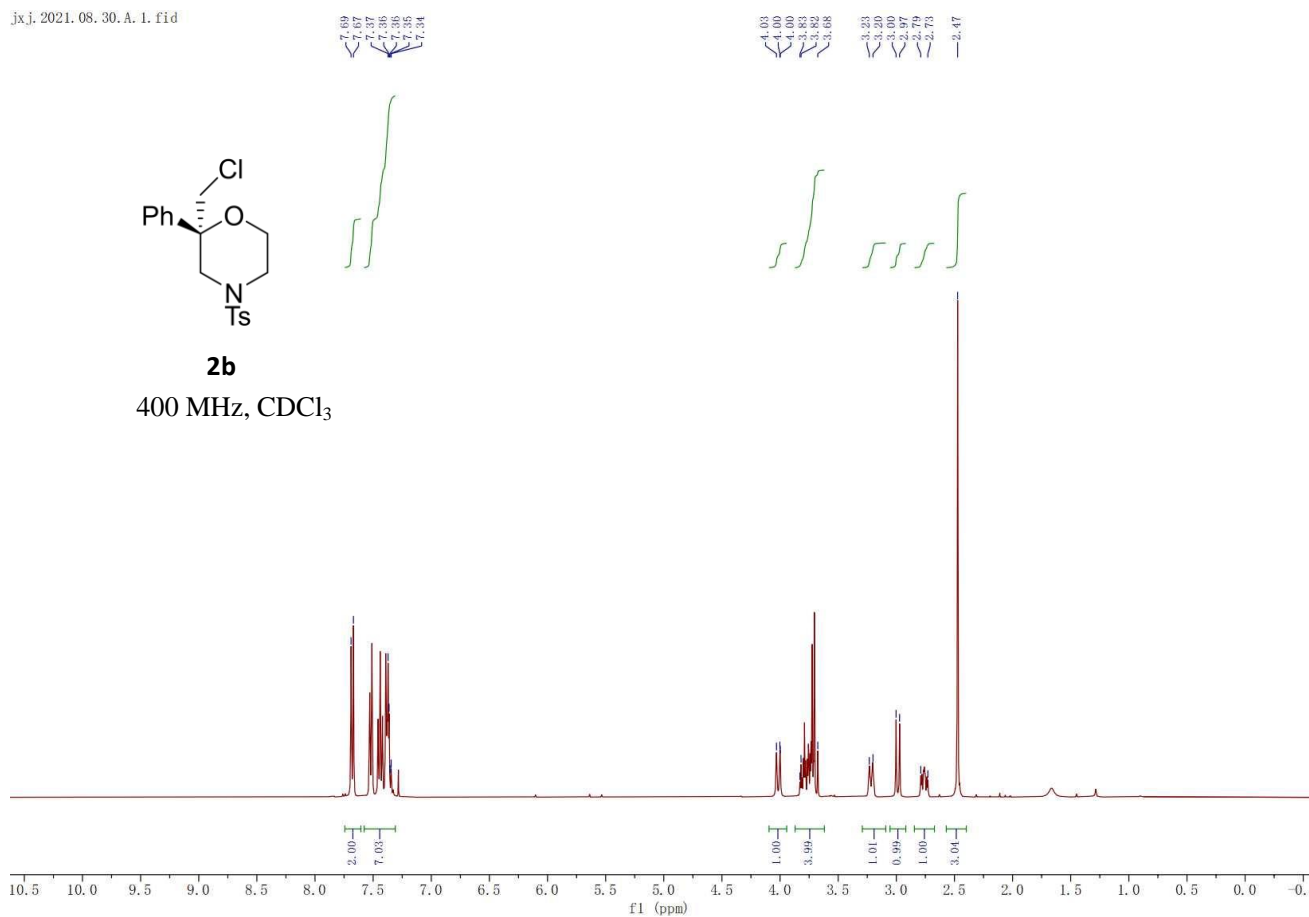

ixj. 2021. 08. 30. A. 2. fid

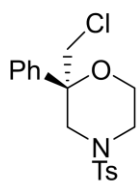

**2b**

100 MHz, CDCl<sub>3</sub>

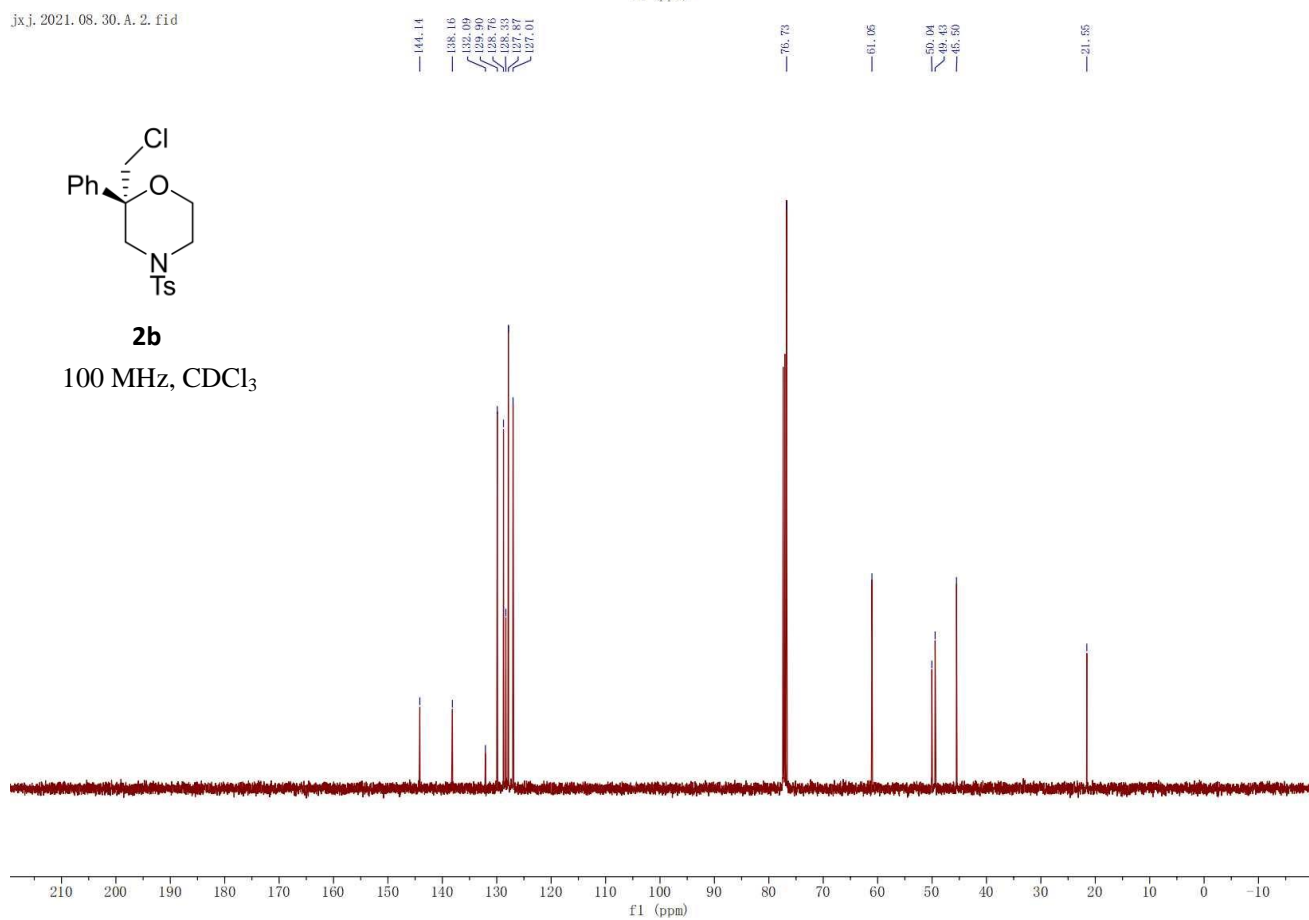

jxj2021.1125c.1.fid  
1

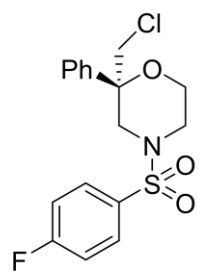

**2c**  
400 MHz, CDCl<sub>3</sub>

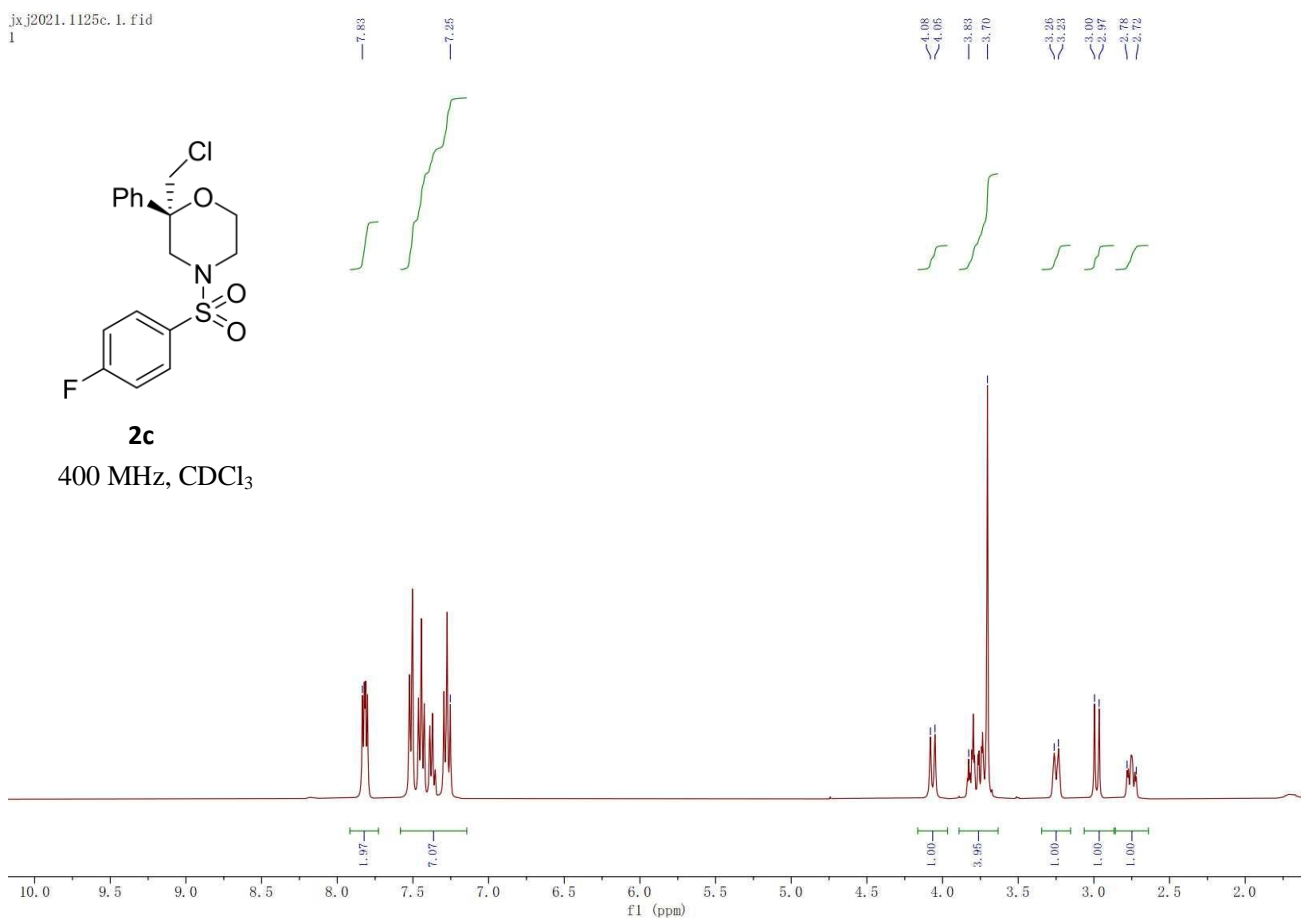

JXJ2021.1209C.2.fid  
1

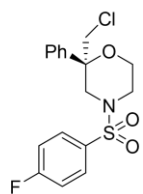

**2c**  
100 MHz, CDCl<sub>3</sub>

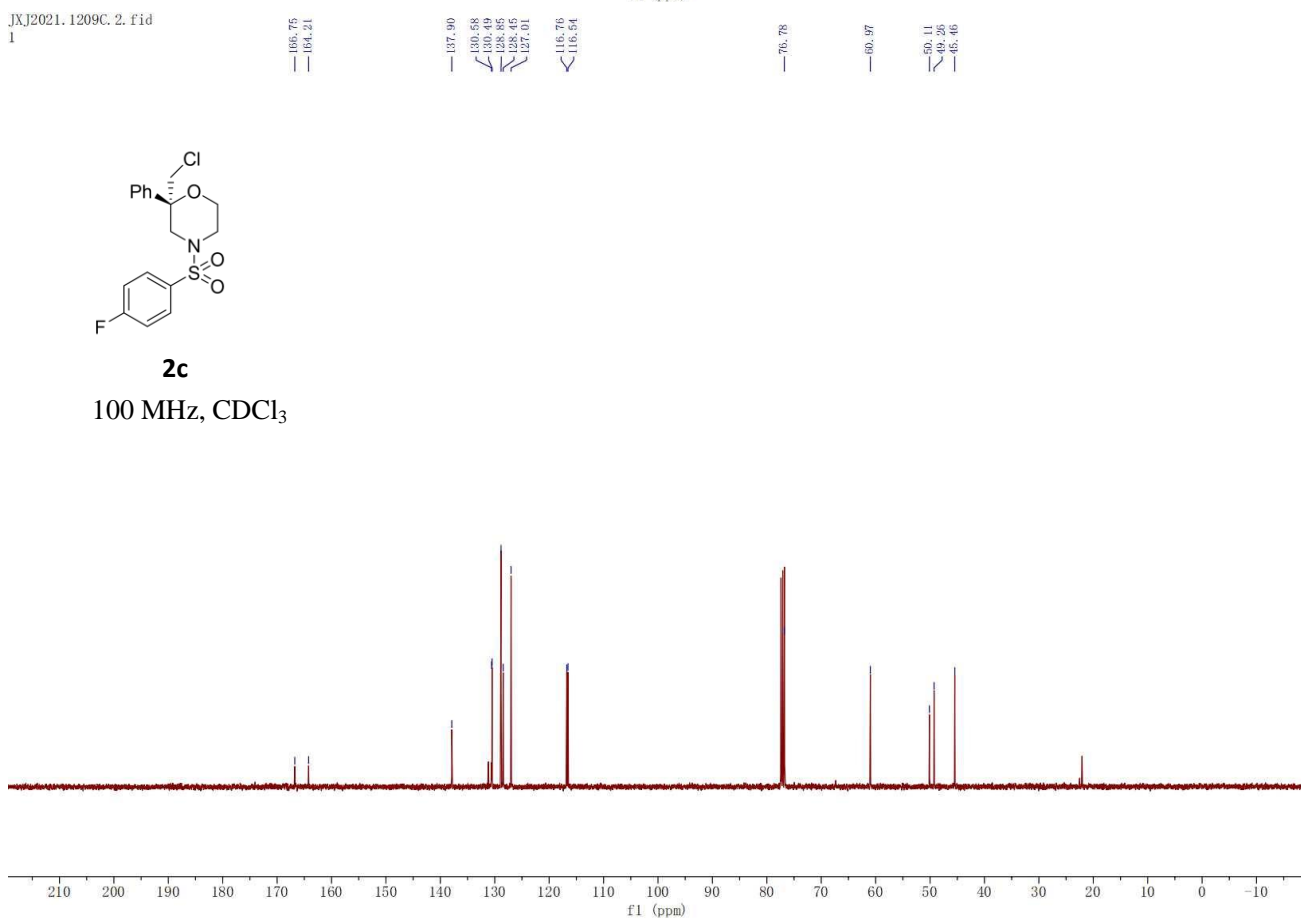

JXJ2021.1106E.1.fid  
1

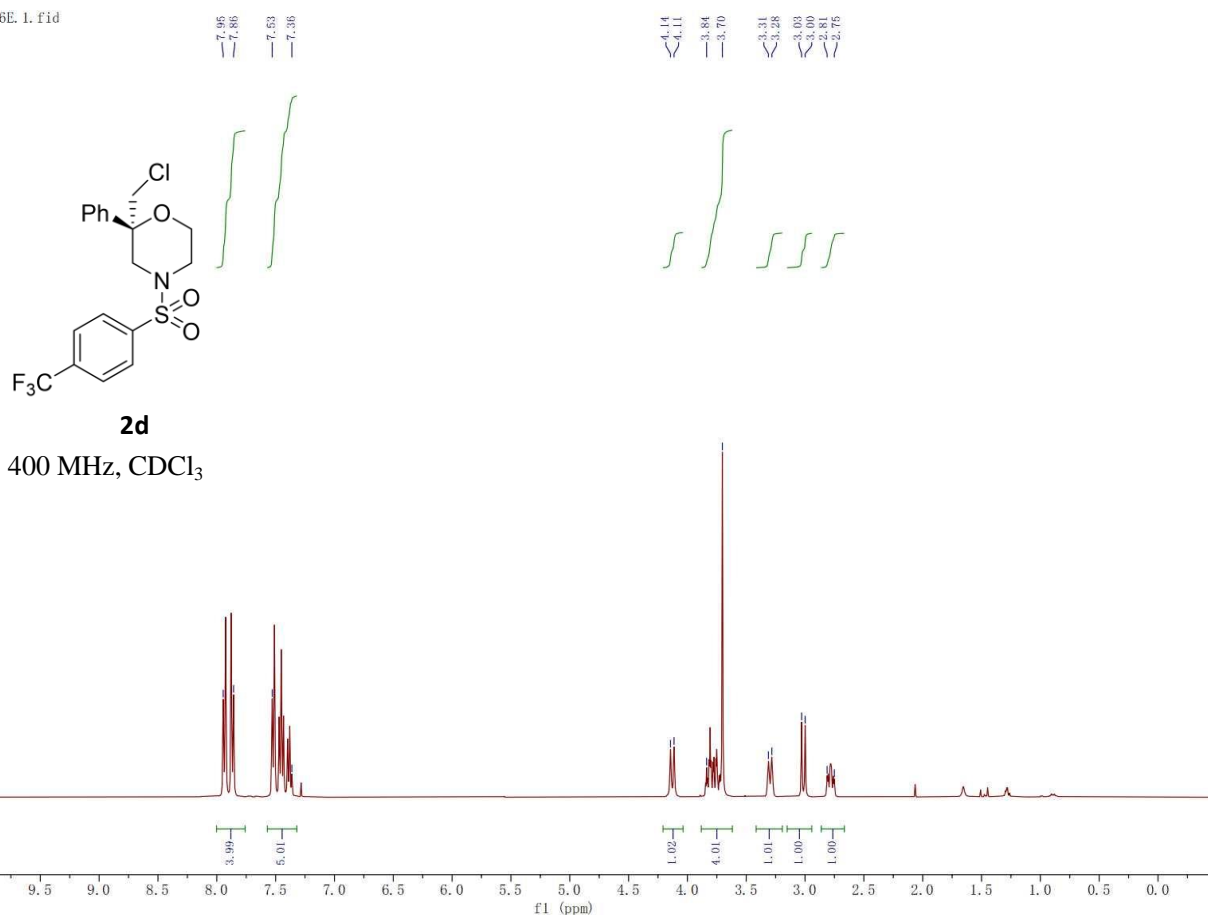

JXJ2021.1106E.2.fid  
1

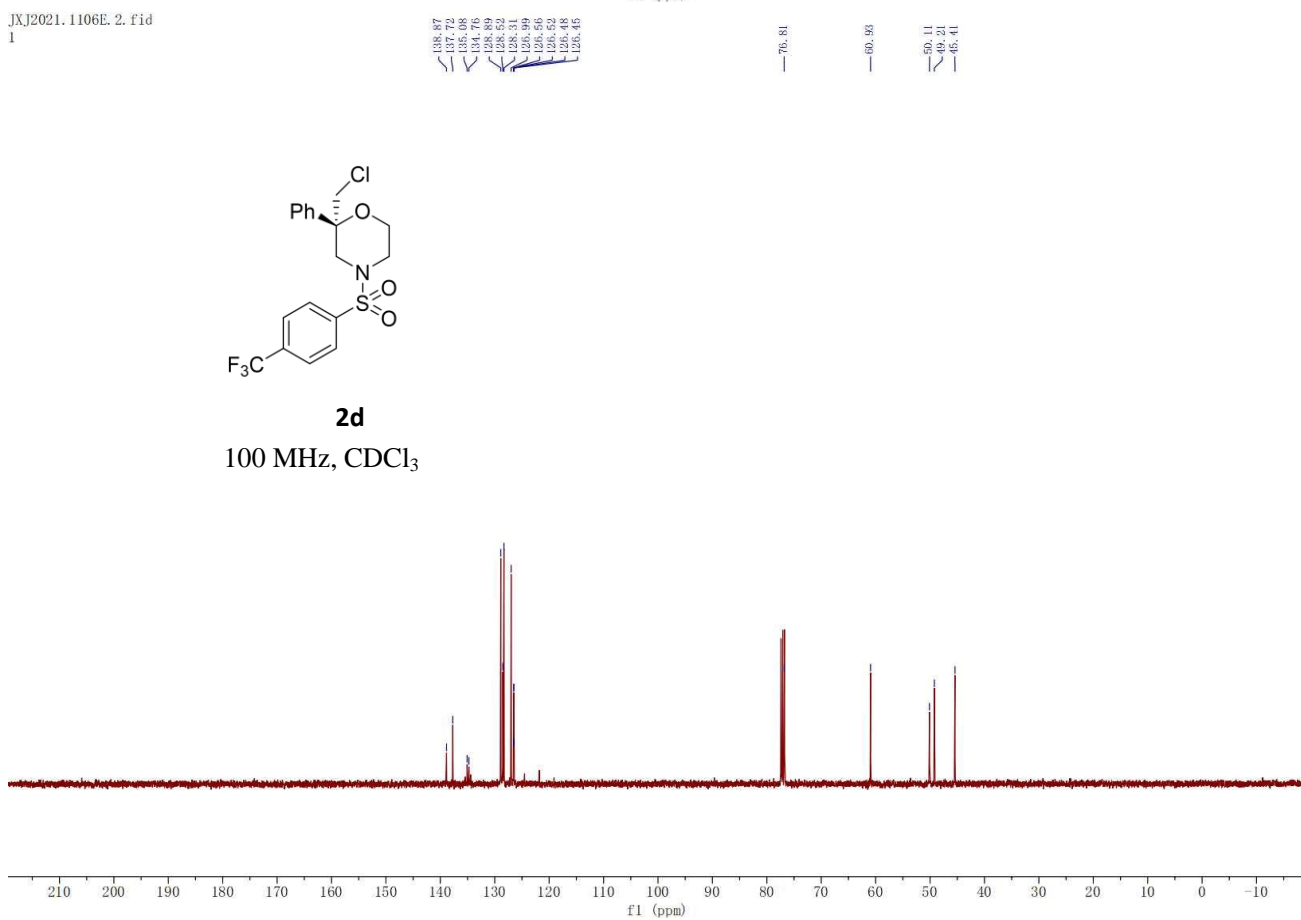

ixj2021.0815d.1.fid  
1

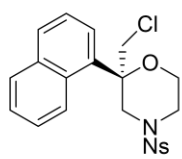

**2e**

400 MHz, CDCl<sub>3</sub>

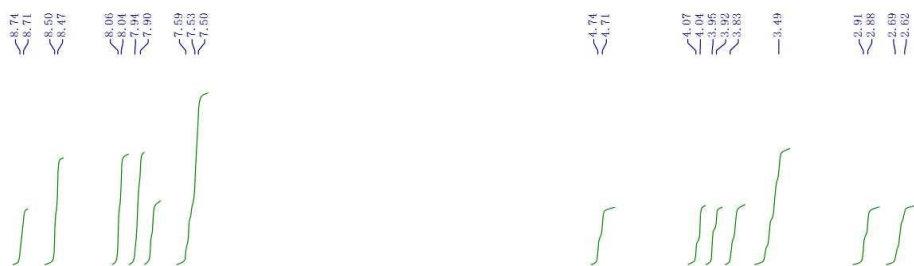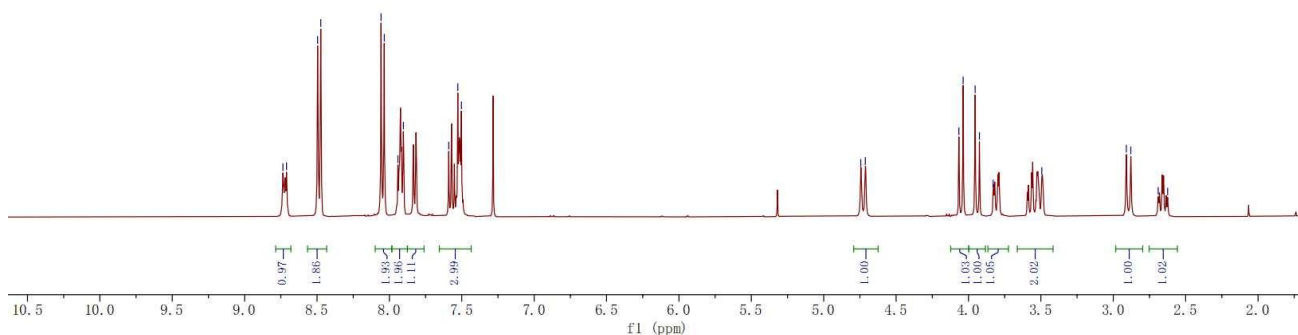

ixj.2021.08.30.h.2.fid

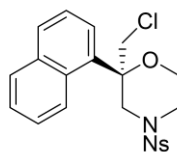

**2e**

100 MHz, CDCl<sub>3</sub>

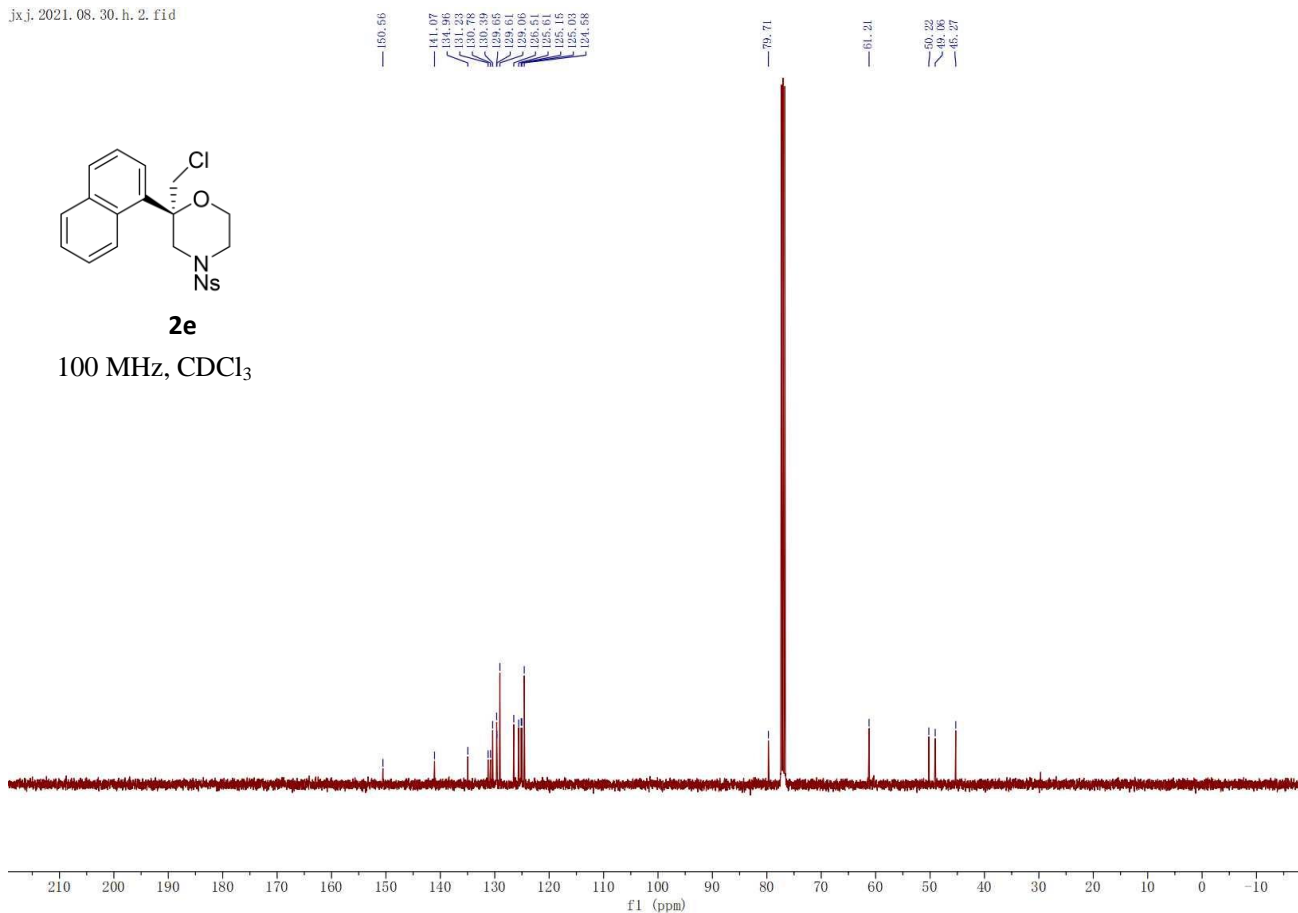

ixj\_2021.09.03.e.1.fid

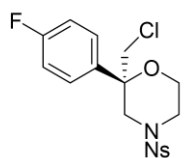

**2f**

400 MHz, CDCl<sub>3</sub>

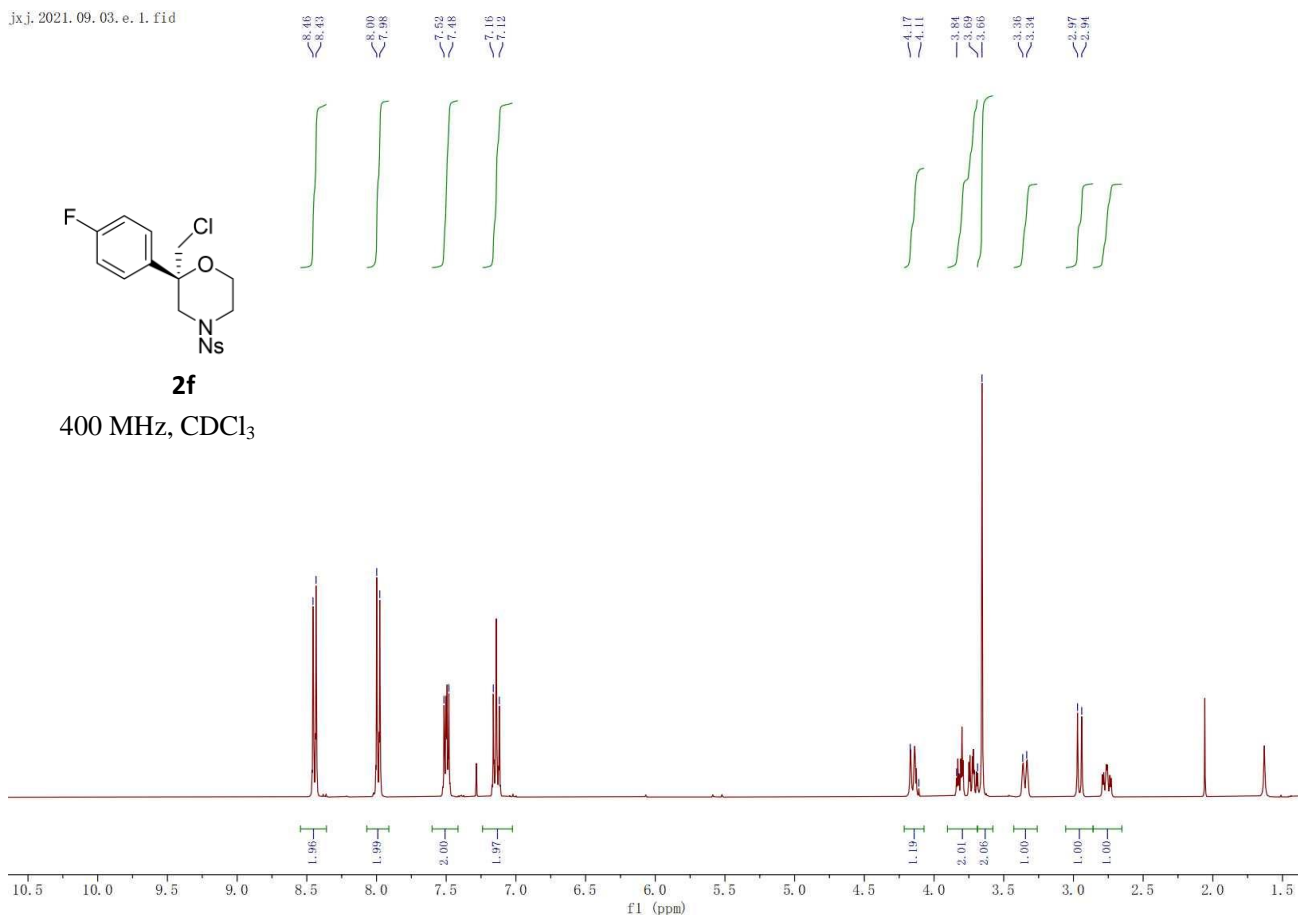

ixj\_2021.09.03.e.2.fid

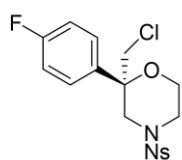

**2f**

100 MHz, CDCl<sub>3</sub>

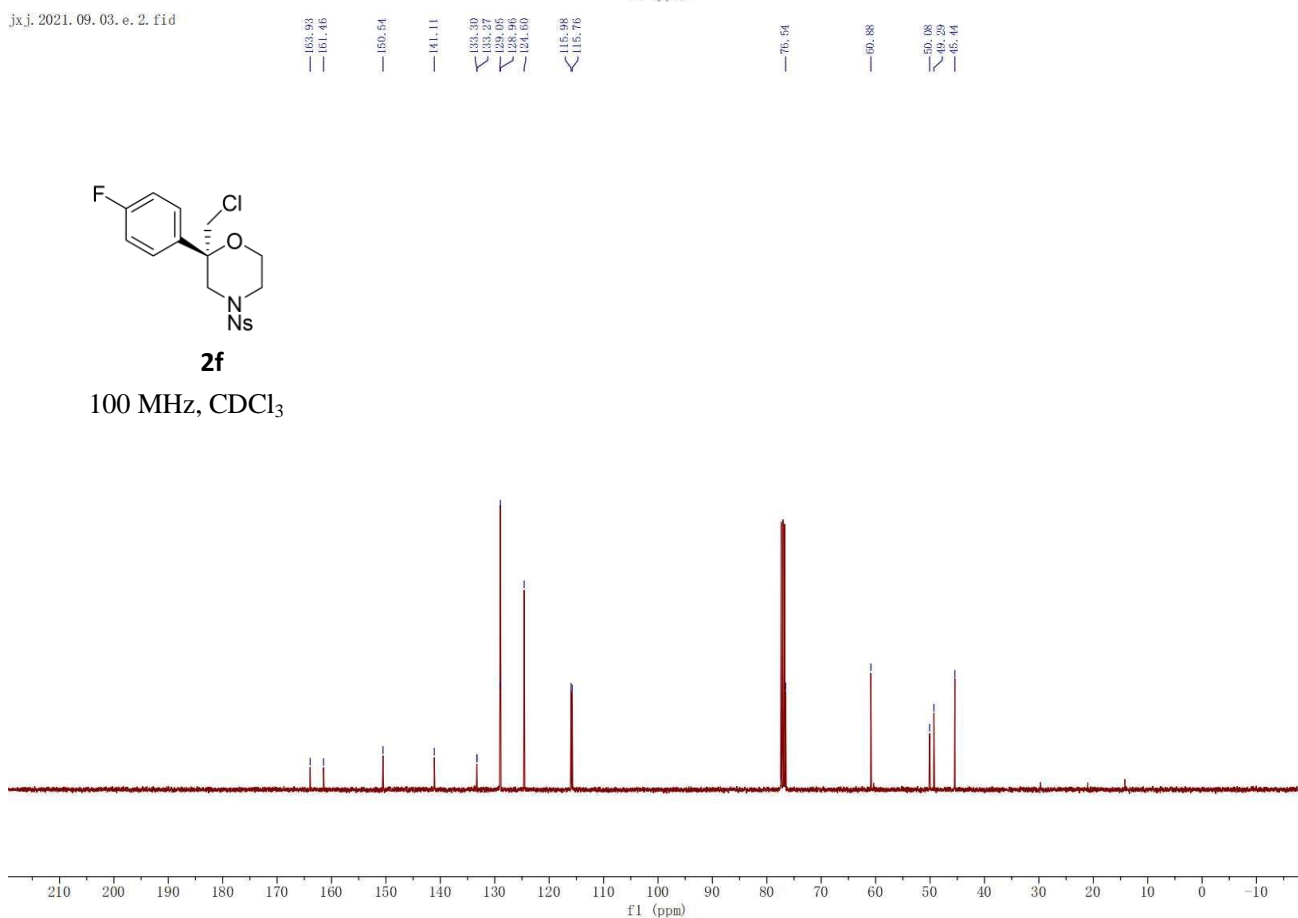

JXJ2021.0923D.5.fid

1

8.46  
8.44

8.09  
7.98

7.77  
7.72

4.17  
4.13

3.85  
3.65

3.37  
3.33

2.96  
2.93

2.79  
2.73

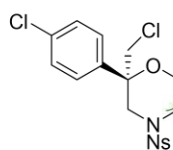

**2g**

400 MHz, CDCl<sub>3</sub>

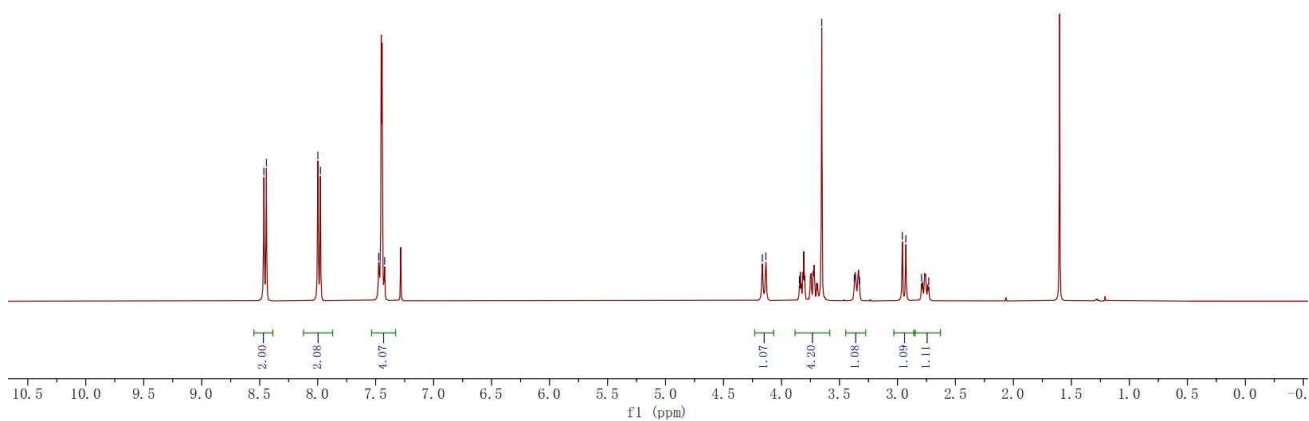

JXJ2021.0926d.2.fid

1

150.54

141.08

136.05

134.59

129.16

128.96

128.85

124.82

76.80

60.95

49.89

49.24

45.42

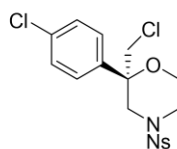

**2g**

100 MHz, CDCl<sub>3</sub>

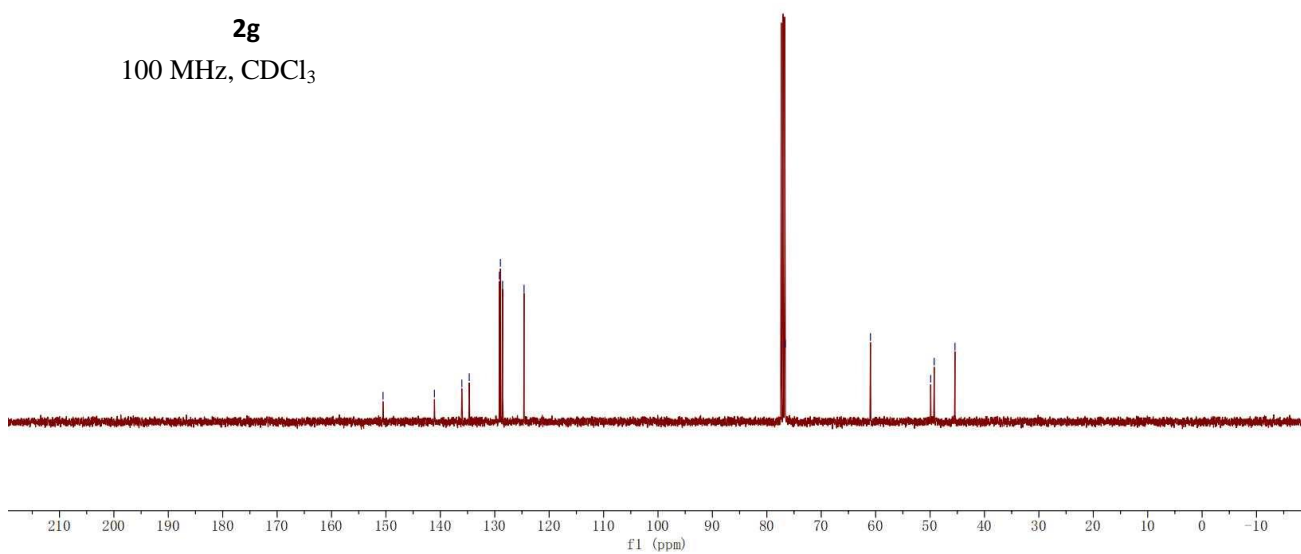

JXJ2021.0923C. 1. fid

1

8.46  
8.43  
7.99  
7.97  
7.60  
7.58  
7.56  
7.58  
4.16  
4.12  
3.84  
3.65  
3.36  
3.33  
2.96  
2.93  
2.79  
2.74

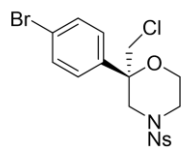

**2h**

400 MHz, CDCl<sub>3</sub>

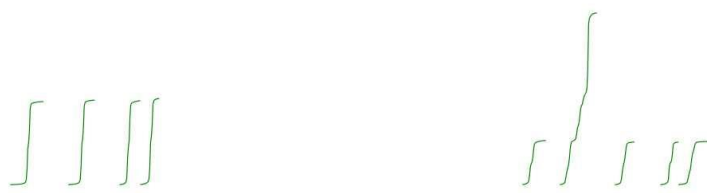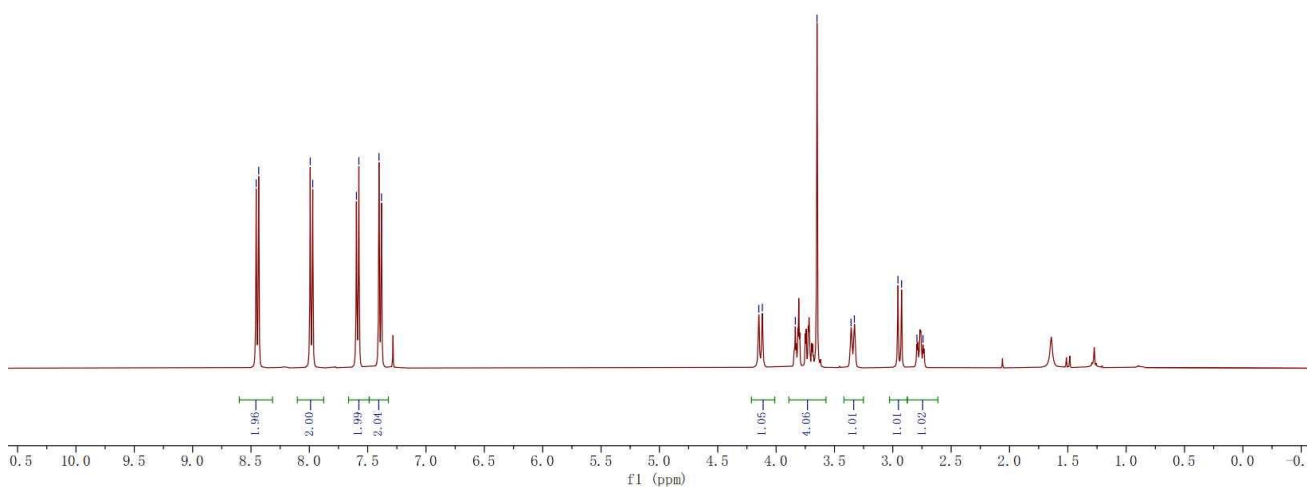

JXJ2021.0926c. 2. fid

1

150.52  
141.03  
138.02  
135.41  
133.88  
128.88  
124.83  
122.89  
60.97  
49.20  
46.42

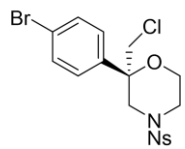

**2h**

100 MHz, CDCl<sub>3</sub>

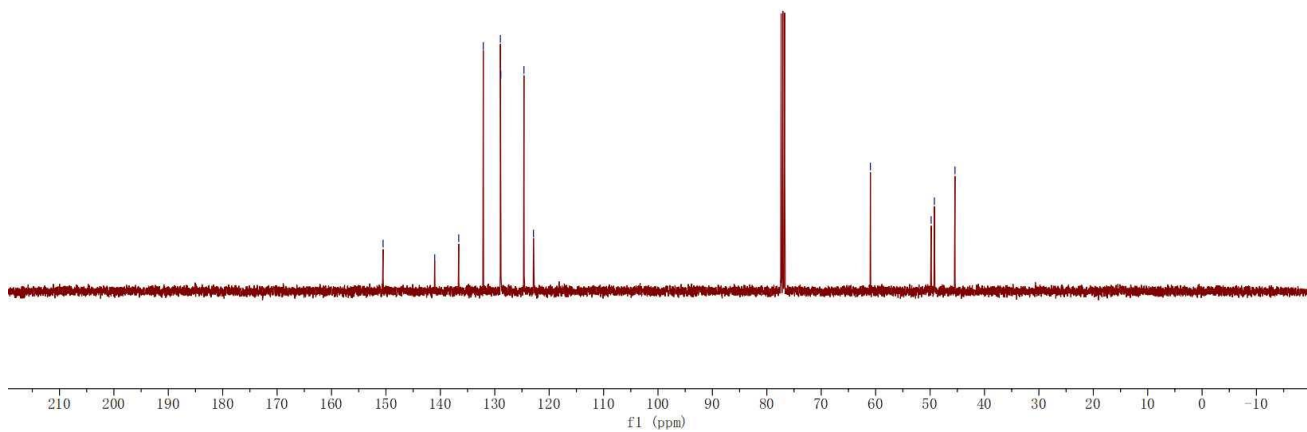

20211224JXJ-J. 1. fid

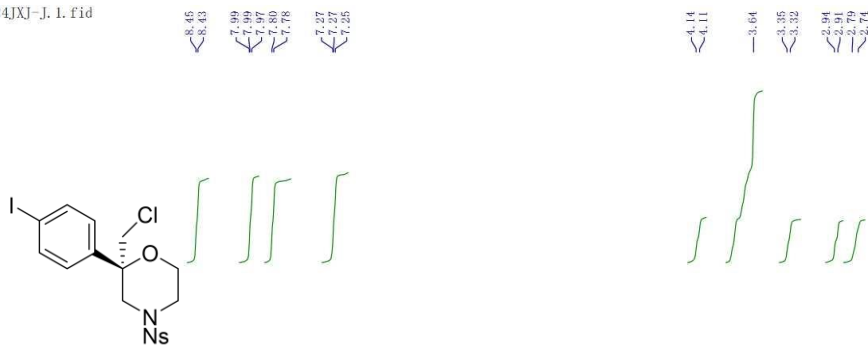

**2i**

400 MHz, CDCl<sub>3</sub>

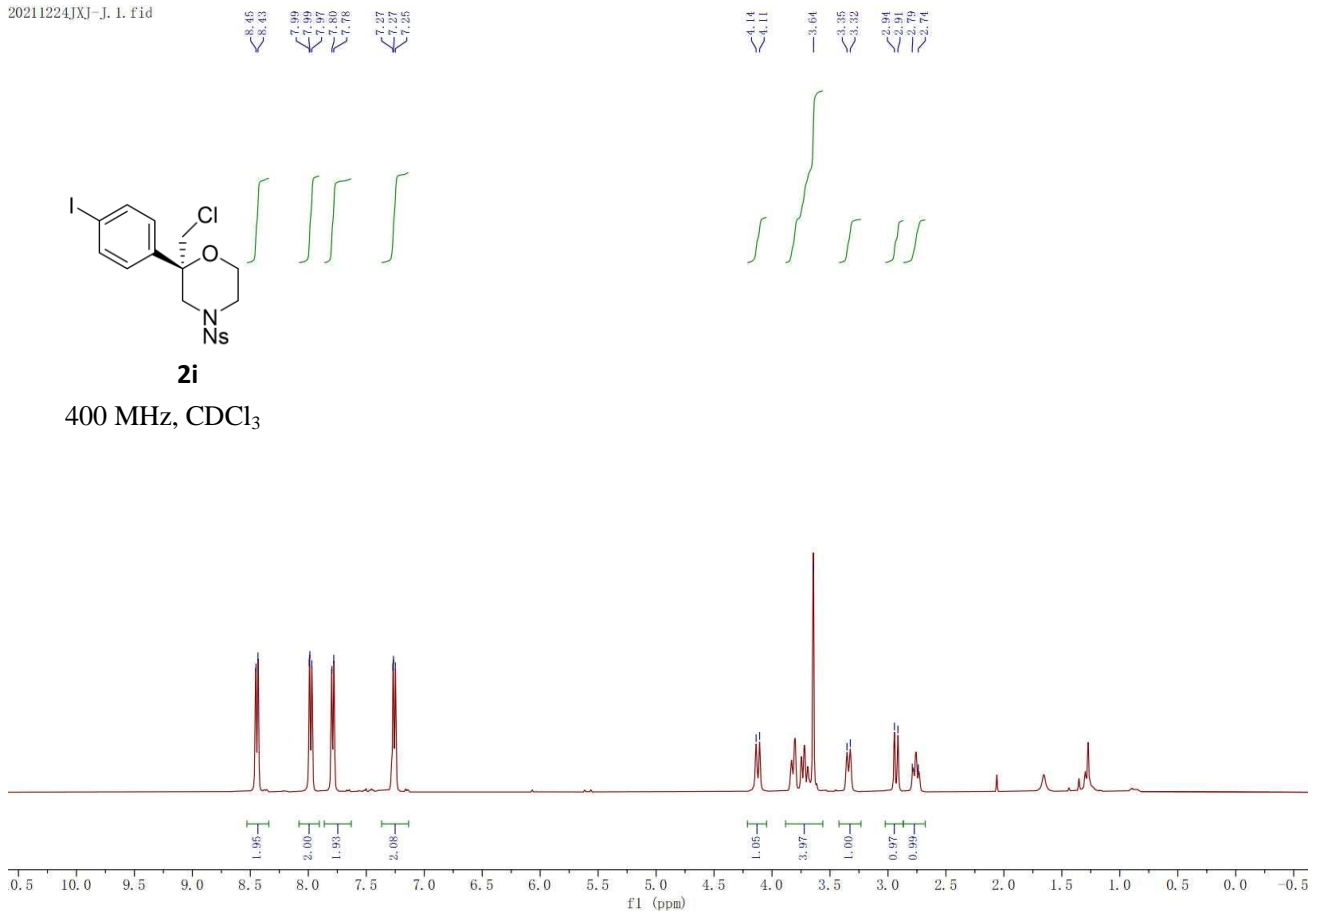

20211224JXJ-J. 2. fid

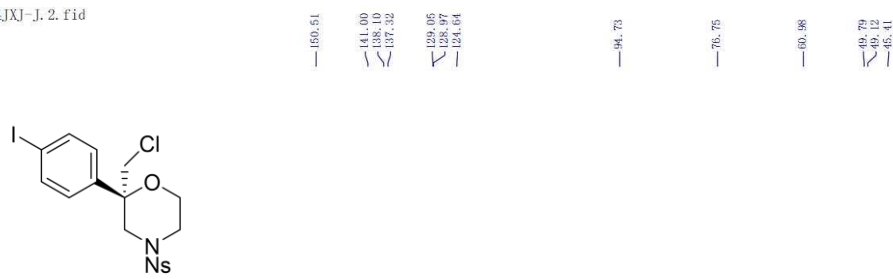

**2i**

100 MHz, CDCl<sub>3</sub>

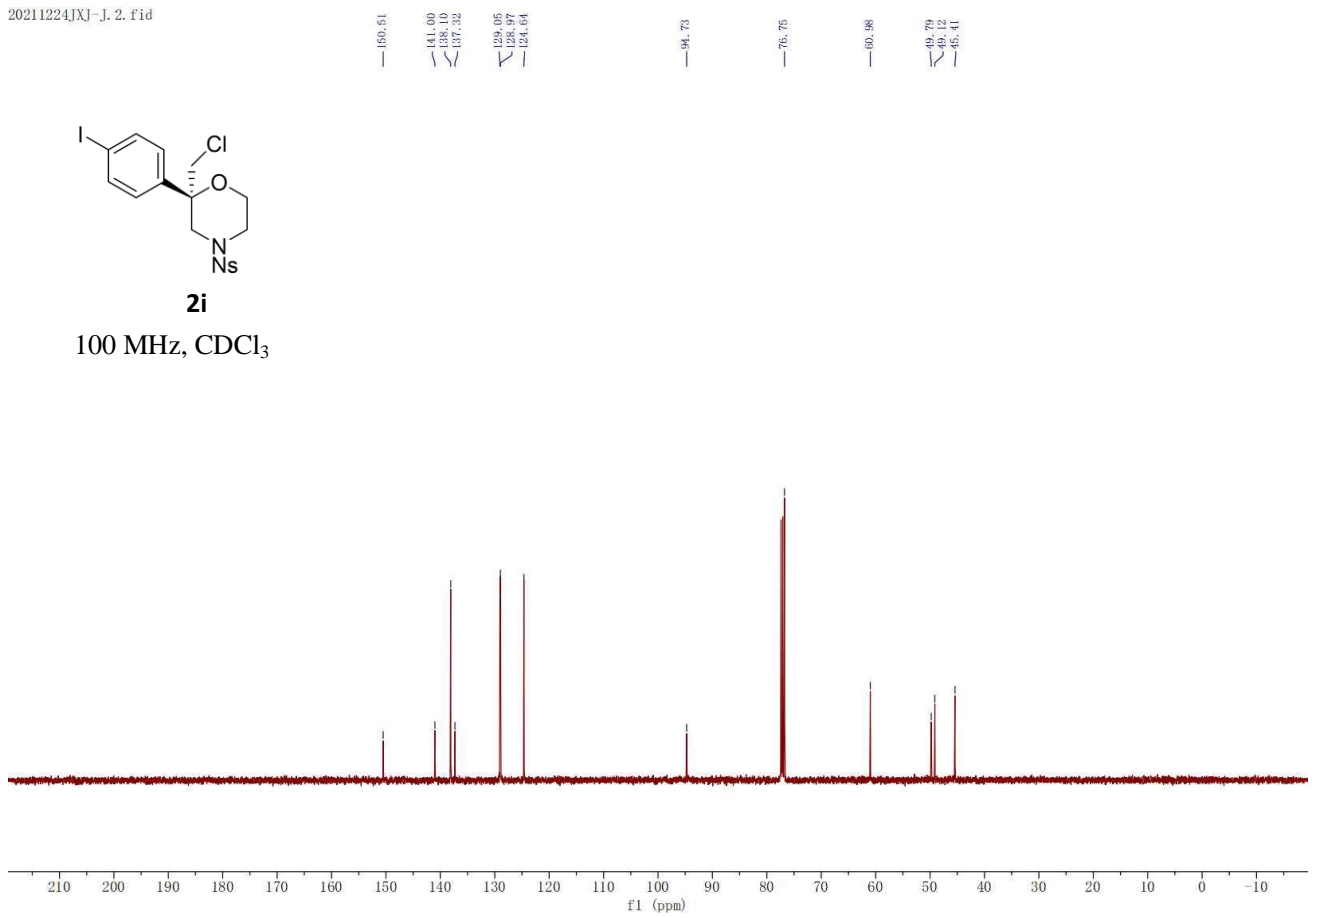



jx\_j2021.1020h.1.fid  
1

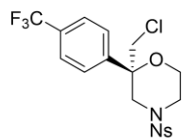

**2j**

400 MHz, CDCl<sub>3</sub>

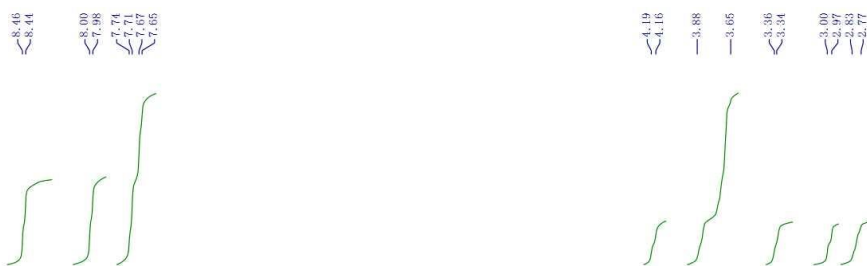

jx\_j2021.1023h.2.fid  
1

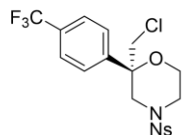

**2j**

100 MHz, CDCl<sub>3</sub>

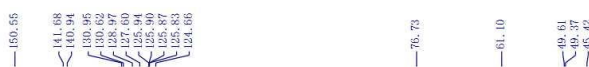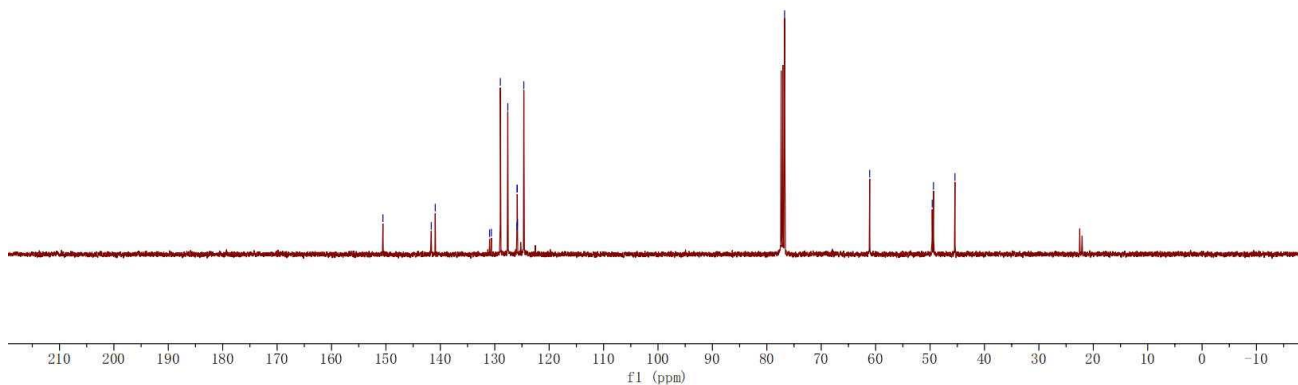

ixj\_2021.08.17.h.1.fid

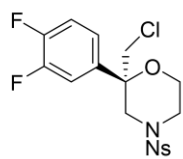

**2k**

400 MHz, CDCl<sub>3</sub>

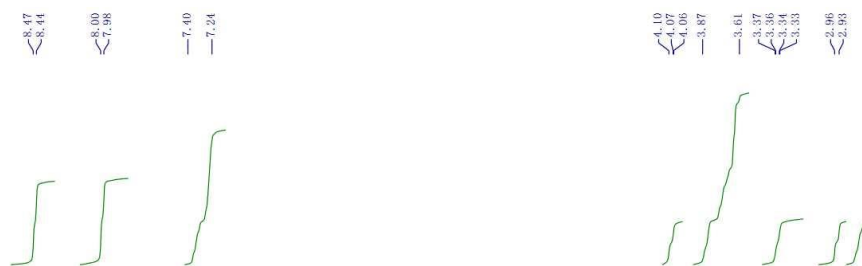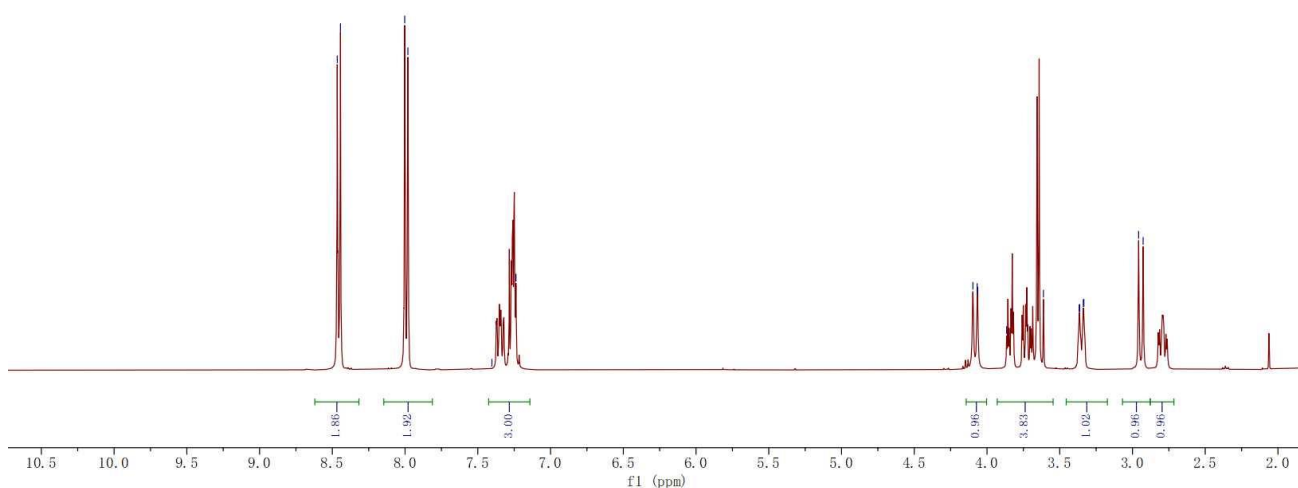

ixj\_2021.08.17.h.2.fid

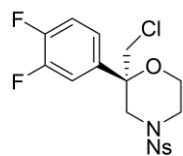

**2k**

100 MHz, CDCl<sub>3</sub>

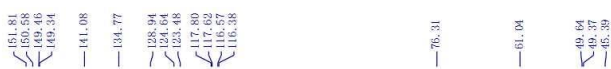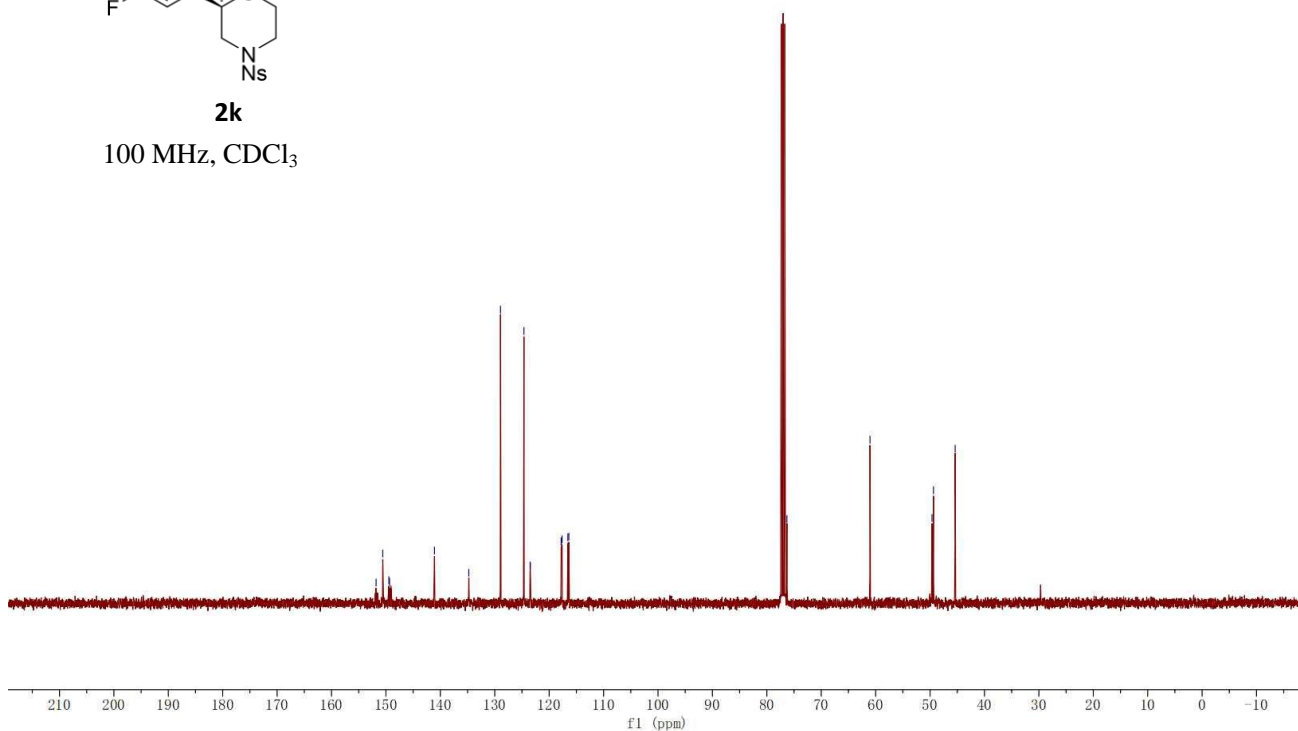

jx\_j2021.0625a.1.fid

8.46  
8.45  
8.44  
8.00  
7.99  
7.98  
7.98  
7.60  
7.55  
7.55  
7.37  
7.37  
7.35

4.07  
4.04  
3.85  
3.84  
3.83  
3.76  
3.73  
3.62  
3.55  
3.52  
2.97  
2.94  
2.84  
2.80

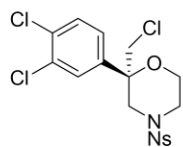

**21**

400 MHz, CDCl<sub>3</sub>

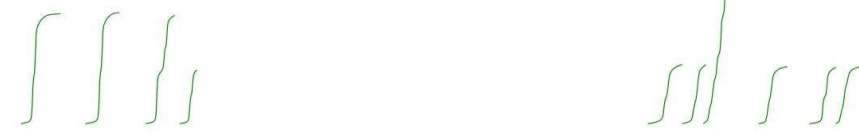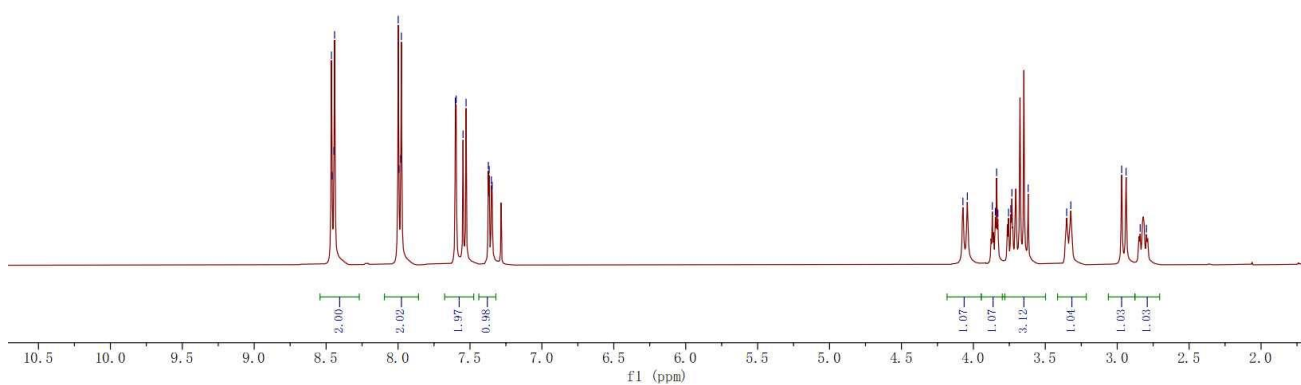

jx\_j2021.0625a.2.fid

150.55  
141.01  
137.99  
133.32  
132.96  
132.88  
128.95  
126.63  
124.98  
76.35  
61.10  
49.37  
45.38  
22.51

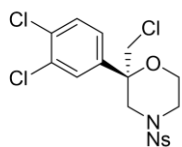

**21**

100 MHz, CDCl<sub>3</sub>

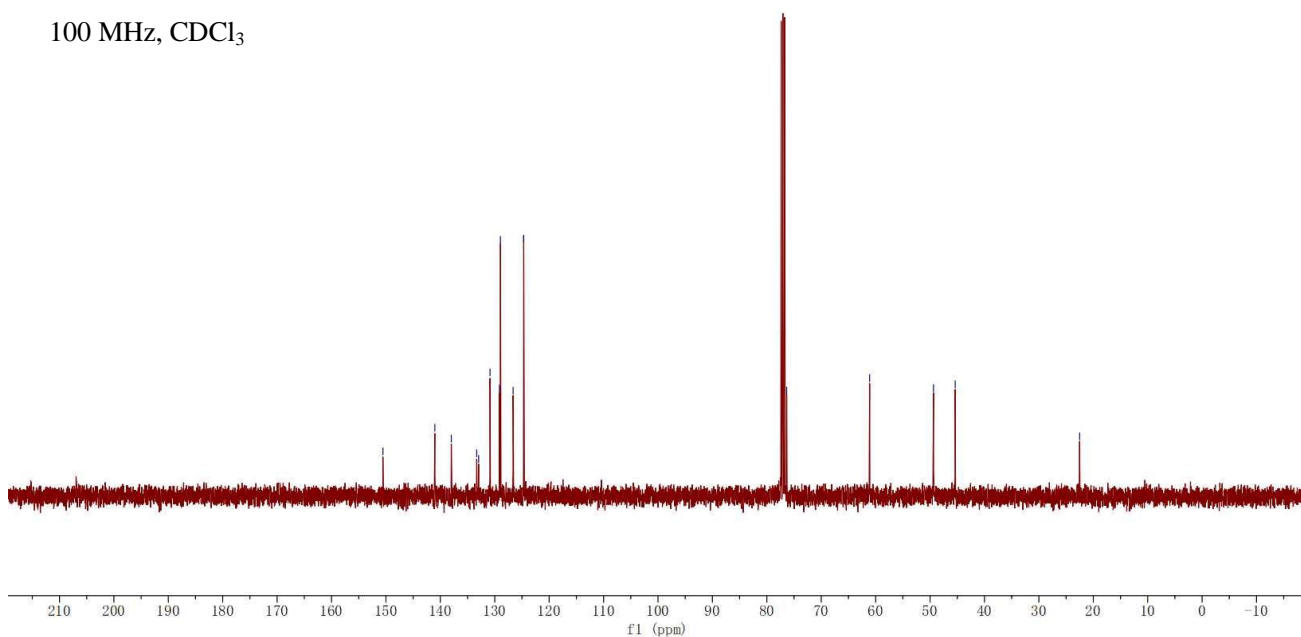

jxj2021.1119i.1.fid  
1

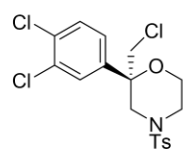

**2m**

400 MHz, CDCl<sub>3</sub>

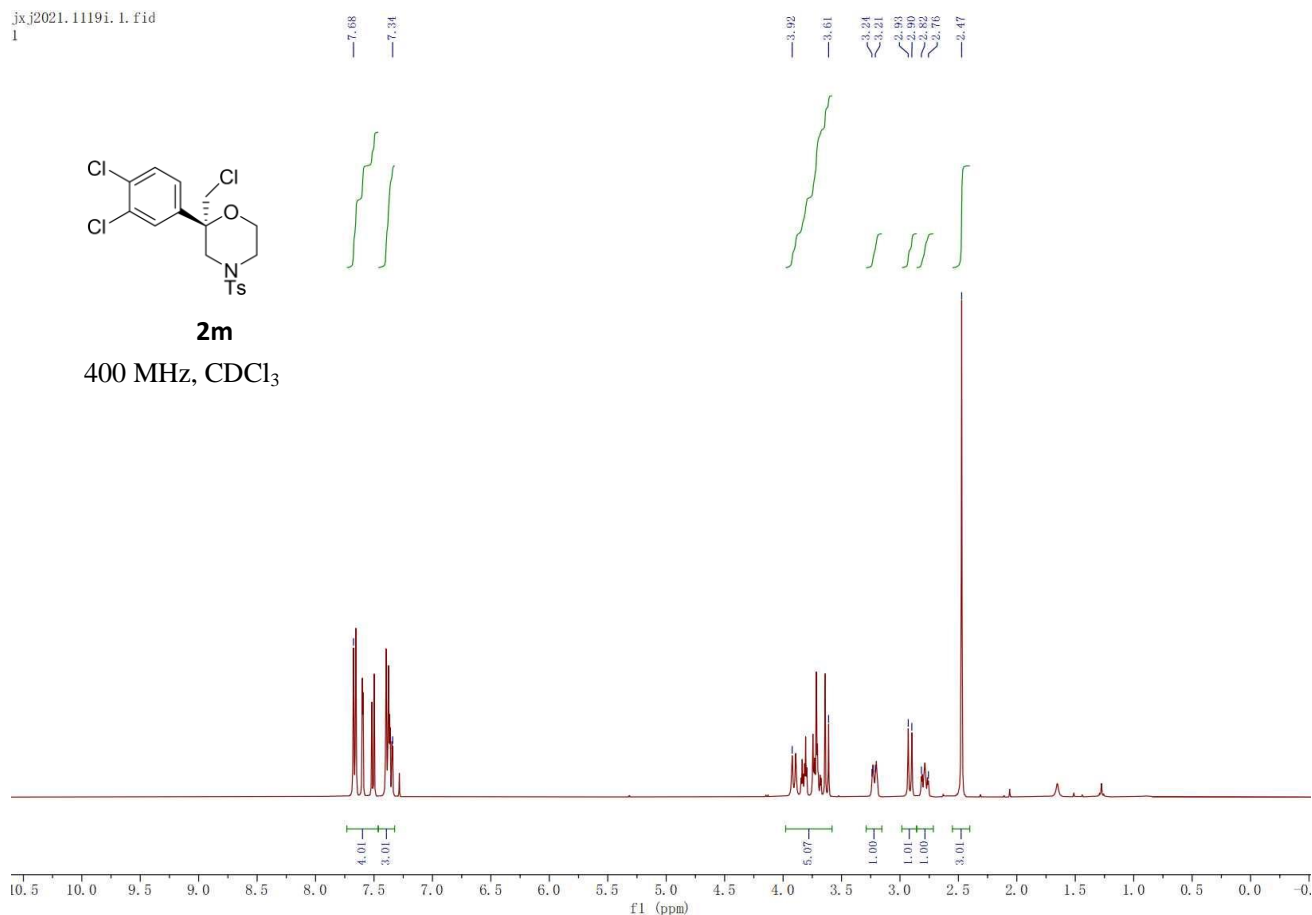

jxj2021.1119i.2.fid  
1

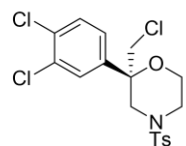

**2m**

100 MHz, CDCl<sub>3</sub>

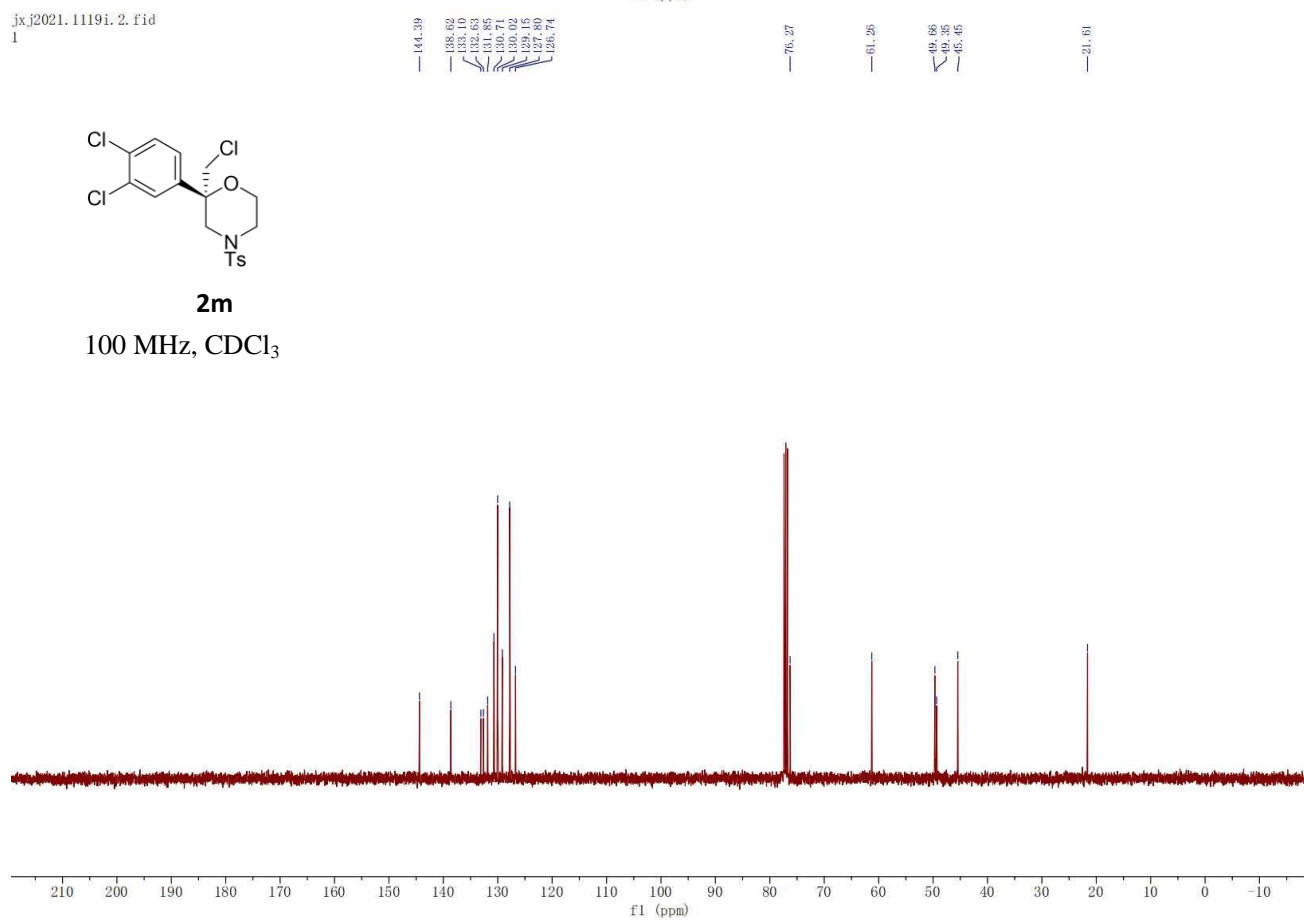

jxj2021.0410c. 1. fid  
1

8.45  
8.44  
8.43  
8.43  
7.99  
7.98  
7.97  
7.40  
7.38  
7.38  
7.37  
7.25

4.16  
4.13  
3.83  
3.63  
3.35  
3.31  
2.97  
2.79  
2.74  
2.39

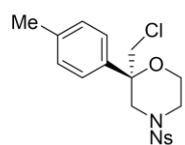

**2n**

400 MHz, CDCl<sub>3</sub>

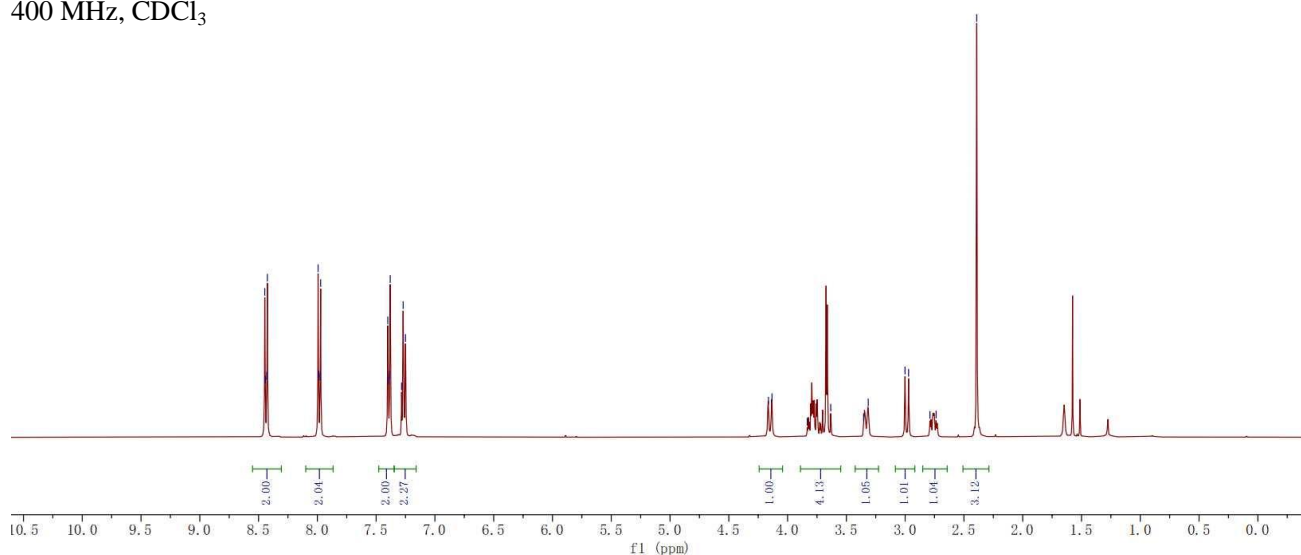

jxj2021.0815f. 2. fid  
1

150.46  
133.25  
133.27  
134.45  
129.65  
128.98  
128.66  
124.50

76.73  
60.81  
50.25  
49.12  
46.41  
21.09

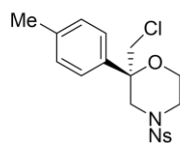

**2n**

100 MHz, CDCl<sub>3</sub>

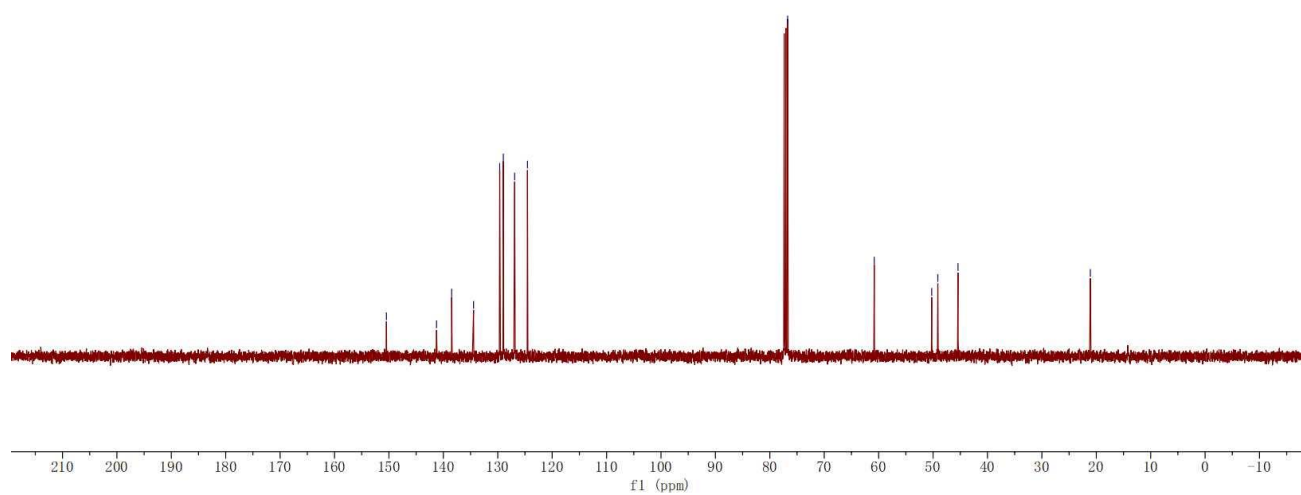

JXJ2021.0821C. 1. fid

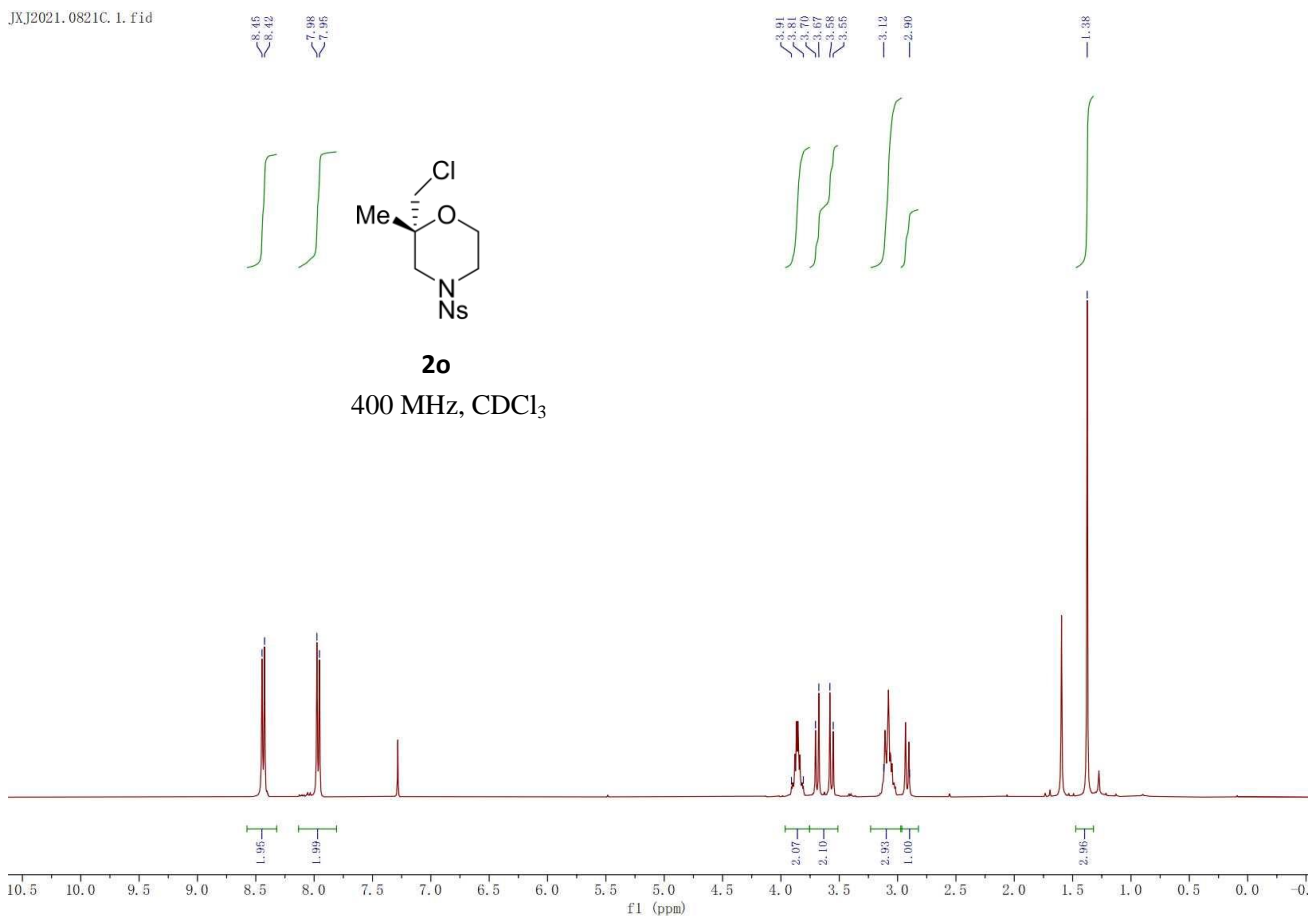

JXJ2021.0821C. 2. fid

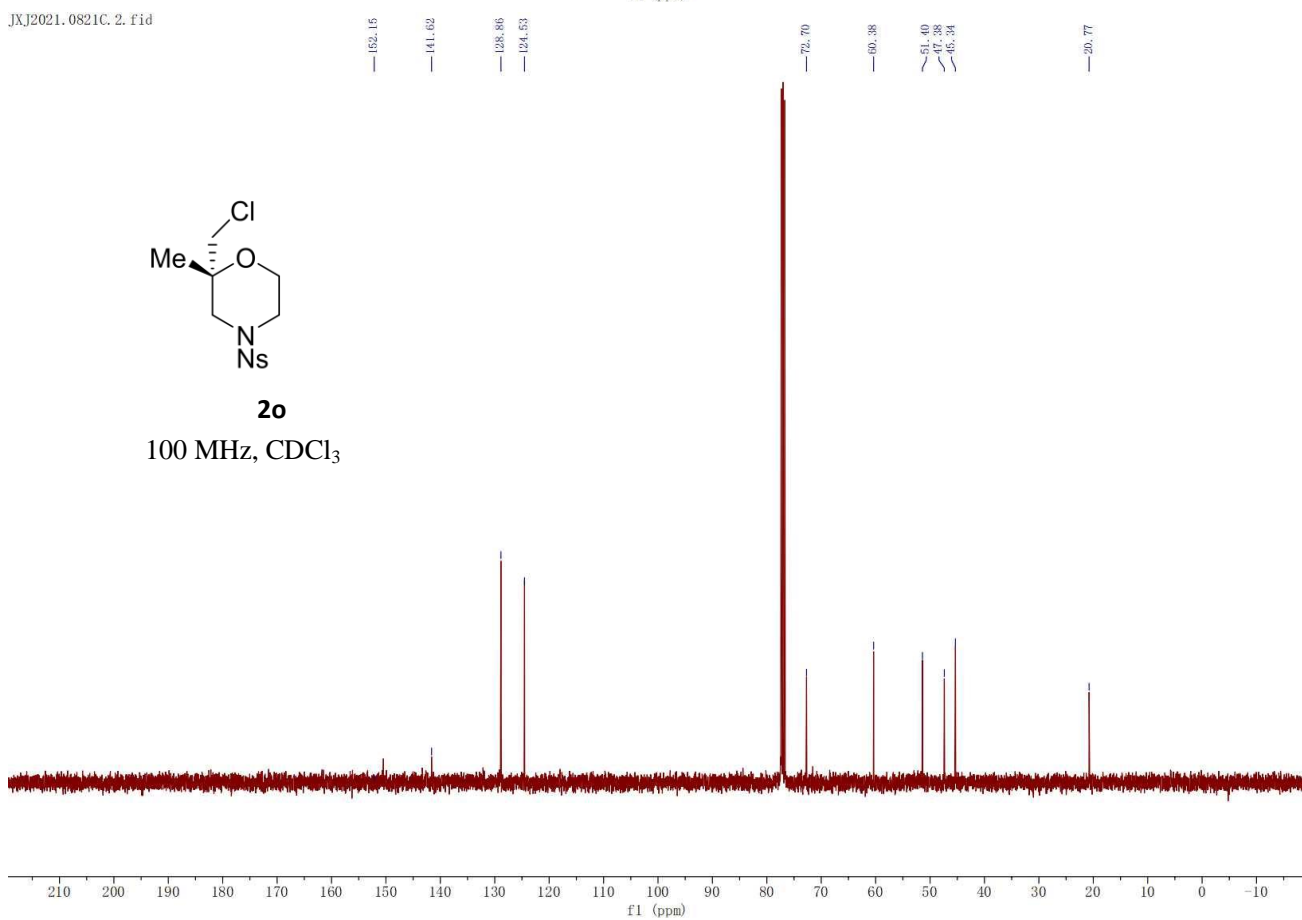

20220610JXJ-F. 1. fid

7.94  
7.92  
7.88  
7.85  
7.52  
7.37

4.07  
4.04  
3.85  
3.73  
3.65  
3.57  
3.25  
3.23  
3.10  
3.07  
2.85  
2.81

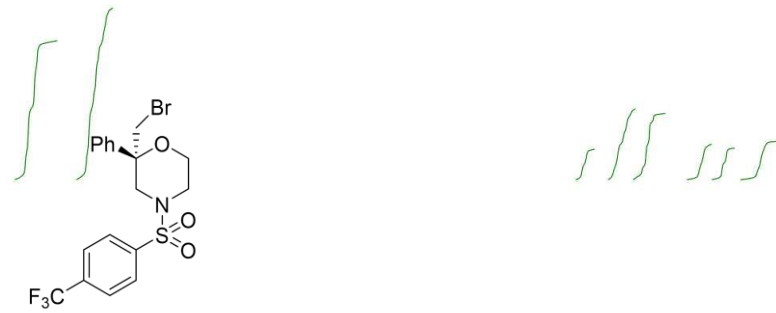

**2d-Br**

400 MHz, CDCl<sub>3</sub>

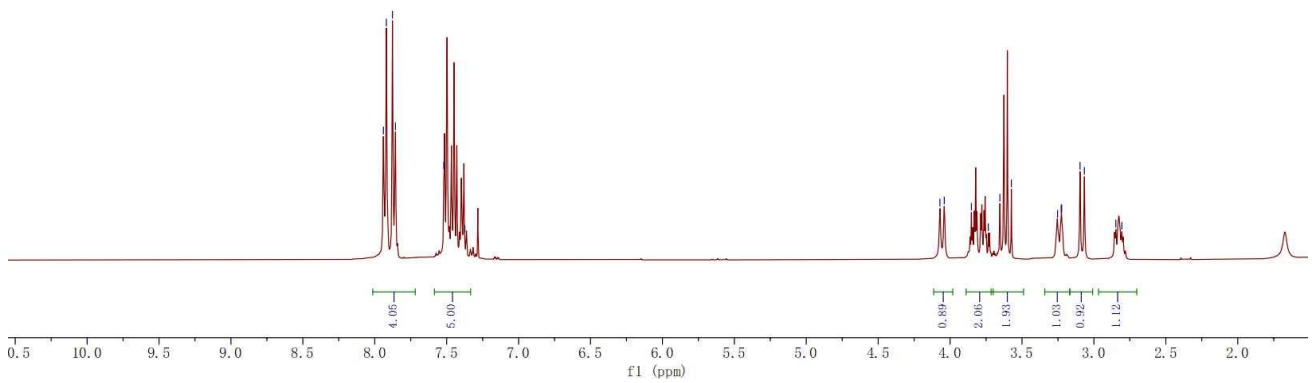

20220612JXJ-F. 2. fid

1

132.88  
132.94  
135.11  
138.88  
138.94  
128.29  
128.82  
128.56  
128.52  
128.49

75.99

61.07

50.13

45.37

38.72

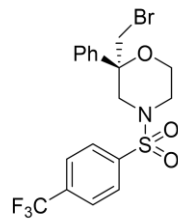

**2d-Br**

100 MHz, CDCl<sub>3</sub>

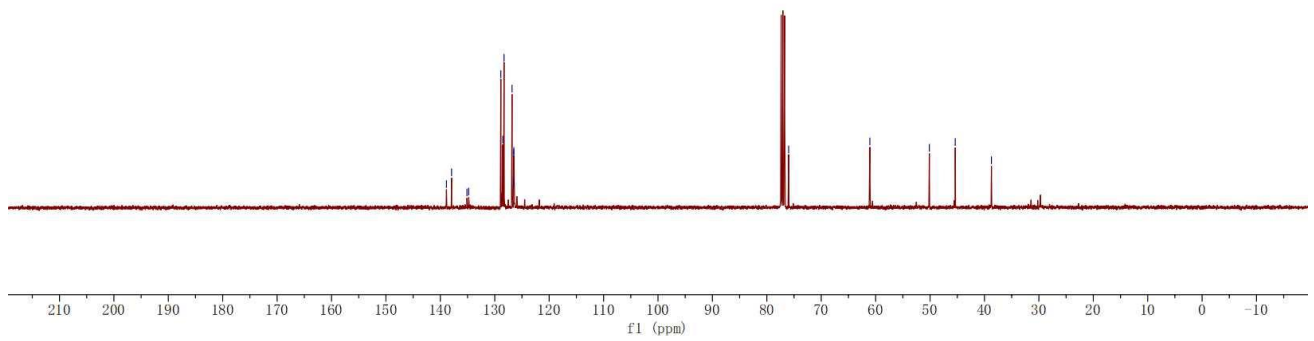

20220612[JX]-G. 1. fid

1

7.83  
7.81  
7.82  
7.65

7.49  
7.35

3.87  
3.75  
3.65  
3.63  
3.48  
3.45

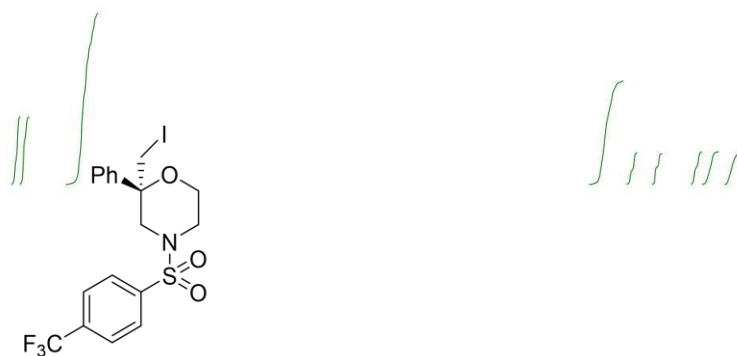

**2d-I**

400 MHz, CDCl<sub>3</sub>

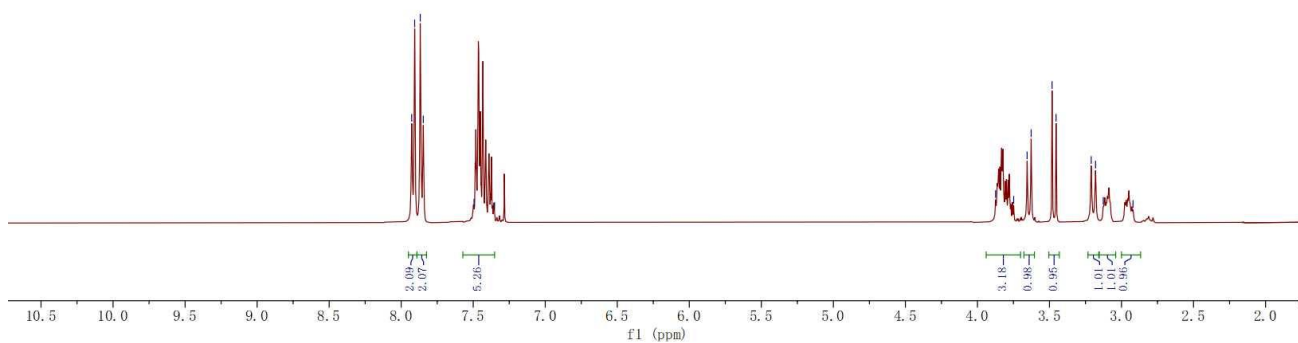

20220612[JX]-G. 2. fid

1

138.99  
138.55  
135.11  
134.78  
128.83  
128.55  
126.52  
126.48  
126.44  
126.38

74.96

61.12

51.38

45.32

13.84

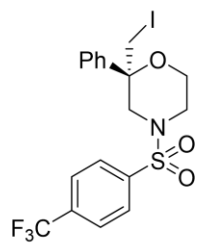

**2d-I**

100 MHz, CDCl<sub>3</sub>

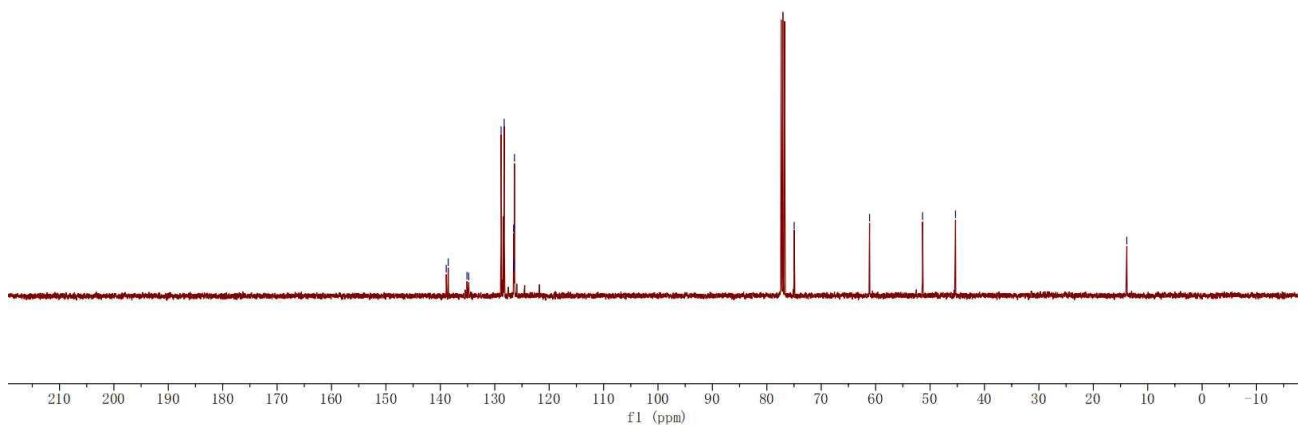



jx\_j2021.0221c.1.fid

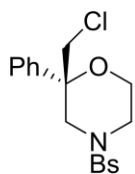

*ent-2r*

400 MHz, CDCl<sub>3</sub>

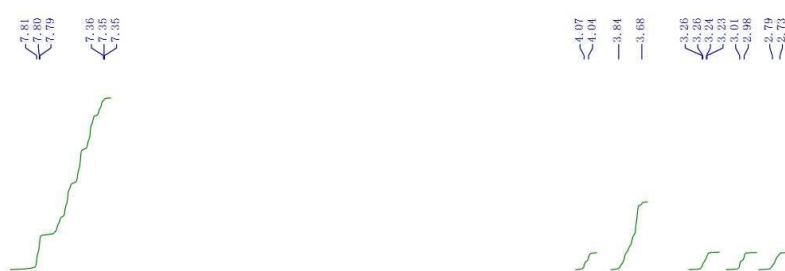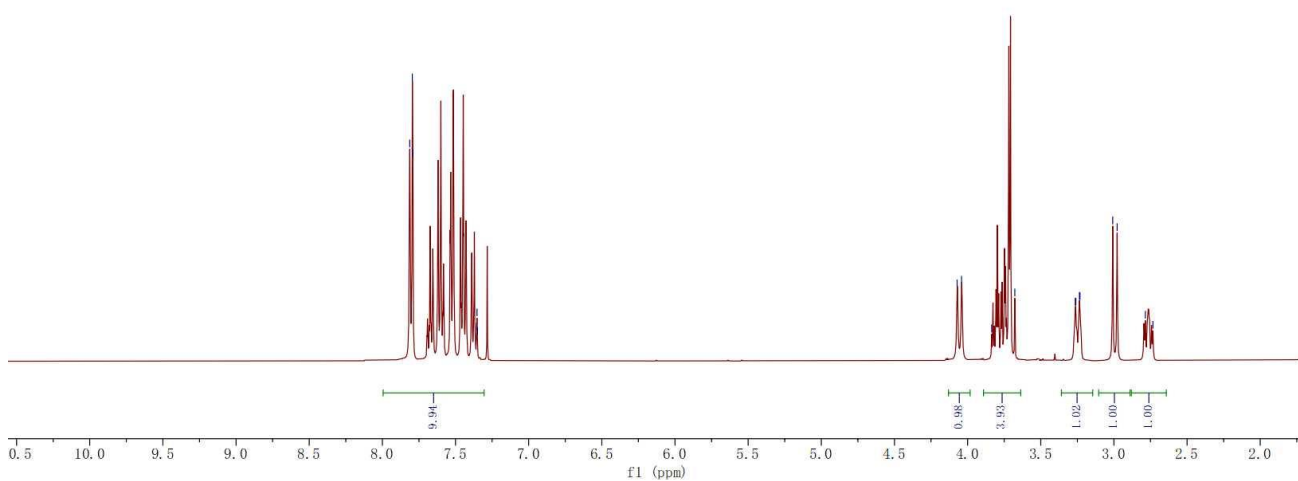

jx\_j2021.0221c.2.fid

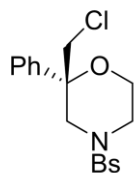

*ent-2r*

100 MHz, CDCl<sub>3</sub>

138.02  
135.02  
133.27  
133.32  
133.82  
127.81  
127.02

76.74

61.03

50.09  
49.35

45.48

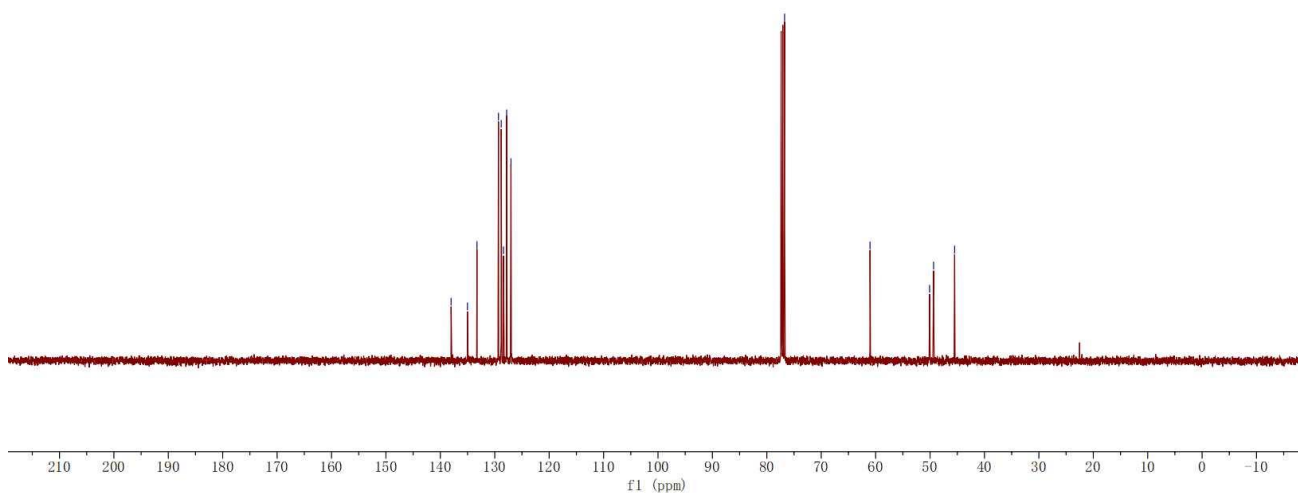

jxj2021.0410d.1.fid  
1

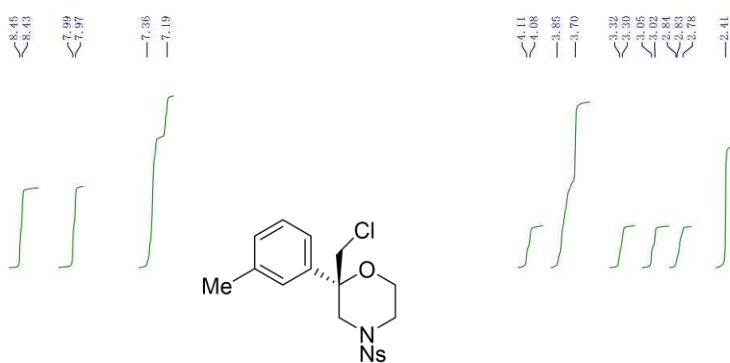

*ent-2s*  
400 MHz, CDCl<sub>3</sub>

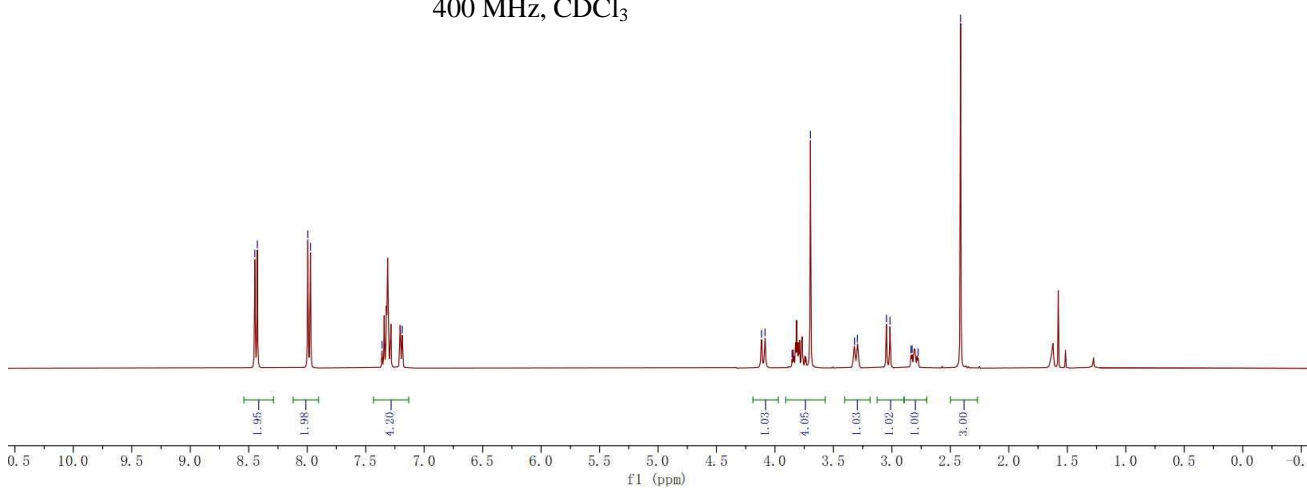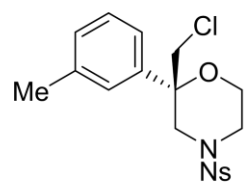

*ent-2s*  
100 MHz, CDCl<sub>3</sub>

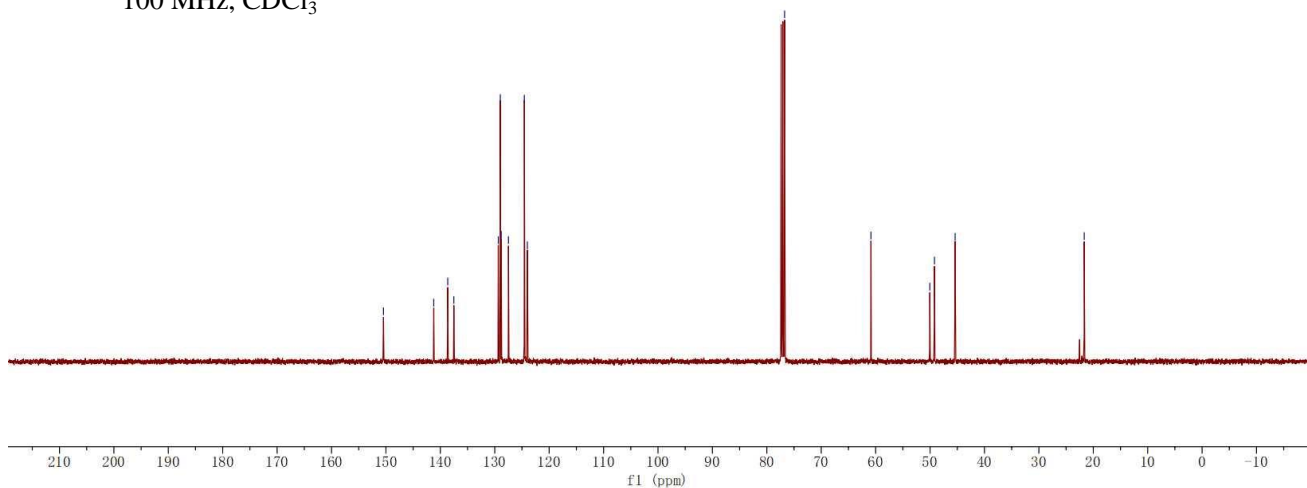

JXJ2021.0402C.1.fid

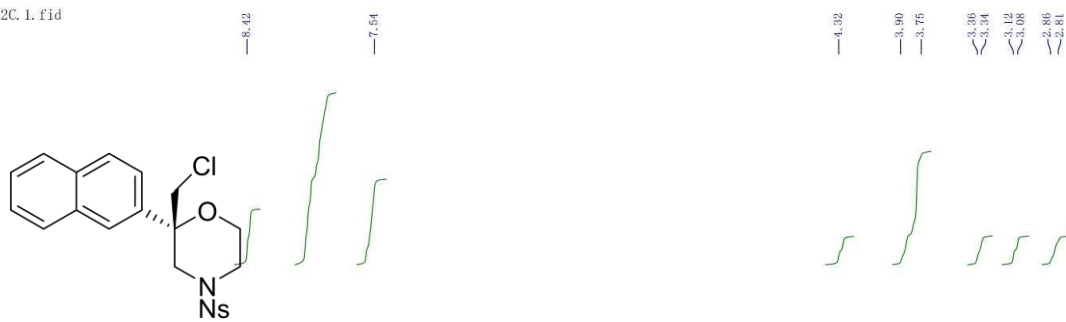

*ent-2t*

400 MHz, CDCl<sub>3</sub>

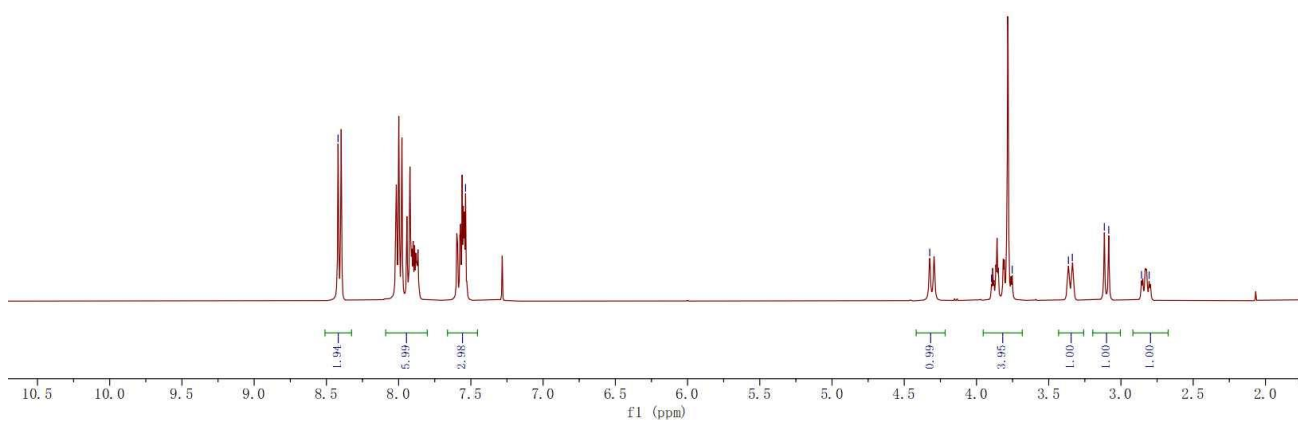

jxj2021.0815e.2.fid

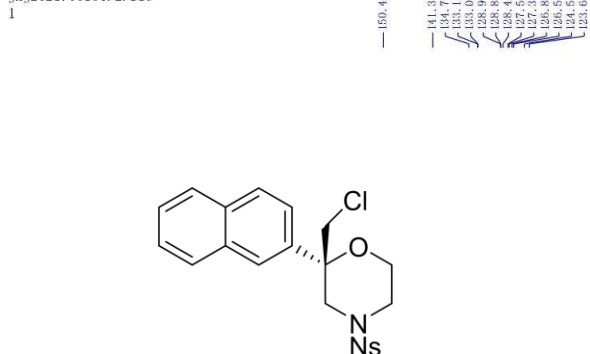

*ent-2t*

100 MHz, CDCl<sub>3</sub>

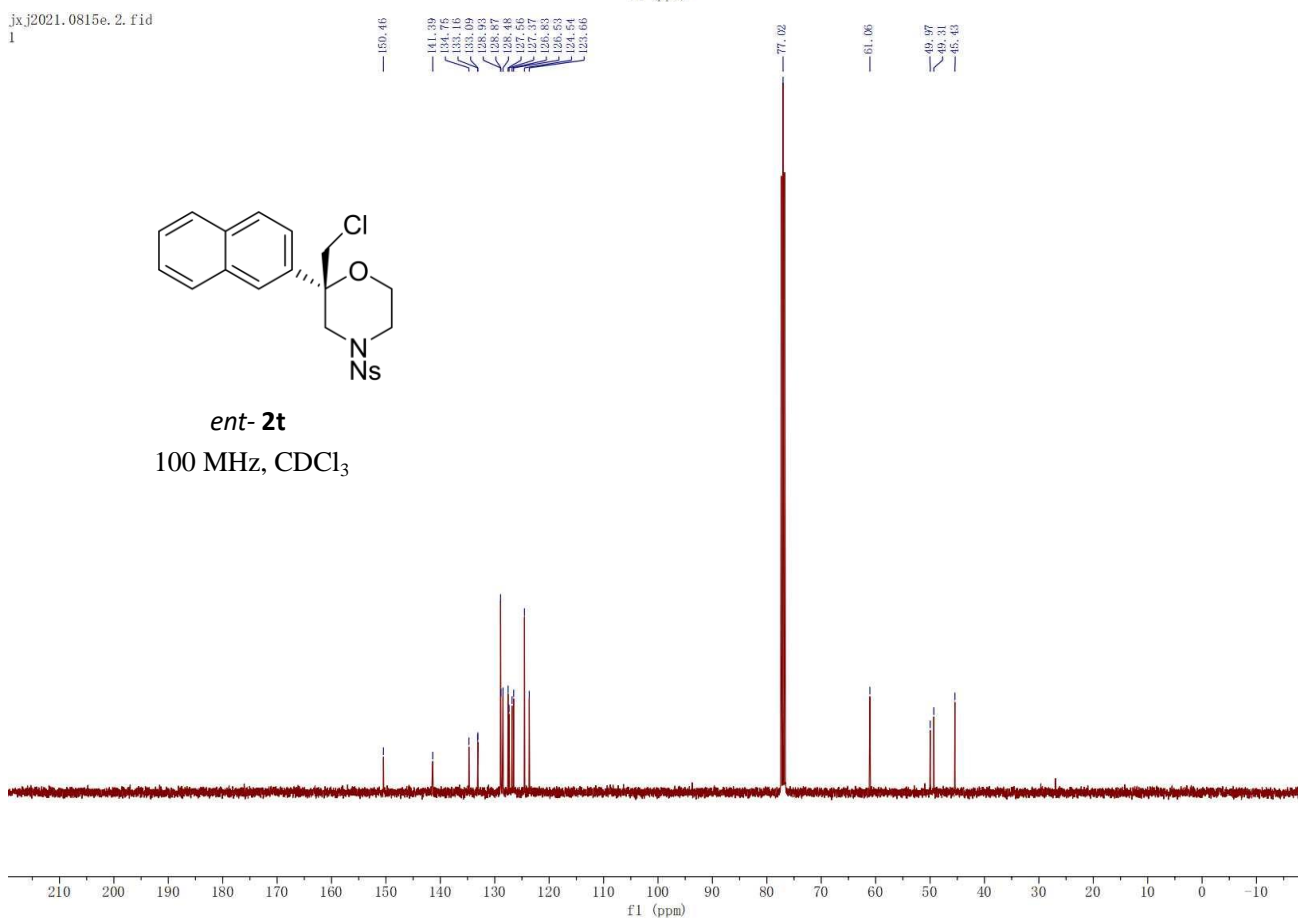

ix\_j2021.0221e.1.fid

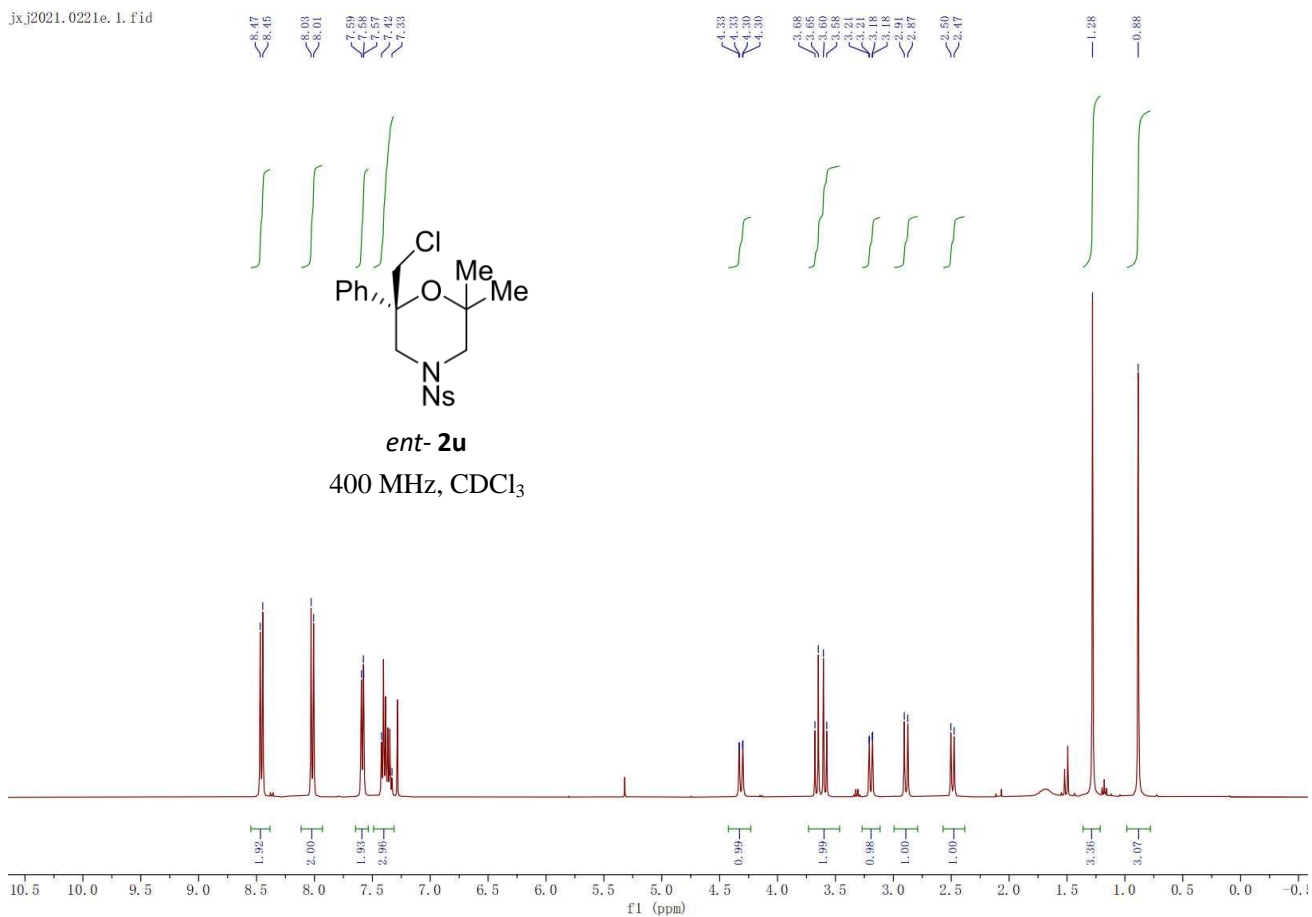

ix\_j2021.0221e.2.fid

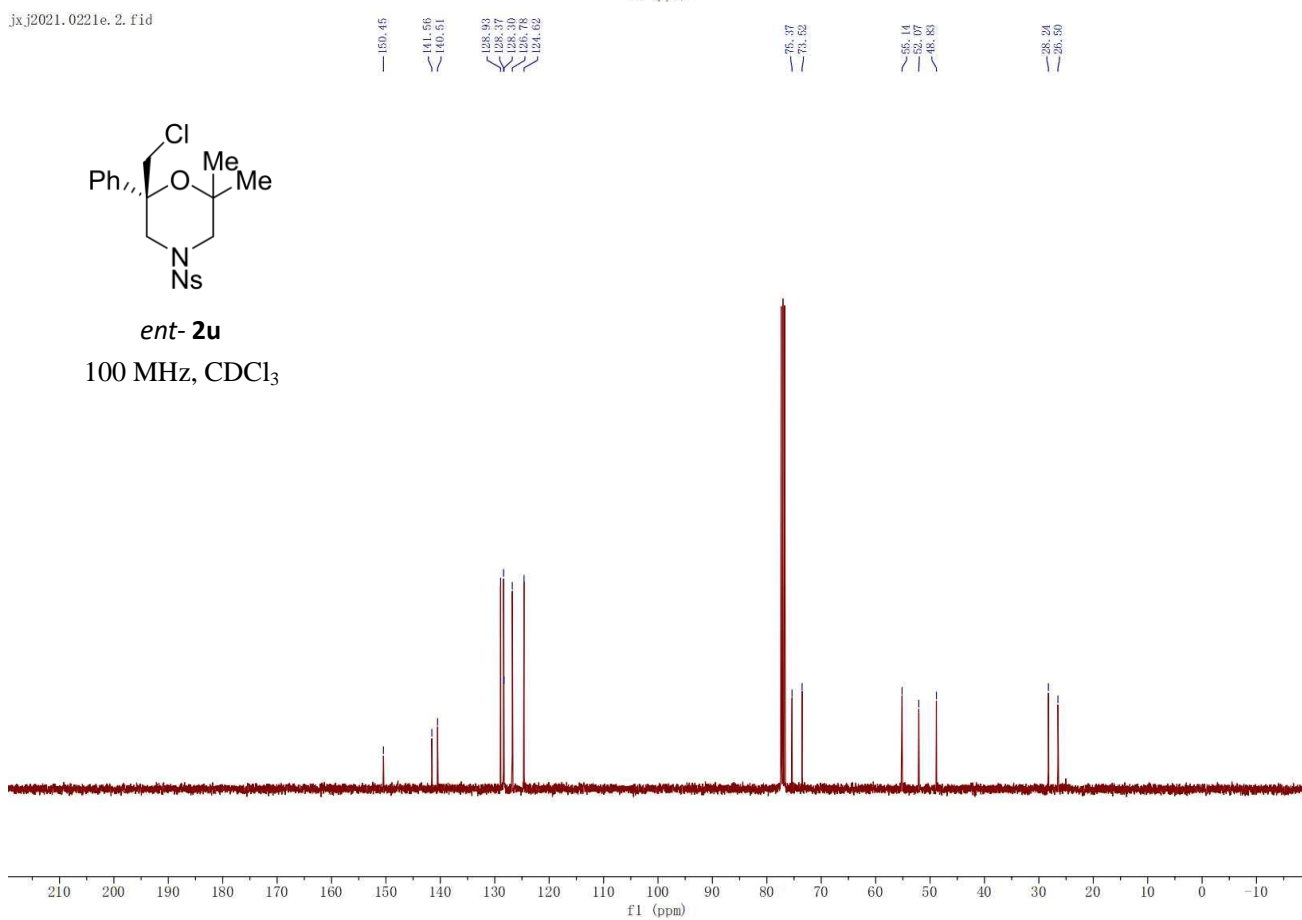

JXJ2021.1013B.1.fid

1

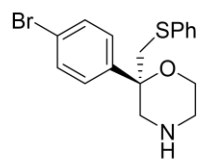

**4**

400 MHz, CDCl<sub>3</sub>

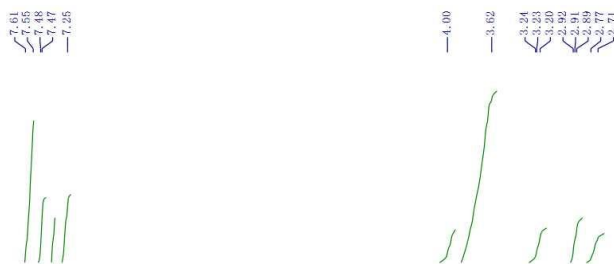

JXJ2021.1013B.2.fid

1

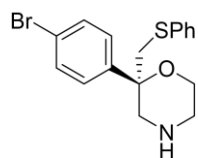

**4**

100 MHz, CDCl<sub>3</sub>

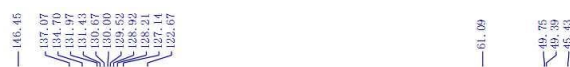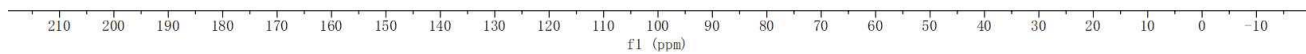

Supplement: d2qo00390b1.pdf [file d2qo00390b1.pdf]
